# Supplementary material for: Enantioselective [3 + 2] annulation of tryptanthrin-derived ketimines and 2-naphthols: access to polycyclic indolo[2,1-b]quinazoline derivatives
Source: Royal Society of Chemistry journal article supplement (doi:10.1039/d3qo02125d), 2024-01-01

# Enantioselective [3 + 2] Annulation Between Tryptanthrin-derived Ketimines and 2-Naphthols: Access to Polycyclic Indolo[2,1-*b*]quinazoline Derivatives

Yong You,<sup>\*a</sup> Guo-Ying Gan,<sup>a</sup> Qun Li,<sup>b,c</sup> Xiong-Li Liu,<sup>d</sup> Yan-Ping Zhang,<sup>\*a</sup> Zhen-Hua Wang,<sup>a</sup> Jian-Qiang Zhao,<sup>a</sup> and Wei-Cheng Yuan<sup>\*a</sup>

<sup>a</sup>Innovation Research Center of Chiral Drugs, Institute for Advanced Study, Chengdu University, Chengdu 610106, China.

<sup>b</sup>School of Materials and Environmental Engineering, Chengdu Technological University, Chengdu 611730, China

<sup>c</sup>College of Materials and Chemistry & Chemical Engineering, Chengdu University of Technology, Chengdu 610059, China

<sup>d</sup>Guizhou Engineering Center for Innovative Traditional Chinese Medicine and Ethnic Medicine, College of Pharmacy, Guizhou University, Guiyang 550025, China.

E-mail: youyong@cdu.edu.cn; zhangyanping@cdu.edu.cn; yuanwc@cioc.ac.cn

## Supporting Information

### Table of Contents

|                                                                                                |     |
|------------------------------------------------------------------------------------------------|-----|
| 1. General Methods .....                                                                       | S1  |
| 2. General procedure for the synthesis of tryptanthrine-derived ketimines 1 <sup>1</sup> ..... | S1  |
| 3. General procedure for the synthesis of racemic compounds 3 .....                            | S2  |
| 4. General procedure for the synthesis of compounds 3 .....                                    | S2  |
| 5. General procedure for the synthesis of compounds 5 .....                                    | S13 |
| 6. Gram-scale experiment .....                                                                 | S17 |
| 7. Control experiment .....                                                                    | S17 |
| 8. X-ray Crystal Structure of Compounds 3f and 5a .....                                        | S17 |
| 9. General experimental procedures for in vitro cytotoxicity assay .....                       | S20 |
| 10. References .....                                                                           | S20 |
| 11. HPLC spectra of compounds 3 and 5 .....                                                    | S21 |
| 12. <sup>1</sup> H and <sup>13</sup> C NMR spectra of compounds 1, 3 and 5 .....               | S51 |

## 1. General Methods

Chemical reagents were purchased from commercial sources and were used as received unless mentioned otherwise. Reactions were monitored by thin-layer chromatography (TLC).  $^1\text{H}$  NMR (400 MHz) and  $^{13}\text{C}$  NMR (101 MHz) spectra were recorded in  $\text{DMSO}-d_6$  and  $\text{CDCl}_3$ .  $^1\text{H}$  NMR chemical shifts are reported in ppm relative to tetramethylsilane (TMS), with the solvent resonance employed as the internal standard ( $\text{DMSO}-d_6$  at 2.50 ppm and  $\text{CDCl}_3$  at 7.26 ppm). Data are reported as follows: chemical shift, multiplicity (s = singlet, brs = broad singlet, d = doublet, t = triplet, q = quartet, m = multiplet), coupling constants (Hz) and integration.  $^{13}\text{C}$  NMR chemical shifts are reported in ppm from tetramethylsilane (TMS) with the solvent resonance as the internal standard ( $\text{DMSO}-d_6$  at 39.52 ppm and  $\text{CDCl}_3$  at 77.16 ppm). The enantiomeric excesses were determined by chiral HPLC analysis. HPLC analysis was performed on Agilent 1260 II. Chiral AD-H and IC columns were manufactured by Daicel Chemical Industries. HRMS was recorded on the Agilent 6545 LC/Q-TOF mass spectrometer. Optical rotations were measured with a Rudolph Autopol-III polarimeter. Melting points were recorded on a OptiMelt MPA 1000.

## 2. General procedure for the synthesis of tryptanthrine-derived ketimines **1**<sup>1</sup>

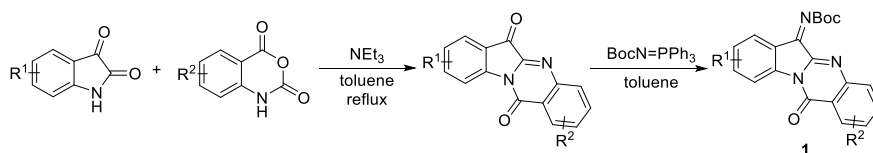

The tryptanthrine and substituted tryptanthrines were prepared according to the following procedures. To a flame-dried flask was added substituted isatin (20 mmol), substituted isatoic anhydride (22 mmol, 1.1 equiv), toluene (25 mL), and triethyl amine (100 mmol, 5 equiv). The mixture was refluxed for 12 h. After completion (monitored by TLC), the mixture was cooled to room temperature and filtered. The filter cake was washed with EtOH (15 mL $\times$ 2) and dried to give the substituted tryptanthrine, which was used for the next step without further purification.

To a flame-dried flask was added the substituted tryptanthrine (5 mmol), BocN=PPh<sub>3</sub> (10 mmol), and toluene (20 mL). The resulting mixture was refluxed to completion (monitored by TLC). After cooling to room temperature, the solvent was removed under vacuum. The residue was purified by flash chromatography on silica gel (petroleum ether /ethylacetate/ dichloromethane = 15:1:1–10:1:1) to give ketimine **1**.

### *tert*-Butyl (Z)-(8-methoxy-12-oxoindolo[2,1-*b*]quinazolin-6(12*H*)-ylidene)carbamate (**1g**)

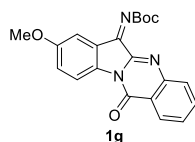

The product was purified by flash column chromatography (petroleum ether : ethyl acetate : dichloromethane = 10:1:1 as the eluent). Yellow solid; 65% yield.

$^1\text{H}$  NMR (400 MHz,  $\text{CDCl}_3$ )  $\delta$  8.47 – 8.34 (m, 2H), 7.78 (s, 2H), 7.64 – 7.56 (m, 1H), 7.39 (s, 1H), 7.18 (d,  $J$  = 8.5 Hz, 1H), 3.86 (s, 3H), 1.72 (s, 9H).

$^{13}\text{C}$  NMR (101 MHz,  $\text{CDCl}_3$ )  $\delta$  160.1, 158.7, 158.1, 153.5, 146.8, 142.6, 137.4, 134.7, 129.6, 127.4, 124.4, 123.3, 122.4, 118.7, 107.6, 84.0, 56.0, 28.4.

HRMS (ESI-TOF)  $m/z$   $[\text{M} + \text{Na}]^+$  calcd. for  $\text{C}_{21}\text{H}_{19}\text{N}_3\text{O}_4\text{Na}$  400.1268, found 400.1274.

### 3. General procedure for the synthesis of racemic compounds 3

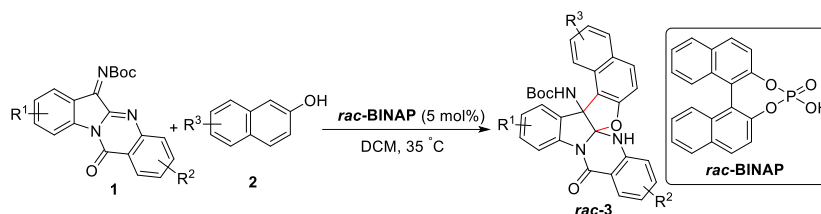

In an oven-dried tube, *rac*-BINAP (0.005 mmol), ketimines 1 (0.1 mmol), and DCM (2.0 ml) were added. To this suspension, 2-naphthol 2 (0.12 mmol) was then added. The resulting reaction mixture was stirred at 35 °C until the reaction was complete (monitored by TLC). The reaction mixture was concentrated under vacuum, and the residue was purified by flash chromatography on silica gel (petroleum ether : ethylacetate = 8:1–6:1) to give the racemic product 3.

### 4. General procedure for the synthesis of compounds 3

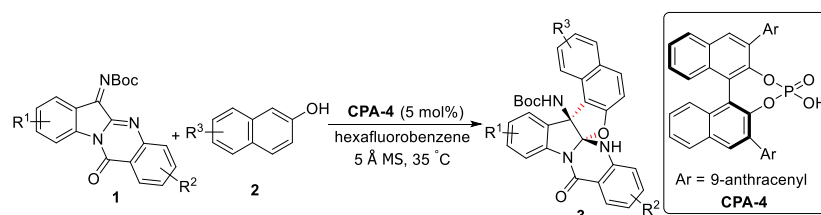

In an oven-dried tube, CPA-4 (0.005 mmol), ketimines 1 (0.1 mmol), dry 5 Å MS (50 mg), and hexafluorobenzene (4.0 ml) were added. To this suspension, 2-naphthol 2 (0.12 mmol) was then added. The resulting reaction mixture was stirred at 35 °C until the reaction was complete (monitored by TLC). The reaction mixture was concentrated under vacuum, and the residue was purified by flash chromatography on silica gel (petroleum ether : ethylacetate = 8:1–6:1) to give the product 3.

*tert*-Butyl

((4*cS*,15*aR*)-10-oxo-10,15-dihydro-4*cH*-naphtho[1'',2'':4',5']furo[2',3':2,3]indolo[2,1-*b*]quinazolin-4*c*-yl)carbamate (3a)

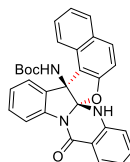

The product was purified by flash column chromatography (petroleum ether : ethyl acetate = 8:1–6:1 as the eluent).

Light yellow solid; 49.0 mg, 99% yield; mp 138.2–140.1 °C; >20:1 dr, 97% ee;  $[\alpha]_{\text{D}}^{20} = +299.44$  ( $c$  2.0,  $\text{CH}_2\text{Cl}_2$ ).

The ee was determined by HPLC (Chiralpak IC, ethanol/*n*-hexane 10/90, flow rate = 0.8 mL/min,  $\lambda$  = 254 nm)  $t_R$  = 13.0 min (minor), 8.9 min (major).

**<sup>1</sup>H NMR (400 MHz, DMSO-*d*<sub>6</sub>)** δ 8.65 (d, *J* = 7.6 Hz, 2H), 8.38 (d, *J* = 8.1 Hz, 1H), 8.09 (d, *J* = 7.8 Hz, 1H), 7.94 (d, *J* = 8.2 Hz, 1H), 7.87 – 7.68 (m, 3H), 7.56 (t, *J* = 7.5 Hz, 1H), 7.41 (dt, *J* = 23.4, 7.6 Hz, 2H), 7.30 – 6.66 (m, 5H), 1.47 – 0.57 (m, 9H).

**<sup>13</sup>C NMR (101 MHz, DMSO-*d*<sub>6</sub>)** δ 159.0, 155.0, 154.6, 143.1, 141.0, 134.5, 132.2, 130.8, 129.8, 129.4, 129.1, 127.7, 127.6, 125.0, 123.6, 122.1, 119.9, 117.7, 116.3, 115.8, 114.1, 113.2, 112.0, 79.3, 72.5, 27.6.

**HRMS (ESI-TOF)** *m/z* [M + H]<sup>+</sup> calcd. for C<sub>30</sub>H<sub>26</sub>N<sub>3</sub>O<sub>4</sub> 492.1918, found 492.1926.

*tert*-Butyl

**((4*cS*,15*aR*)-12-methyl-10-oxo-10,15-dihydro-4*cH*-naphtho[1'',2'':4',5']furo[2',3':2,3]indolo[2,1-*b*]quinazolin-4*c*-yl)carbamate (3b)**

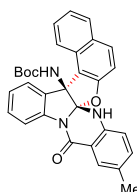

The product was purified by flash column chromatography (petroleum ether : ethyl acetate = 8:1–6:1 as the eluent).

Light yellow solid; 49.9 mg, 99% yield; mp 131.2–132.9 °C; >20:1 dr, 99% ee; [α]<sub>D</sub><sup>20</sup> = + 180.76 (*c* 0.7, CH<sub>2</sub>Cl<sub>2</sub>).

**The ee was determined by HPLC** (Chiralpak IC, ethanol/*n*-hexane 10/90, flow rate = 0.8 mL/min, λ = 254 nm) *t<sub>R</sub>* = 16.2 min (minor), 8.4 min (major).

**<sup>1</sup>H NMR (400 MHz, DMSO-*d*<sub>6</sub>)** δ 8.42 (dd, *J* = 117.9, 7.5 Hz, 3H), 7.93 (d, *J* = 8.2 Hz, 1H), 7.81 (d, *J* = 6.7 Hz, 2H), 7.71 (t, *J* = 6.5 Hz, 2H), 7.43 (t, *J* = 7.5 Hz, 1H), 7.36 (d, *J* = 7.4 Hz, 2H), 7.06 (td, *J* = 18.2, 17.5, 7.8 Hz, 4H), 2.34 (s, 3H), 1.28 – 0.61 (m, 9H).

**<sup>13</sup>C NMR (101 MHz, DMSO-*d*<sub>6</sub>)** δ 159.0, 154.9, 154.5, 141.2, 140.9, 135.5, 130.7, 129.7, 129.4, 129.0, 128.8, 127.7, 127.1, 124.9, 123.5, 122.2, 117.6, 116.1, 115.7, 115.6, 113.9, 113.5, 113.3, 112.0, 79.2, 72.4, 27.5, 20.2.

**HRMS (ESI-TOF)** *m/z* [M + H]<sup>+</sup> calcd. for C<sub>31</sub>H<sub>28</sub>N<sub>3</sub>O<sub>4</sub> 506.2074, found 506.2080.

*tert*-Butyl

**((4*cS*,15*aR*)-12-fluoro-10-oxo-10,15-dihydro-4*cH*-naphtho[1'',2'':4',5']furo[2',3':2,3]indolo[2,1-*b*]quinazolin-4*c*-yl)carbamate (3c)**

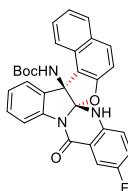

The product was purified by flash column chromatography (petroleum ether : ethyl acetate = 8:1–6:1 as the eluent).

Light yellow solid; 50.3 mg, 99% yield; mp 147.2–148.9 °C; >20:1 dr, 99% ee; [α]<sub>D</sub><sup>20</sup> = + 286.00 (*c* 1.1, CH<sub>2</sub>Cl<sub>2</sub>).

**The ee was determined by HPLC** (Chiralpak IB, ethanol/*n*-hexane 10/90, flow rate = 0.8 mL/min, λ = 254 nm) *t<sub>R</sub>* = 11.6 min (minor), 7.9 min (major).

**<sup>1</sup>H NMR (400 MHz, DMSO-*d*<sub>6</sub>)** δ 8.91 – 8.53 (m, 2H), 8.28 (d, *J* = 8.1 Hz, 1H), 7.93 (d, *J* = 8.2 Hz, 1H), 7.82 (d, *J* = 8.7 Hz, 1H), 7.78 – 7.66 (m, 3H), 7.52 – 7.41 (m, 2H), 7.40 – 7.33 (m, 1H),

7.29 – 6.73 (m, 4H), 1.38 – 0.81 (m, 9H).

**<sup>13</sup>C NMR (101 MHz, DMSO-*d*<sub>6</sub>)** δ 158.0, 156.0 (d, *J* = 237.6 Hz, 1C), 154.5, 140.5, 139.8, 130.9, 129.8, 129.4, 129.0 (d, *J* = 7.8 Hz, 1C), 127.7, 125.3, 123.5, 122.3 (d, *J* = 23.7 Hz, 1C), 117.8, 117.5, 116.2, 114.7, 114.6, 113.1, 112.6 (d, *J* = 23.9 Hz, 1C), 112.0, 79.3, 72.5, 27.6.

**HRMS (ESI-TOF)** *m/z* [M + Na]<sup>+</sup> calcd. for C<sub>30</sub>H<sub>24</sub>FN<sub>3</sub>O<sub>4</sub>Na 532.1643, found 532.1653.

*tert*-Butyl

**((4*cS*,15*aR*)-12-chloro-10-oxo-10,15-dihydro-4*cH*-naphtho[1'',2'':4',5']furo[2',3':2,3]indolo[2,1-*b*]quinazolin-4*c*-yl)carbamate (3d)**

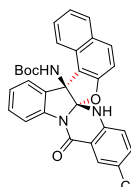

The product was purified by flash column chromatography (petroleum ether : ethyl acetate = 8:1–6:1 as the eluent).

Light yellow solid; 50.9 mg, 97% yield; mp 154.9–156.0 °C; >20:1 dr, 98% ee; [ $\alpha$ ]<sub>D</sub><sup>20</sup> = + 257.33 (*c* 1.6, CH<sub>2</sub>Cl<sub>2</sub>).

**The ee was determined by HPLC** (Chiralpak IC, ethanol/*n*-hexane 10/90, flow rate = 0.8 mL/min,  $\lambda$  = 254 nm) *t*<sub>R</sub> = 7.6 min (minor), 6.6 min (major).

**<sup>1</sup>H NMR (400 MHz, DMSO-*d*<sub>6</sub>)** δ 9.16 – 8.67 (m, 1H), 8.66 – 8.53 (m, 1H), 8.29 (d, *J* = 8.1 Hz, 1H), 8.01 – 7.89 (m, 2H), 7.83 (d, *J* = 8.8 Hz, 1H), 7.79 – 7.66 (m, 2H), 7.64 – 7.54 (m, 1H), 7.45 (t, *J* = 7.5 Hz, 1H), 7.38 (t, *J* = 7.7 Hz, 1H), 7.22 (d, *J* = 8.6 Hz, 1H), 7.18 – 6.69 (m, 3H), 1.36 – 0.78 (m, 9H).

**<sup>13</sup>C NMR (101 MHz, DMSO-*d*<sub>6</sub>)** δ 157.7, 154.8, 154.4, 141.9, 140.5, 134.3, 130.8, 129.8, 129.4, 129.3, 129.0, 127.7, 126.4, 125.4, 125.3, 123.7, 123.6, 122.3, 117.9, 117.4, 116.3, 115.1, 112.7, 111.9, 79.3, 72.5, 27.5.

**HRMS (ESI-TOF)** *m/z* [M + H]<sup>+</sup> calcd. for C<sub>30</sub>H<sub>25</sub>ClN<sub>3</sub>O<sub>4</sub> 526.1528, found 526.1532.

*tert*-Butyl

**((4*cS*,15*aR*)-12-bromo-10-oxo-10,15-dihydro-4*cH*-naphtho[1'',2'':4',5']furo[2',3':2,3]indolo[2,1-*b*]quinazolin-4*c*-yl)carbamate (3e)**

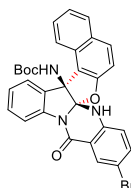

The product was purified by flash column chromatography (petroleum ether : ethyl acetate = 8:1–6:1 as the eluent).

Light yellow solid; 56.6 mg, 99% yield; mp 159.2–160.4 °C; >20:1 dr, 99% ee; [ $\alpha$ ]<sub>D</sub><sup>20</sup> = + 175.73 (*c* 1.5, CH<sub>2</sub>Cl<sub>2</sub>).

**The ee was determined by HPLC** (Chiralpak IC, ethanol/*n*-hexane 10/90, flow rate = 0.8 mL/min,  $\lambda$  = 254 nm) *t*<sub>R</sub> = 7.7 min (minor), 6.6 min (major).

**<sup>1</sup>H NMR (400 MHz, DMSO-*d*<sub>6</sub>)** δ 8.85 (s, 1H), 8.58 (d, *J* = 7.7 Hz, 1H), 8.27 (d, *J* = 8.1 Hz, 1H), 8.08 (d, *J* = 2.4 Hz, 1H), 7.93 (d, *J* = 8.2 Hz, 1H), 7.82 (d, *J* = 8.8 Hz, 1H), 7.71 (dd, *J* = 16.9, 8.3 Hz, 3H), 7.44 (t, *J* = 7.5 Hz, 1H), 7.37 (t, *J* = 7.7 Hz, 1H), 7.26 – 6.78 (m, 4H), 1.31 – 0.74 (m, 9H).

**<sup>13</sup>C NMR (101 MHz, DMSO)**  $\delta$  157.7, 154.8, 154.4, 142.3, 140.5, 137.0, 131.0, 129.8, 129.6, 129.41, 129.37, 129.0, 127.7, 125.4, 123.6, 122.2, 118.3, 117.4, 116.3, 115.6, 112.7, 111.9, 111.0, 79.3, 72.5, 27.5.

**HRMS (ESI-TOF)**  $m/z$   $[M + H]^+$  calcd. for C<sub>30</sub>H<sub>25</sub>BrN<sub>3</sub>O<sub>4</sub> 570.1023, found 570.1023.

*tert*-Butyl

**((4*cS*,15*aR*)-13-chloro-10-oxo-10,15-dihydro-4*cH*-naphtho[1'',2'':4',5']furo[2',3':2,3]indolo[2,1-*b*]quinazolin-4*c*-yl)carbamate (3f)**

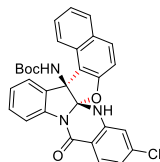

The product was purified by flash column chromatography (petroleum ether : ethyl acetate = 8:1–6:1 as the eluent).

Light yellow solid; 51.5 mg, 98% yield; mp 156.7–157.9 °C; >20:1 dr, 92% ee;  $[\alpha]_D^{20} = +294.25$  ( $c$  1.0, CH<sub>2</sub>Cl<sub>2</sub>).

**The ee was determined by HPLC** (Chiralpak IB, ethanol/*n*-hexane 20/80, flow rate = 1.0 mL/min,  $\lambda$  = 254 nm)  $t_R$  = 7.7 min (minor), 5.9 min (major).

**<sup>1</sup>H NMR (400 MHz, DMSO-*d*<sub>6</sub>)**  $\delta$  9.25 – 8.65 (m, 1H), 8.64 – 8.48 (m, 1H), 8.27 (d,  $J$  = 8.0 Hz, 1H), 8.00 (d,  $J$  = 8.4 Hz, 1H), 7.93 (d,  $J$  = 8.2 Hz, 1H), 7.82 (d,  $J$  = 8.7 Hz, 1H), 7.77 – 7.60 (m, 2H), 7.49 – 7.40 (m, 1H), 7.40 – 7.32 (m, 1H), 7.27 (s, 1H), 7.19 – 6.75 (m, 4H), 1.47 – 0.71 (m, 9H).

**<sup>13</sup>C NMR (101 MHz, DMSO-*d*<sub>6</sub>)**  $\delta$  158.2, 154.7, 154.4, 144.3, 140.5, 139.1, 130.9, 129.8, 129.5, 129.4, 129.0, 127.7, 125.3, 123.6, 122.4, 120.1, 117.4, 117.3, 116.2, 115.2, 112.8, 112.7, 111.9, 79.3, 72.5, 27.6.

**HRMS (ESI-TOF)**  $m/z$   $[M + H]^+$  calcd. for C<sub>30</sub>H<sub>25</sub>ClN<sub>3</sub>O<sub>4</sub> 526.1528, found 526.1531.

*tert*-Butyl

**((4*cS*,15*aR*)-6-methoxy-10-oxo-10,15-dihydro-4*cH*-naphtho[1'',2'':4',5']furo[2',3':2,3]indolo[2,1-*b*]quinazolin-4*c*-yl)carbamate (3g)**

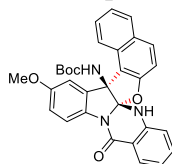

The product was purified by flash column chromatography (petroleum ether : ethyl acetate = 8:1–6:1 as the eluent).

Light yellow solid; 50.5 mg, 97% yield; mp 138.2–140.1 °C; >20:1 dr, 99% ee;  $[\alpha]_D^{20} = +262.37$  ( $c$  0.6, CH<sub>2</sub>Cl<sub>2</sub>).

**The ee was determined by HPLC** (Chiralpak IB, ethanol/*n*-hexane 10/90, flow rate = 0.8 mL/min,  $\lambda$  = 254 nm)  $t_R$  = 14.3 min (minor), 11.7 min (major).

**<sup>1</sup>H NMR (400 MHz, DMSO-*d*<sub>6</sub>)**  $\delta$  9.00 – 8.28 (m, 2H), 8.20 (d,  $J$  = 7.8 Hz, 1H), 8.06 – 7.86 (m, 2H), 7.86 – 7.64 (m, 2H), 7.60 – 7.34 (m, 2H), 7.34 – 6.38 (m, 6H), 3.65 (s, 3H), 1.45 – 0.56 (m, 9H).

**<sup>13</sup>C NMR (101 MHz, DMSO-*d*<sub>6</sub>)**  $\delta$  158.4, 156.7, 155.0, 154.5, 142.9, 134.3, 130.9, 129.7, 129.4, 129.1, 129.0, 127.7, 127.4, 123.6, 122.0, 119.8, 117.4, 117.0, 115.7, 114.1, 113.6, 113.4, 111.9, 109.9, 79.3, 72.4, 55.5, 27.6.

**HRMS (ESI-TOF)  $m/z$   $[M + Na]^+$  calcd. for  $C_{31}H_{27}N_3O_5Na$  544.1843, found 544.1852.**

***tert*-Butyl ((4*cS*,15*aR*)-6-methyl-10-oxo-10,15-dihydro-4*cH*-naphtho[1'',2'':4',5']furo[2',3':2,3]indolo[2,1-*b*]quinazolin-4*c*-yl)carbamate (3h)**

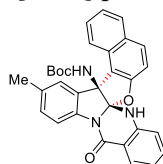

The product was purified by flash column chromatography (petroleum ether : ethyl acetate = 8:1–6:1 as the eluent).

Light yellow solid; 49.4 mg, 98% yield; mp 144.3–145.1 °C; >20:1 dr, 99% ee;  $[\alpha]_D^{20} = +307.74$  ( $c$  1.1,  $CH_2Cl_2$ ).

**The ee was determined by HPLC** (Chiralpak IC, ethanol/*n*-hexane 10/90, flow rate = 0.8 mL/min,  $\lambda$  = 254 nm)  $t_R$  = 17.6 min (minor), 9.4 min (major).

**$^1H$  NMR (400 MHz, DMSO- $d_6$ )**  $\delta$  8.93 – 8.26 (m, 2H), 8.18 (d,  $J$  = 8.2 Hz, 1H), 8.00 (d,  $J$  = 7.8 Hz, 1H), 7.93 (d,  $J$  = 8.2 Hz, 1H), 7.81 (d,  $J$  = 8.8 Hz, 1H), 7.73 (t,  $J$  = 7.4 Hz, 1H), 7.52 (t,  $J$  = 7.1 Hz, 2H), 7.43 (t,  $J$  = 7.5 Hz, 1H), 7.29 – 6.50 (m, 5H), 2.20 (s, 3H), 1.45 – 0.76 (d,  $J$  = 23.5 Hz, 9H).

**$^{13}C$  NMR (101 MHz, DMSO- $d_6$ )**  $\delta$  158.7, 155.0, 154.5, 143.0, 138.7, 134.4, 134.2, 130.7, 129.7, 129.3, 129.1, 127.7, 127.4, 123.9, 123.5, 122.0, 119.8, 117.6, 116.0, 115.8, 115.7, 114.1, 113.3, 111.9, 79.3, 72.4, 27.6, 20.8.

**HRMS (ESI-TOF)  $m/z$   $[M + H]^+$  calcd. for  $C_{31}H_{28}N_3O_4$  506.2074, found 522.2079.**

***tert*-Butyl ((4*cS*,15*aR*)-6-fluoro-10-oxo-10,15-dihydro-4*cH*-naphtho[1'',2'':4',5']furo[2',3':2,3]indolo[2,1-*b*]quinazolin-4*c*-yl)carbamate (3i)**

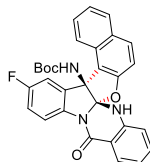

The product was purified by flash column chromatography (petroleum ether : ethyl acetate = 8:1–6:1 as the eluent).

Light yellow solid; 50.3 mg, 99% yield; mp 142.4–144.1 °C; >20:1 dr, 97% ee;  $[\alpha]_D^{20} = +284.75$  ( $c$  1.6,  $CH_2Cl_2$ ).

**The ee was determined by HPLC** (Chiralpak IC, ethanol/*n*-hexane 10/90, flow rate = 0.8 mL/min,  $\lambda$  = 254 nm)  $t_R$  = 16.9 min (minor), 7.0 min (major).

**$^1H$  NMR (400 MHz, DMSO- $d_6$ )**  $\delta$  8.90 – 8.45 (m, 2H), 8.34 – 8.25 (m, 1H), 8.01 (d,  $J$  = 7.8 Hz, 1H), 7.94 (d,  $J$  = 8.2 Hz, 1H), 7.84 (d,  $J$  = 8.8 Hz, 1H), 7.77 – 7.69 (m, 1H), 7.59 – 7.49 (m, 2H), 7.48 – 7.40 (m, 1H), 7.27 – 7.18 (m, 1H), 7.18 – 6.66 (m, 4H), 1.44 – 0.72 (m, 9H).

**$^{13}C$  NMR (101 MHz, DMSO- $d_6$ )**  $\delta$  159.1 (d,  $J$  = 242.4 Hz, 1C), 158.7, 154.8, 154.7, 143.0, 137.3, 134.6, 131.2, 129.8, 129.4, 128.9, 128.0, 127.5, 123.7, 122.2, 119.9, 117.4 (d,  $J$  = 8.1 Hz, 1C), 116.8, 115.7, 113.8, 113.3, 112.0, 110.6, 79.5, 72.3, 27.5.

**HRMS (ESI-TOF)  $m/z$   $[M + H]^+$  calcd. for  $C_{30}H_{25}FN_3O_4$  510.1824, found 510.1835.**

***tert*-Butyl ((4*cS*,15*aR*)-6-chloro-10-oxo-10,15-dihydro-4*cH*-**

**naphtho[1'',2'':4',5']furo[2',3':2,3]indolo[2,1-b]quinazolin-4c-yl)carbamate (3j)**

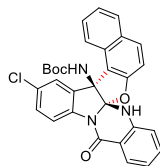

The product was purified by flash column chromatography (petroleum ether : ethyl acetate = 8:1–6:1 as the eluent).

Light yellow solid; 51.5 mg, 98% yield; mp 142.4–144.1 °C; >20:1 dr, 99% ee;  $[\alpha]_D^{20} = +255.31$  (*c* 2.6, CH<sub>2</sub>Cl<sub>2</sub>).

**The ee was determined by HPLC** (Chiralpak IC, ethanol/*n*-hexane 10/90, flow rate = 0.8 mL/min,  $\lambda$  = 254 nm) *t<sub>R</sub>* = 13.6 min (minor), 6.9 min (major).

**<sup>1</sup>H NMR (400 MHz, DMSO-*d*<sub>6</sub>)**  $\delta$  8.89 – 8.44 (m, 2H), 8.30 (d, *J* = 8.7 Hz, 1H), 8.02 (d, *J* = 7.8 Hz, 1H), 7.95 (d, *J* = 8.2 Hz, 1H), 7.84 (d, *J* = 8.8 Hz, 1H), 7.79 – 7.65 (m, 2H), 7.59 – 7.50 (m, 1H), 7.49 – 7.40 (m, 2H), 7.21 – 6.93 (m, 4H), 1.45 – 0.73 (m, 9H).

**<sup>13</sup>C NMR (101 MHz, DMSO-*d*<sub>6</sub>)**  $\delta$  158.9, 154.9, 154.7, 143.2, 139.8, 134.8, 131.3, 129.8, 129.5, 129.2, 128.9, 128.5, 128.0, 127.6, 123.8, 123.1, 122.2, 120.0, 117.6, 116.7, 115.8, 113.7, 113.1, 112.0, 79.6, 72.3, 27.6.

**HRMS (ESI-TOF)** *m/z* [M + H]<sup>+</sup> calcd. for C<sub>30</sub>H<sub>25</sub>ClN<sub>3</sub>O<sub>4</sub> 526.1528, found 526.1534.

***tert*-Butyl**

**((4*cS*,15*aR*)-6-bromo-10-oxo-10,15-dihydro-4*cH*-**

**naphtho[1'',2'':4',5']furo[2',3':2,3]indolo[2,1-b]quinazolin-4c-yl)carbamate (3k)**

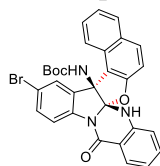

The product was purified by flash column chromatography (petroleum ether : ethyl acetate = 8:1–6:1 as the eluent).

Light yellow solid; 56.3 mg, 99% yield; mp 133.9–134.9 °C; >20:1 dr, 97% ee;  $[\alpha]_D^{20} = +170.88$  (*c* 1.9, CH<sub>2</sub>Cl<sub>2</sub>).

**The ee was determined by HPLC** (Chiralpak IC, ethanol/*n*-hexane 10/90, flow rate = 0.8 mL/min,  $\lambda$  = 254 nm) *t<sub>R</sub>* = 14.9 min (minor), 6.8 min (major).

**<sup>1</sup>H NMR (400 MHz, DMSO-*d*<sub>6</sub>)**  $\delta$  8.96 – 8.42 (m, 2H), 8.24 (d, *J* = 8.6 Hz, 1H), 8.01 (d, *J* = 7.8 Hz, 1H), 7.95 (d, *J* = 8.2 Hz, 1H), 7.90 – 7.79 (m, 2H), 7.78 – 7.70 (m, 1H), 7.62 – 7.51 (m, 2H), 7.50 – 7.41 (m, 1H), 7.23 – 6.75 (m, 4H), 1.45 – 0.77 (m, 9H).

**<sup>13</sup>C NMR (101 MHz, DMSO-*d*<sub>6</sub>)**  $\delta$  158.9, 154.9, 154.7, 143.1, 140.2, 134.8, 132.1, 131.2, 129.8, 129.5, 128.9, 128.0, 127.6, 126.0, 123.7, 122.1, 112.0, 118.0, 116.7, 116.3, 115.8, 113.7, 113.0, 112.0, 79.5, 72.2, 27.6.

**HRMS (ESI-TOF)** *m/z* [M + H]<sup>+</sup> calcd. for C<sub>30</sub>H<sub>25</sub>BrN<sub>3</sub>O<sub>4</sub> 570.1023, found 570.1029.

***tert*-Butyl**

**((4*cS*,15*aR*)-7-fluoro-10-oxo-10,15-dihydro-4*cH*-**

**naphtho[1'',2'':4',5']furo[2',3':2,3]indolo[2,1-b]quinazolin-4c-yl)carbamate (3l)**

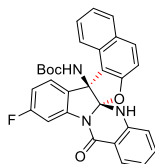

The product was purified by flash column chromatography (petroleum ether : ethyl acetate = 8:1 – 6:1 as the eluent).

Light yellow solid; 49.8 mg, 98% yield; mp 213.6–215.3 °C; >20:1 dr, 97% ee;  $[\alpha]_D^{20} = +267.22$  ( $c$  1.7, CH<sub>2</sub>Cl<sub>2</sub>).

The ee was determined by HPLC (Chiralpak IB, ethanol/*n*-hexane 10/90, flow rate = 0.8 mL/min,  $\lambda$  = 254 nm)  $t_R$  = 10.8 min (minor), 8.6 min (major).

**<sup>1</sup>H NMR (400 MHz, DMSO-*d*<sub>6</sub>)**  $\delta$  8.89 – 8.43 (m, 2H), 8.07 – 7.98 (m, 2H), 7.94 (d,  $J$  = 8.2 Hz, 1H), 7.83 (d,  $J$  = 8.8 Hz, 1H), 7.78 – 7.65 (m, 2H), 7.59 – 7.51 (m, 1H), 7.48 – 7.40 (m, 1H), 7.19 – 6.74 (m, 5H), 1.46 – 0.72 (m, 9H).

**<sup>13</sup>C NMR (101 MHz, DMSO-*d*<sub>6</sub>)**  $\delta$  162.4 (d,  $J$  = 244.4 Hz, 1C), 159.1, 154.9, 154.5, 143.2, 142.1, 134.9, 131.0, 129.8, 129.4, 128.9, 127.8, 127.6, 124.8, 123.7, 122.1, 120.0, 117.4, 115.9, 113.6, 113.5, 112.0, 111.7 (d,  $J$  = 22.2 Hz, 1C), 103.7 (d,  $J$  = 29.3 Hz, 1C), 79.4, 72.0, 27.6.

**HRMS (ESI-TOF)**  $m/z$   $[M + H]^+$  calcd. for C<sub>30</sub>H<sub>25</sub>FN<sub>3</sub>O<sub>4</sub> 510.1824, found 510.1826.

*tert*-Butyl

((4*cS*,15*aR*)-7-chloro-10-oxo-10,15-dihydro-4*cH*-

naphtho[1'',2'':4',5']furo[2',3':2,3]indolo[2,1-*b*]quinazolin-4*c*-yl)carbamate (3m)

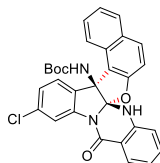

The product was purified by flash column chromatography (petroleum ether : ethyl acetate = 8:1 – 6:1 as the eluent).

Light yellow solid; 51.4 mg, 98% yield; mp 138.9–140.6 °C; >20:1 dr, 98% ee;  $[\alpha]_D^{20} = +320.83$  ( $c$  0.6, CH<sub>2</sub>Cl<sub>2</sub>).

The ee was determined by HPLC (Chiralpak IB, ethanol/*n*-hexane 5/95, flow rate = 0.8 mL/min,  $\lambda$  = 254 nm)  $t_R$  = 17.6 min (minor), 11.3 min (major).

**<sup>1</sup>H NMR (400 MHz, DMSO-*d*<sub>6</sub>)**  $\delta$  8.95 – 8.45 (m, 2H), 8.33 – 8.27 (m, 1H), 8.01 (d,  $J$  = 7.8 Hz, 1H), 7.95 (d,  $J$  = 8.2 Hz, 1H), 7.85 (d,  $J$  = 8.8 Hz, 1H), 7.79 – 7.66 (m, 2H), 7.60 – 7.52 (m, 1H), 7.49 – 7.41 (m, 1H), 7.25 – 7.18 (m, 1H), 7.17 – 6.67 (m, 4H), 1.43 – 0.73 (m, 9H).

**<sup>13</sup>C NMR (101 MHz, DMSO-*d*<sub>6</sub>)**  $\delta$  159.1, 154.9, 154.6, 143.2, 142.0, 134.9, 133.5, 131.2, 129.8, 129.4, 128.9, 127.9, 127.6, 124.9, 123.7, 122.2, 120.0, 117.0, 115.9, 113.5, 113.2, 112.0, 79.5, 72.1, 27.5.

**HRMS (ESI-TOF)**  $m/z$   $[M + H]^+$  calcd. for C<sub>30</sub>H<sub>25</sub>ClN<sub>3</sub>O<sub>4</sub> 526.1528, found 526.1537.

*tert*-Butyl

((4*cS*,15*aR*)-7-bromo-10-oxo-10,15-dihydro-4*cH*-

naphtho[1'',2'':4',5']furo[2',3':2,3]indolo[2,1-*b*]quinazolin-4*c*-yl)carbamate (3n)

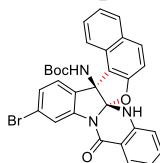

The product was purified by flash column chromatography (petroleum ether : ethyl acetate = 8:1–6:1 as the eluent).

Light yellow solid; 53.0 mg, 93% yield; mp 151.8–153.2 °C; >20:1 dr, 98% ee;  $[\alpha]_{\text{D}}^{20} = +212.37$  ( $c$  0.7,  $\text{CH}_2\text{Cl}_2$ ).

The ee was determined by HPLC (Chiralpak IB, ethanol/*n*-hexane 10/90, flow rate = 0.8 mL/min,  $\lambda = 254$  nm)  $t_{\text{R}} = 11.5$  min (minor), 8.2 min (major).

**$^1\text{H}$  NMR (400 MHz,  $\text{DMSO}-d_6$ )**  $\delta$  8.99 – 8.19 (m, 3H), 8.01 (d,  $J = 7.7$  Hz, 1H), 7.95 (d,  $J = 8.2$  Hz, 1H), 7.85 (d,  $J = 8.8$  Hz, 1H), 7.80 – 7.62 (m, 2H), 7.56 (t,  $J = 7.5$  Hz, 1H), 7.45 (t,  $J = 7.5$  Hz, 1H), 7.33 (d,  $J = 8.1$  Hz, 1H), 7.27 – 7.77 (m, 4H), 1.41 – 0.61 (m, 9H).

**$^{13}\text{C}$  NMR (101 MHz,  $\text{DMSO}-d_6$ )**  $\delta$  159.1, 154.9, 154.6, 143.2, 142.1, 134.9, 131.1, 129.8, 129.4, 128.9, 127.9, 127.8, 127.6, 125.1, 123.7, 122.1, 121.8, 120.0, 118.7, 116.9, 115.8, 113.5, 113.1, 112.0, 79.5, 72.2, 27.5.

**HRMS (ESI-TOF)**  $m/z$   $[\text{M} + \text{Na}]^+$  calcd. for  $\text{C}_{30}\text{H}_{24}\text{BrN}_3\text{O}_4\text{Na}$  594.0827, found 594.0842.

*tert*-Butyl

**((4*cS*,15*aR*)-3-methoxy-10-oxo-10,15-dihydro-4*cH*-naphtho[1'',2'':4',5']furo[2',3':2,3]indolo[2,1-*b*]quinazolin-4*c*-yl)carbamate (3o)**

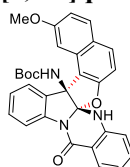

The product was purified by flash column chromatography (petroleum ether : ethyl acetate = 8:1–6:1 as the eluent).

Light yellow solid; 51.0 mg, 98% yield; mp 208.0–209.8 °C; >20:1 dr, 98% ee;  $[\alpha]_{\text{D}}^{20} = +294.75$  ( $c$  1.8,  $\text{CH}_2\text{Cl}_2$ ).

The ee was determined by HPLC (Chiralpak IC, ethanol/*n*-hexane 10/90, flow rate = 0.8 mL/min,  $\lambda = 254$  nm)  $t_{\text{R}} = 13.6$  min (minor), 9.6 min (major).

**$^1\text{H}$  NMR (400 MHz,  $\text{DMSO}-d_6$ )**  $\delta$  8.98 – 8.12 (m, 2H), 8.01 (d,  $J = 7.7$  Hz, 1H), 7.90 – 7.82 (m, 2H), 7.77 (d,  $J = 7.5$  Hz, 1H), 7.71 (d,  $J = 8.7$  Hz, 1H), 7.53 (t,  $J = 7.5$  Hz, 1H), 7.38 (t,  $J = 7.7$  Hz, 1H), 7.20 – 7.09 (m, 3H), 7.06 (t,  $J = 7.5$  Hz, 1H), 6.99 – 6.35 (m, 2H), 4.03 (s, 3H), 1.43 – 0.79 (m, 9H).

**$^{13}\text{C}$  NMR (101 MHz,  $\text{DMSO}-d_6$ )**  $\delta$  159.0, 158.4, 155.1, 143.0, 140.6, 134.5, 131.6, 131.0, 130.4, 129.5, 127.5, 125.2, 125.1, 123.8, 119.9, 116.7, 116.1, 116.0, 115.9, 115.4, 114.1, 113.1, 109.3, 101.2, 79.3, 72.3, 55.3, 27.6.

**HRMS (ESI-TOF)**  $m/z$   $[\text{M} + \text{H}]^+$  calcd. for  $\text{C}_{31}\text{H}_{28}\text{N}_3\text{O}_5$  522.2023, found 522.2037.

*tert*-Butyl

**((4*cS*,15*aR*)-10-oxo-3-phenyl-10,15-dihydro-4*cH*-naphtho[1'',2'':4',5']furo[2',3':2,3]indolo[2,1-*b*]quinazolin-4*c*-yl)carbamate (3p)**

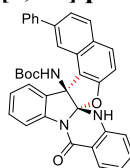

The product was purified by flash column chromatography (petroleum ether : ethyl acetate = 8:1–6:1 as the eluent).

Light yellow solid; 56.3 mg, 99% yield; mp 175.8–177.6 °C; >20:1 dr, 99% ee;  $[\alpha]_{\text{D}}^{20} = +324.4$  ( $c$

2.1, CH<sub>2</sub>Cl<sub>2</sub>).

The ee was determined by HPLC (Chiralpak IC, ethanol/*n*-hexane 10/90, flow rate = 0.8 mL/min,  $\lambda$  = 254 nm)  $t_R$  = 12.3 min (minor), 8.7 min (major).

<sup>1</sup>H NMR (400 MHz, DMSO-*d*<sub>6</sub>)  $\delta$  8.77 (s, 1H), 8.59 – 8.26 (m, 2H), 8.03 (d,  $J$  = 8.6 Hz, 2H), 7.92 (d,  $J$  = 7.5 Hz, 2H), 7.83 (d,  $J$  = 8.8 Hz, 1H), 7.78 – 7.74 (m, 1H), 7.69 (d,  $J$  = 7.4 Hz, 1H), 7.61 (t,  $J$  = 7.7 Hz, 2H), 7.57 – 7.52 (m, 1H), 7.50 – 7.45 (m, 1H), 7.38 (t,  $J$  = 7.7 Hz, 1H), 7.25 – 6.78 (m, 5H), 1.28 – 0.96 (m, 9H).

<sup>13</sup>C NMR (101 MHz, DMSO-*d*<sub>6</sub>)  $\delta$  159.0, 155.3, 155.0, 143.0, 140.7, 140.3, 139.0, 134.6, 130.4, 130.1, 129.5, 129.3, 129.04, 128.95, 128.0, 127.5, 127.2, 125.3, 124.0, 122.9, 120.0, 119.2, 117.8, 116.2, 116.0, 114.1, 113.4, 112.1, 79.5, 72.4, 27.6.

HRMS (ESI-TOF)  $m/z$  [M + H]<sup>+</sup> calcd. for C<sub>36</sub>H<sub>30</sub>N<sub>3</sub>O<sub>4</sub> 568.2231, found 568.2232.

*tert*-Butyl

((4*cS*,15*aR*)-3-bromo-10-oxo-10,15-dihydro-4*cH*-naphtho[1'',2'':4',5']furo[2',3':2,3]indolo[2,1-*b*]quinazolin-4*c*-yl)carbamate (3q)

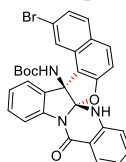

The product was purified by flash column chromatography (petroleum ether : ethyl acetate = 8:1–6:1 as the eluent).

Light yellow solid; 56.5 mg, 99% yield; mp 205.9–207.2 °C; >20:1 dr, 95% ee; [ $\alpha$ ]<sub>D</sub><sup>20</sup> = + 290.13 (*c* 0.4, CH<sub>2</sub>Cl<sub>2</sub>).

The ee was determined by HPLC (Chiralpak IC, ethanol/*n*-hexane 10/90, flow rate = 0.8 mL/min,  $\lambda$  = 254 nm)  $t_R$  = 9.2 min (minor), 7.7 min (major).

<sup>1</sup>H NMR (400 MHz, DMSO-*d*<sub>6</sub>)  $\delta$  9.02 – 8.36 (m, 2H), 8.29 (d,  $J$  = 8.1 Hz, 1H), 8.00 (d,  $J$  = 7.8 Hz, 1H), 7.90 (d,  $J$  = 8.8 Hz, 1H), 7.84 (d,  $J$  = 8.8 Hz, 1H), 7.68 – 7.47 (m, 3H), 7.42 – 7.33 (m, 1H), 7.23 – 6.76 (m, 5H), 1.29 – 0.69 (m, 9H).

<sup>13</sup>C NMR (101 MHz, DMSO-*d*<sub>6</sub>)  $\delta$  158.9, 155.4, 155.1, 143.0, 140.7, 134.6, 131.6, 130.8, 130.3, 129.6, 128.1, 127.4, 126.5, 125.3, 123.8, 121.4, 120.0, 117.0, 116.3, 116.0, 113.9, 113.6, 112.7, 79.5, 72.1, 27.6.

HRMS (ESI-TOF)  $m/z$  [M + H]<sup>+</sup> calcd. for C<sub>30</sub>H<sub>25</sub>BrN<sub>3</sub>O<sub>4</sub> 570.1023, found 570.1029.

*tert*-Butyl

((4*cS*,15*aR*)-2-ethyl-10-oxo-10,15-dihydro-4*cH*-naphtho[1'',2'':4',5']furo[2',3':2,3]indolo[2,1-*b*]quinazolin-4*c*-yl)carbamate (3r)

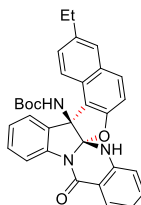

The product was purified by flash column chromatography (petroleum ether : ethyl acetate = 8:1–6:1 as the eluent).

Light yellow solid; 51.4 mg, 99% yield; mp 128.4–130.2 °C; >20:1 dr, 98% ee; [ $\alpha$ ]<sub>D</sub><sup>20</sup> = + 306.75 (*c* 0.7, CH<sub>2</sub>Cl<sub>2</sub>).

The ee was determined by HPLC (Chiralpak IC, ethanol/*n*-hexane 10/90, flow rate = 0.8 mL/min,  $\lambda$  = 254 nm)  $t_R$  = 12.7 min (minor), 8.6 min (major).

**<sup>1</sup>H NMR (400 MHz, DMSO-*d*<sub>6</sub>)**  $\delta$  9.02 – 8.36 (m, 2H), 8.29 (d,  $J$  = 8.1 Hz, 1H), 8.01 (d,  $J$  = 7.6 Hz, 1H), 7.73 (d,  $J$  = 9.4 Hz, 3H), 7.62 (d,  $J$  = 8.5 Hz, 1H), 7.53 (t,  $J$  = 7.2 Hz, 1H), 7.35 (t,  $J$  = 7.7 Hz, 1H), 7.27 – 6.44 (m, 5H), 2.77 (q,  $J$  = 7.5 Hz, 2H), 1.34 – 0.59 (m, 12H).

**<sup>13</sup>C NMR (101 MHz, DMSO-*d*<sub>6</sub>)**  $\delta$  158.9, 155.0, 154.0, 143.1, 140.9, 138.7, 134.5, 130.2, 130.0, 129.2, 128.8, 127.5, 127.36, 127.35, 127.0, 125.0, 123.5, 122.3, 119.8, 117.5, 116.2, 115.7, 114.0, 112.9, 111.8, 79.3, 72.5, 28.1, 27.5, 15.5.

**HRMS (ESI-TOF)**  $m/z$   $[M + H]^+$  calcd. for C<sub>32</sub>H<sub>30</sub>N<sub>3</sub>O<sub>4</sub> 520.2231, found 520.2233.

*tert*-Butyl

**((4*cS*,15*aR*)-2-bromo-10-oxo-10,15-dihydro-4*cH*-naphtho[1'',2'':4',5']furo[2',3':2,3]indolo[2,1-*b*]quinazolin-4*c*-yl)carbamate (3s)**

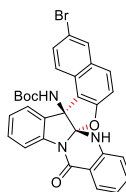

The product was purified by flash column chromatography (petroleum ether : ethyl acetate = 8:1 – 6:1 as the eluent).

Light yellow solid; 56.3 mg, 99% yield; mp 170.4–171.9 °C; >20:1 dr, 95% ee;  $[\alpha]_D^{20}$  = + 143.43 ( $c$  0.7, CH<sub>2</sub>Cl<sub>2</sub>).

The ee was determined by HPLC (Chiralpak IC, ethanol/*n*-hexane 10/90, flow rate = 0.8 mL/min,  $\lambda$  = 254 nm)  $t_R$  = 11.7 min (minor), 8.3 min (major).

**<sup>1</sup>H NMR (400 MHz, DMSO-*d*<sub>6</sub>)**  $\delta$  8.85 – 8.41 (m, 2H), 8.29 (d,  $J$  = 8.1 Hz, 1H), 8.22 (s, 1H), 8.01 (d,  $J$  = 7.8 Hz, 1H), 7.90 – 7.77 (m, 2H), 7.74 – 7.64 (m, 1H), 7.58 – 7.50 (m, 1H), 7.41 – 7.31 (m, 1H), 7.29 – 6.95 (m, 5H), 1.40 – 0.61 (m, 9H).

**<sup>13</sup>C NMR (101 MHz, DMSO-*d*<sub>6</sub>)**  $\delta$  158.9, 154.9, 143.0, 140.8, 134.6, 131.0, 131.0, 130.5, 130.0, 129.3, 127.6, 127.5, 125.1, 124.4, 123.5, 119.9, 118.0, 116.3, 116.2, 115.8, 113.9, 113.5, 113.4, 113.2, 79.3, 72.2, 27.5.

**HRMS (ESI-TOF)**  $m/z$   $[M + H]^+$  calcd. for C<sub>30</sub>H<sub>25</sub>BrN<sub>3</sub>O<sub>4</sub> 570.1023, found 570.1029.

*tert*-Butyl

**((4*cS*,15*aR*)-10-oxo-2-phenyl-10,15-dihydro-4*cH*-naphtho[1'',2'':4',5']furo[2',3':2,3]indolo[2,1-*b*]quinazolin-4*c*-yl)carbamate (3t)**

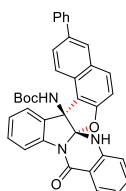

The product was purified by flash column chromatography (petroleum ether : ethyl acetate = 8:1 – 6:1 as the eluent).

Light yellow solid; 55.5 mg, 98% yield; mp 170.6–172.1 °C; >20:1 dr, 98% ee;  $[\alpha]_D^{20}$  = + 296.6 ( $c$  1.9, CH<sub>2</sub>Cl<sub>2</sub>).

The ee was determined by HPLC (Chiralpak IC, ethanol/*n*-hexane 10/90, flow rate = 0.8 mL/min,  $\lambda$  = 254 nm)  $t_R$  = 14.4 min (minor), 10.0 min (major).

**<sup>1</sup>H NMR (400 MHz, DMSO-*d*<sub>6</sub>)** δ 9.23 – 8.48 (m, 2H), 8.33 (d, *J* = 8.1 Hz, 1H), 8.29 – 8.25 (m, 1H), 8.13 – 8.07 (m, 1H), 8.07 – 8.00 (m, 1H), 7.90 (d, *J* = 8.9 Hz, 1H), 7.83 (d, *J* = 7.3 Hz, 2H), 7.80 – 7.73 (m, 1H), 7.58 – 7.49 (m, 3H), 7.43 – 7.33 (m, 2H), 7.28 – 6.79 (m, 5H), 1.28 – 0.74 (m, 9H).

**<sup>13</sup>C NMR (101 MHz, DMSO-*d*<sub>6</sub>)** δ 159.0, 155.1, 154.8, 143.1, 140.9, 139.8, 135.1, 134.6, 132.0, 131.3, 130.2, 129.3, 129.1, 128.2, 127.6, 127.5, 126.7, 126.5, 125.1, 123.6, 123.0, 119.9, 117.7, 116.3, 115.8, 114.1, 113.3, 112.4, 79.4, 72.4, 27.6.

**HRMS (ESI-TOF)** *m/z* [M + H]<sup>+</sup> calcd. for C<sub>36</sub>H<sub>30</sub>N<sub>3</sub>O<sub>4</sub> 568.2231, found 568.2233.

**methyl (4c*S*,15a*R*)-4c-((*tert*-butoxycarbonyl)amino)-10-oxo-10,15-dihydro-4c*H*-naphtho[1'',2'':4',5']furo[2',3':2,3]indolo[2,1-*b*]quinazoline-2-carboxylate (3u)**

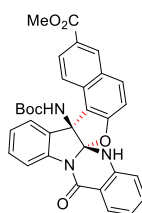

The product was purified by flash column chromatography (petroleum ether : ethyl acetate = 8:1–6:1 as the eluent).

Light yellow solid; 54.2 mg, 99% yield; mp 215.0–216.8 °C; >20:1 dr, 97% ee; [α]<sub>D</sub><sup>20</sup> = +186.00 (*c* 0.8, CH<sub>2</sub>Cl<sub>2</sub>).

**The ee was determined by HPLC** (Chiralpak IC, ethanol/*n*-hexane 10/90, flow rate = 0.8 mL/min, λ = 254 nm) *t*<sub>R</sub> = 24.8 min (minor), 18.3 min (major).

**<sup>1</sup>H NMR (400 MHz, DMSO-*d*<sub>6</sub>)** δ 8.99 – 8.48 (m, 3H), 8.29 (d, *J* = 8.1 Hz, 1H), 8.21 (d, *J* = 8.8 Hz, 1H), 8.06 (d, *J* = 8.9 Hz, 1H), 8.01 (d, *J* = 7.7 Hz, 1H), 7.80 – 7.64 (m, 1H), 7.54 (t, *J* = 7.4 Hz, 1H), 7.42 – 7.31 (m, 1H), 7.19 (d, *J* = 8.8 Hz, 1H), 7.17 – 7.11 (m, 2H), 7.11 – 6.83 (m, 2H), 3.92 (s, 3H), 1.44 – 0.67 (m, 9H).

**<sup>13</sup>C NMR (101 MHz, DMSO-*d*<sub>6</sub>)** δ 166.3, 158.9, 156.6, 154.9, 142.9, 140.8, 134.6, 132.7, 132.0, 131.4, 129.4, 128.8, 127.5, 126.6, 125.2, 124.4, 123.3, 120.0, 118.1, 116.2, 116.0, 115.8, 113.9, 113.7, 113.1, 79.4, 72.1, 52.2, 27.5.

**HRMS (ESI-TOF)** *m/z* [M + H]<sup>+</sup> calcd. for C<sub>32</sub>H<sub>28</sub>N<sub>3</sub>O<sub>6</sub> 550.1973, found 520.1986.

***tert*-Butyl ((3c*S*,14a*R*)-1-methyl-9-oxo-9,14-dihydroindolo[4'',5'':4',5']furo[2',3':2,3]indolo[2,1-*b*]quinazolin-3c(1*H*)-yl)carbamate (3w)**

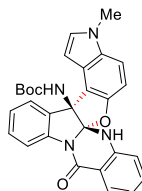

The product was purified by flash column chromatography (petroleum ether : ethyl acetate = 8:1–6:1 as the eluent).

Light yellow solid; 46.4 mg, 94% yield; mp 158.3–160.9 °C; >20:1 dr, 54% ee; [α]<sub>D</sub><sup>20</sup> = –124.2 (*c* 1.6, CH<sub>2</sub>Cl<sub>2</sub>).

**The ee was determined by HPLC** (Chiralpak AD-H, isopropanol/*n*-hexane 30/70, flow rate = 1.0

mL/min,  $\lambda$  = 254 nm)  $t_R$  = 29.0 min (minor), 22.7 min (major).

**$^1\text{H}$  NMR (400 MHz, DMSO- $d_6$ )**  $\delta$  8.86 (s, 1H), 8.52 (dd,  $J$  = 8.4, 1.1 Hz, 1H), 8.28 (dd,  $J$  = 8.1, 1.5 Hz, 2H), 7.93 – 7.79 (m, 1H), 7.72 (d,  $J$  = 8.1 Hz, 1H), 7.64 – 7.50 (m, 3H), 7.44 (t,  $J$  = 7.4 Hz, 1H), 7.15 (d,  $J$  = 8.8 Hz, 2H), 6.86 (s, 1H), 6.64 (dd,  $J$  = 8.7, 2.3 Hz, 1H), 3.58 (s, 3H), 1.45 – 0.64 (m, 9H).

**$^{13}\text{C}$  NMR (101 MHz, DMSO- $d_6$ )**  $\delta$  160.8, 159.3, 150.7, 147.1, 138.8, 134.8, 132.1, 129.2, 128.7, 127.5, 127.1, 126.8, 126.4, 125.6, 123.7, 120.8, 116.0, 111.9, 110.4, 110.2, 105.6, 78.8, 63.3, 32.5, 27.6.

**HRMS (ESI-TOF)**  $m/z$   $[\text{M} + \text{H}]^+$  calcd. for  $\text{C}_{29}\text{H}_{27}\text{N}_4\text{O}_4$  495.2027, found 495.2029.

## 5. General procedure for the synthesis of compounds 5

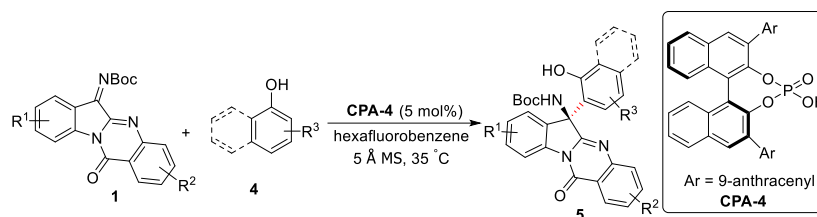

In an oven-dried tube, CPA-4 (0.005 mmol), ketimines **1** (0.1 mmol), dry 5 Å MS (50 mg), and hexafluorobenzene (4.0 ml) were added. To this suspension, 1-naphthol or substituted phenol **4** (0.12 mmol) was then added. The resulting reaction mixture was stirred at 35 °C until the reaction was complete (monitored by TLC). The reaction mixture was concentrated under vacuum, and the residue was purified by flash chromatography on silica gel (petroleum ether : ethylacetate = 8:1–3:1) to give the product **5**.

***tert*-Butyl (S)-(6-(1-hydroxynaphthalen-2-yl)-12-oxo-6,12-dihydroindolo[2,1-*b*]quinazolin-6-yl)carbamate (5a)**

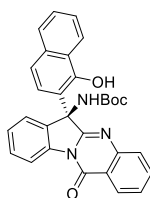

The product was purified by flash column chromatography (petroleum ether : ethyl acetate = 8:1–3:1 as the eluent).

White solid; 48.6 mg, 99% yield; mp 137.5–139.6 °C; 65% ee;  $[\alpha]_{\text{D}}^{20}$  = –248.44 ( $c$  2.0,  $\text{CH}_2\text{Cl}_2$ ).

**The ee was determined by HPLC** (Chiralpak AD-H, isopropanol/*n*-hexane 15/85, flow rate = 1.0 mL/min,  $\lambda$  = 254 nm)  $t_R$  = 12.6 min (minor), 13.6 min (major).

**$^1\text{H}$  NMR (400 MHz, DMSO- $d_6$ )**  $\delta$  10.64 (s, 1H), 8.50 (d,  $J$  = 8.0 Hz, 2H), 8.33 (dd,  $J$  = 8.0, 1.5 Hz, 1H), 8.16 (d,  $J$  = 8.3 Hz, 1H), 7.92 – 7.84 (m, 1H), 7.81 (d,  $J$  = 7.4 Hz, 1H), 7.74 (d,  $J$  = 8.0 Hz, 1H), 7.62 (t,  $J$  = 7.5 Hz, 1H), 7.54 (t,  $J$  = 7.7 Hz, 1H), 7.52 – 7.27 (m, 6H), 1.05 (s, 9H).

**$^{13}\text{C}$  NMR (101 MHz, DMSO- $d_6$ )**  $\delta$  162.89, 159.00, 154.37, 151.38, 146.14, 139.53, 134.99, 134.04, 133.63, 129.21, 127.39, 127.30, 126.91, 126.78, 126.74, 126.57, 125.87, 125.23, 125.06, 124.48, 122.40, 121.21, 119.13, 118.64, 115.99, 79.12, 65.98, 27.66.

**HRMS (ESI-TOF)**  $m/z$   $[\text{M} + \text{H}]^+$  calcd. for  $\text{C}_{30}\text{H}_{26}\text{N}_3\text{O}_4$  492.1918, found 492.1924.

***tert*-Butyl (S)-(6-(1-hydroxynaphthalen-2-yl)-3-methyl-12-oxo-6,12-dihydroindolo[2,1-*b*]quinazolin-6-yl)carbamate (5b)**

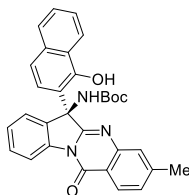

The product was purified by flash column chromatography (petroleum ether : ethyl acetate = 8:1–3:1 as the eluent).

White solid; 49.5 mg, 98% yield; mp 153.5–155.3 °C; 72% ee;  $[\alpha]_D^{20} = -230.07$  (*c* 2.2, CH<sub>2</sub>Cl<sub>2</sub>).

**The ee was determined by HPLC** (Chiralpak AD-H, isopropanol/*n*-hexane 15/85, flow rate = 1.0 mL/min,  $\lambda$  = 254 nm)  $t_R$  = 20.7 min (minor), 11.9 min (major).

**<sup>1</sup>H NMR (400 MHz, DMSO-*d*<sub>6</sub>)**  $\delta$  10.87 (s, 1H), 8.51 (d, *J* = 8.0 Hz, 1H), 8.47 (s, 1H), 8.21 (d, *J* = 7.8 Hz, 1H), 8.10 (s, 1H), 7.78 (dd, *J* = 7.4, 1.9 Hz, 1H), 7.69–7.60 (m, 2H), 7.59–7.39 (m, 5H), 7.36 (d, *J* = 8.9 Hz, 1H), 7.28 (d, *J* = 8.8 Hz, 1H), 2.46 (s, 3H), 1.04 (s, 9H).

**<sup>13</sup>C NMR (101 MHz, DMSO-*d*<sub>6</sub>)**  $\delta$  162.1, 158.9, 154.3, 151.7, 143.9, 139.6, 137.3, 136.2, 134.1, 133.4, 129.3, 127.3, 126.8, 126.7, 126.6, 126.0, 125.3, 125.1, 124.7, 122.5, 121.0, 119.1, 118.3, 116.1, 79.1, 66.0, 27.6, 20.8.

**HRMS (ESI-TOF)**  $m/z$  [M + H]<sup>+</sup> calcd. for C<sub>31</sub>H<sub>28</sub>N<sub>3</sub>O<sub>4</sub> 506.2074, found 506.2081.

***tert*-Butyl (S)-(3-bromo-6-(1-hydroxynaphthalen-2-yl)-12-oxo-6,12-dihydroindolo[2,1-*b*]quinazolin-6-yl)carbamate (5c)**

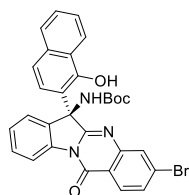

The product was purified by flash column chromatography (petroleum ether : ethyl acetate = 8:1–3:1 as the eluent).

White solid; 56.4 mg, 99% yield; mp 139.3–141.1 °C; 73% ee;  $[\alpha]_D^{20} = -268.36$  (*c* 1.9, CH<sub>2</sub>Cl<sub>2</sub>).

**The ee was determined by HPLC** (Chiralpak AD-H, isopropanol/*n*-hexane 15/85, flow rate = 1.0 mL/min,  $\lambda$  = 254 nm)  $t_R$  = 19.2 min (minor), 11.1 min (major).

**<sup>1</sup>H NMR (400 MHz, DMSO-*d*<sub>6</sub>)**  $\delta$  10.33 (s, 1H), 8.59–8.44 (m, 2H), 8.41 (d, *J* = 2.4 Hz, 1H), 8.10 (d, *J* = 8.4 Hz, 1H), 8.00 (dd, *J* = 8.6, 2.4 Hz, 1H), 7.81 (d, *J* = 7.9 Hz, 1H), 7.68 (d, *J* = 8.7 Hz, 1H), 7.58–7.31 (m, 7H), 1.06 (s, 9H).

**<sup>13</sup>C NMR (101 MHz, DMSO-*d*<sub>6</sub>)**  $\delta$  163.5, 157.9, 154.4, 150.8, 145.5, 139.3, 137.7, 134.0, 133.9, 129.4, 129.2, 128.6, 127.4, 127.0, 126.8, 125.7, 125.3, 125.0, 124.3, 122.9, 122.3, 119.8, 119.4, 119.2, 116.0, 79.2, 65.8, 27.7.

**HRMS (ESI-TOF)**  $m/z$  [M + H]<sup>+</sup> calcd. for C<sub>30</sub>H<sub>25</sub>N<sub>3</sub>O<sub>4</sub>Br 572.1008, found 572.1016.

***tert*-Butyl (S)-(8-fluoro-6-(1-hydroxynaphthalen-2-yl)-12-oxo-6,12-dihydroindolo[2,1-*b*]quinazolin-6-yl)carbamate (5d)**

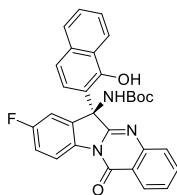

The product was purified by flash column chromatography (petroleum ether : ethyl acetate = 8:1–3:1 as the eluent).

White solid; 50.3 mg, 99% yield; mp 124.4–126.9 °C; 71% ee;  $[\alpha]_{\text{D}}^{20} = -318.97$  ( $c$  1.8,  $\text{CH}_2\text{Cl}_2$ ).

**The ee was determined by HPLC** (Chiralpak AD-H, isopropanol/*n*-hexane 15/85, flow rate = 1.0 mL/min,  $\lambda$  = 254 nm)  $t_{\text{R}}$  = 9.3 min (minor), 12.7 min (major).

**$^1\text{H}$  NMR (400 MHz,  $\text{DMSO}-d_6$ )**  $\delta$  10.30 (s, 1H), 8.63–8.40 (m, 2H), 8.34 (d,  $J$  = 7.9 Hz, 1H), 8.10 (d,  $J$  = 8.4 Hz, 1H), 7.85 (dd,  $J$  = 12.7, 8.0 Hz, 2H), 7.71 (d,  $J$  = 8.1 Hz, 1H), 7.66–7.53 (m, 2H), 7.51–7.26 (m, 5H), 1.10 (s, 9H).

**$^{13}\text{C}$  NMR (101 MHz,  $\text{DMSO}-d_6$ )**  $\delta$  162.6, 160.5 (d,  $J$  = 244.4 Hz, 1C), 158.9, 154.5, 150.7, 146.5, 136.5 (d,  $J$  = 8.1 Hz, 1C), 136.0 (d,  $J$  = 2.0 Hz, 1C), 134.9, 134.1, 127.43, 127.38, 127.1, 126.8, 126.5, 125.6, 125.3, 125.0, 122.3, 121.2, 119.5, 119.2, 117.4 (d,  $J$  = 8.1 Hz, 1C), 115.6 (d,  $J$  = 23.2 Hz, 1C), 111.6 (d,  $J$  = 25.3 Hz, 1C), 79.4, 65.6, 27.7.

**HRMS (ESI-TOF)**  $m/z$   $[\text{M} + \text{H}]^+$  calcd. for  $\text{C}_{30}\text{H}_{25}\text{N}_3\text{O}_4\text{F}$  510.1824, found 510.1830.

***tert*-Butyl (S)-(8-chloro-6-(1-hydroxynaphthalen-2-yl)-12-oxo-6,12-dihydroindolo[2,1-*b*]quinazolin-6-yl)carbamate (5e)**

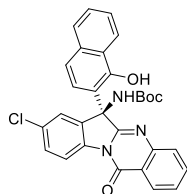

The product was purified by flash column chromatography (petroleum ether : ethyl acetate = 8:1–3:1 as the eluent).

White solid; 51.0 mg, 97% yield; mp 122.8–124.7 °C; 70% ee;  $[\alpha]_{\text{D}}^{20} = -267.6$  ( $c$  2.0,  $\text{CH}_2\text{Cl}_2$ ).

**The ee was determined by HPLC** (Chiralpak AD-H, isopropanol/*n*-hexane 15/85, flow rate = 1.0 mL/min,  $\lambda$  = 254 nm)  $t_{\text{R}}$  = 9.9 min (minor), 13.2 min (major).

**$^1\text{H}$  NMR (400 MHz,  $\text{DMSO}-d_6$ )**  $\delta$  10.17 (s, 1H), 8.50 (d,  $J$  = 8.6 Hz, 2H), 8.35 (dd,  $J$  = 8.0, 1.5 Hz, 1H), 8.07 (d,  $J$  = 8.4 Hz, 1H), 7.93–7.78 (m, 2H), 7.70 (d,  $J$  = 8.0 Hz, 1H), 7.66–7.54 (m, 3H), 7.53–7.44 (m, 3H), 7.41 (t,  $J$  = 7.6 Hz, 1H), 1.11 (s, 9H).

**$^{13}\text{C}$  NMR (101 MHz,  $\text{DMSO}-d_6$ )**  $\delta$  162.2, 159.0, 154.6, 150.4, 146.6, 138.5, 136.4, 135.0, 134.0, 130.6, 129.0, 127.5, 127.4, 127.2, 126.8, 126.6, 125.5, 125.3, 124.9, 123.9, 122.2, 121.1, 119.61, 119.57, 117.3, 79.4, 65.3, 27.7.

**HRMS (ESI-TOF)**  $m/z$   $[\text{M} + \text{H}]^+$  calcd. for  $\text{C}_{30}\text{H}_{25}\text{N}_3\text{O}_4\text{Cl}$  526.1528, found 526.1537.

***tert*-Butyl (S)-(9-chloro-6-(1-hydroxynaphthalen-2-yl)-12-oxo-6,12-dihydroindolo[2,1-*b*]quinazolin-6-yl)carbamate (5f)**

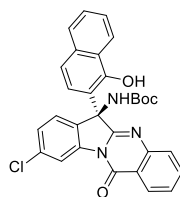

The product was purified by flash column chromatography (petroleum ether : ethyl acetate = 8:1–3:1 as the eluent).

White solid; 52.1 mg, 99% yield; mp 142.8–145.1 °C; 64% ee;  $[\alpha]_D^{20} = -286.8$  (*c* 1.9, CH<sub>2</sub>Cl<sub>2</sub>).

**The ee was determined by HPLC** (Chiralpak AD-H, isopropanol/*n*-hexane 15/85, flow rate = 1.0 mL/min,  $\lambda$  = 254 nm)  $t_R$  = 8.1 min (minor), 12.9 min (major).

**<sup>1</sup>H NMR (400 MHz, DMSO-*d*<sub>6</sub>)**  $\delta$  10.21 (s, 1H), 8.53 (s, 1H), 8.49 (d, *J* = 1.8 Hz, 1H), 8.34 (dd, *J* = 7.9, 1.6 Hz, 1H), 8.06 (d, *J* = 8.4 Hz, 1H), 7.94 – 7.78 (m, 2H), 7.71 (d, *J* = 8.1 Hz, 1H), 7.67 – 7.54 (m, 2H), 7.52 – 7.35 (m, 5H), 1.11 (s, 9H).

**<sup>13</sup>C NMR (101 MHz, DMSO-*d*<sub>6</sub>)**  $\delta$  162.5, 159.1, 154.6, 150.5, 146.5, 140.6, 135.2, 134.0, 133.1, 132.9, 127.5, 127.4, 127.2, 126.7, 126.6, 126.5, 125.6, 125.56, 125.3, 124.9, 122.2, 121.0, 119.5, 119.4, 115.7, 79.4, 65.2, 27.8.

**HRMS (ESI-TOF)** *m/z* [M + H]<sup>+</sup> calcd. for C<sub>30</sub>H<sub>25</sub>N<sub>3</sub>O<sub>4</sub>Cl 526.1528, found 526.1536.

**tert-Butyl (S)-(6-(2-hydroxy-5-methoxyphenyl)-12-oxo-6,12-dihydroindolo[2,1-*b*]quinazolin-6-yl)carbamate (5g)**

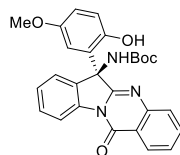

The product was purified by flash column chromatography (petroleum ether : ethyl acetate = 8:1–3:1 as the eluent).

White solid; 46.2 mg, 98% yield; mp 124.1–126.0 °C; 63% ee;  $[\alpha]_D^{20} = -79.3$  (*c* 0.68, CH<sub>2</sub>Cl<sub>2</sub>).

**The ee was determined by HPLC** (Chiralpak IB, ethanol/*n*-hexane 10/90, flow rate = 0.8 mL/min,  $\lambda$  = 254 nm)  $t_R$  = 9.3 min (minor), 13.6 min (major).

**<sup>1</sup>H NMR (400 MHz, CDCl<sub>3</sub>)**  $\delta$  10.86 (s, 1H), 8.63 (d, *J* = 8.0 Hz, 1H), 8.38 (dd, *J* = 7.9, 1.4 Hz, 1H), 7.85 – 7.68 (m, 2H), 7.64 – 7.40 (m, 4H), 7.04 (d, *J* = 8.8 Hz, 1H), 6.80 (dd, *J* = 8.8, 3.0 Hz, 1H), 6.29 (d, *J* = 3.0 Hz, 1H), 6.12 (s, 1H), 3.57 (s, 3H), 1.13 (s, 9H).

**<sup>13</sup>C NMR (101 MHz, CDCl<sub>3</sub>)**  $\delta$  162.8, 159.3, 153.9, 153.3, 150.6, 145.4, 139.9, 134.9, 130.5, 127.7, 127.4, 127.0, 126.8, 125.4, 124.3, 122.0, 117.6, 115.9, 115.2, 81.1, 67.2, 55.8, 28.0.

**HRMS (ESI-TOF)** *m/z* [M + Na]<sup>+</sup> calcd. for C<sub>27</sub>H<sub>25</sub>N<sub>3</sub>O<sub>5</sub>Na 494.1686, found 494.1688.

**tert-Butyl (S)-(6-(2-hydroxy-4,5-dimethoxyphenyl)-12-oxo-6,12-dihydroindolo[2,1-*b*]quinazolin-6-yl)carbamate (5h)**

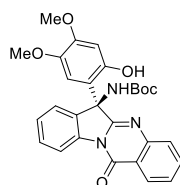

The product was purified by flash column chromatography (petroleum ether : ethyl acetate = 8:1–

3:1 as the eluent).

White solid; 49.6 mg, 99% yield; mp 197.7–199.6 °C; 68% ee;  $[\alpha]_{\text{D}}^{20} = -99.8$  ( $c$  1.5,  $\text{CH}_2\text{Cl}_2$ ).

The ee was determined by HPLC (Chiralpak AD-H, isopropanol/*n*-hexane 15/85, flow rate = 1.0 mL/min,  $\lambda$  = 254 nm)  $t_{\text{R}}$  = 28.8 min (minor), 14.9 min (major).

**$^1\text{H}$  NMR (400 MHz,  $\text{DMSO}-d_6$ )**  $\delta$  9.24 (s, 1H), 8.42 (d,  $J$  = 7.7 Hz, 1H), 8.33 (dd,  $J$  = 7.9, 1.5 Hz, 1H), 8.26 (s, 1H), 7.90 – 7.77 (m, 1H), 7.68 (d,  $J$  = 7.8 Hz, 1H), 7.59 (t,  $J$  = 7.5 Hz, 1H), 7.48 – 7.34 (m, 2H), 7.27 (t,  $J$  = 7.5 Hz, 1H), 7.23 (s, 1H), 6.20 (s, 1H), 3.78 (s, 3H), 3.61 (s, 3H), 1.04 (s, 9H).

**$^{13}\text{C}$  NMR (101 MHz,  $\text{DMSO}-d_6$ )**  $\delta$  162.8, 159.2, 154.5, 149.3, 148.2, 147.1, 141.3, 139.7, 134.6, 134.4, 128.4, 127.2, 126.9, 126.4, 126.3, 123.4, 121.2, 115.9, 115.6, 112.4, 101.2, 79.0, 64.6, 56.5, 55.3, 27.7.

**HRMS (ESI-TOF)**  $m/z$   $[\text{M} + \text{H}]^+$  calcd. for  $\text{C}_{28}\text{H}_{28}\text{N}_3\text{O}_6$  502.1973, found 502.1975.

## 6. Gram-scale experiment

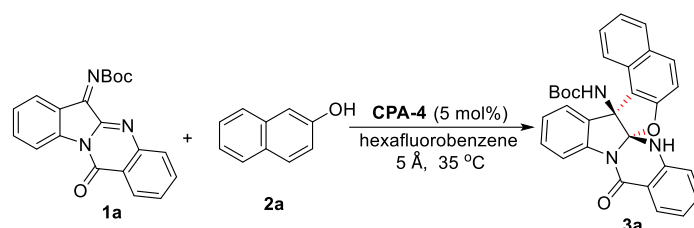

In a 150 mL dry round bottom flask equipped with a magnetic stirring bar, the ketimine **1a** (2.5 mmol, 1.0 equiv) were added to a solution of 2-naphthol **2a** (3.0 mmol, 1.2 equiv) and **CPA-4** (5 mol %) in hexafluorobenzene (100 mL) at 35 °C. And then, the mixture was stirred at the same temperature for 23 h. After completion of the reaction (monitored by TLC), the hexafluorobenzene was removed under vacuum and the residues were isolated by flash chromatography on silica gel (petroleum ether/ethyl acetate = 8:1–6:1) to give the product **3a** as a light yellow solid, 1.22 g, 99% yield, >20:1 dr and 98% ee.

## 7. Control experiment

In an oven-dried tube, **CPA-4** (0.005 mmol), ketimines **1** (0.1 mmol), dry 5 Å MS (50 mg), and hexafluorobenzene (4.0 ml) were added. To this suspension, 2-methoxynaphthalene **6** (0.12 mmol) was then added. The resulting reaction mixture was stirred at 35 °C for 24 h. TLC analysis showed no reaction taking place.

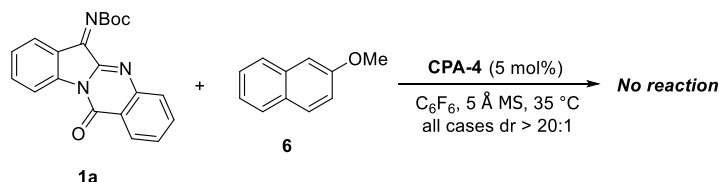

## 8. X-ray Crystal Structure of Compounds 3f and 5a

Single crystals of compound **3f** were prepared from the DMSO. For the X-ray analysis of compounds **3f**, a suitable crystal was selected for structure determination on a Xcalibur, Eos, Gemini diffractometer. Each crystal was kept at 293(2) K during data collection. Using Olex2<sup>2</sup>, the structure was solved with the ShelXS<sup>3</sup> structure solution program using Direct Methods and refined with the ShelXL<sup>3</sup> refinement package using Least Squares minimisation.

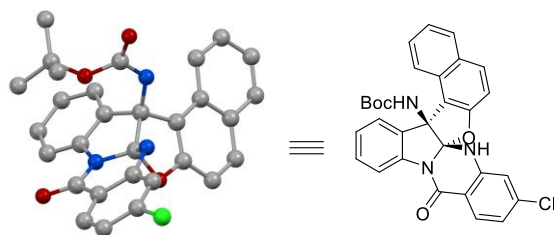

ORTEP of **3f** (at 50% level)

Crystal data and structure refinement (after solvents removal) for **3f** (CCDC-2312826)

|                                             |                                                                   |
|---------------------------------------------|-------------------------------------------------------------------|
| Identification code                         | <b>3f</b> •DMSO                                                   |
| Empirical formula                           | C <sub>32</sub> H <sub>30</sub> ClN <sub>3</sub> O <sub>5</sub> S |
| Formula weight                              | 604.10                                                            |
| Temperature/K                               | 293(2)                                                            |
| Crystal system                              | monoclinic                                                        |
| Space group                                 | P2 <sub>1</sub>                                                   |
| a/Å                                         | 9.0863(5)                                                         |
| b/Å                                         | 16.8287(11)                                                       |
| c/Å                                         | 9.8355(6)                                                         |
| α/°                                         | 90                                                                |
| β/°                                         | 91.730(5)                                                         |
| γ/°                                         | 90                                                                |
| Volume/Å <sup>3</sup>                       | 1503.27(16)                                                       |
| Z                                           | 2                                                                 |
| ρ <sub>calc</sub> /g/cm <sup>3</sup>        | 1.335                                                             |
| μ/mm <sup>-1</sup>                          | 2.148                                                             |
| F(000)                                      | 632.0                                                             |
| Crystal size/mm <sup>3</sup>                | 0.2 × 0.15 × 0.1                                                  |
| Radiation                                   | CuKα (λ = 1.54184)                                                |
| 2θ range for data collection/°              | 8.996 to 143.38                                                   |
| Index ranges                                | -11 ≤ h ≤ 8, -17 ≤ k ≤ 20, -11 ≤ l ≤ 11                           |
| Reflections collected                       | 10152                                                             |
| Independent reflections                     | 4993 [R <sub>int</sub> = 0.0299, R <sub>sigma</sub> = 0.0430]     |
| Data/restraints/parameters                  | 4993/26/407                                                       |
| Goodness-of-fit on F <sup>2</sup>           | 1.042                                                             |
| Final R indexes [I >= 2σ (I)]               | R <sub>1</sub> = 0.0499, wR <sub>2</sub> = 0.1190                 |
| Final R indexes [all data]                  | R <sub>1</sub> = 0.0606, wR <sub>2</sub> = 0.1306                 |
| Largest diff. peak/hole / e Å <sup>-3</sup> | 0.35/-0.34                                                        |
| Flack parameter                             | -0.026(19)                                                        |

Single crystals of compound *rac*-**5a** were prepared from the mixture solvent of ethyl acetate and hexane. For the X-ray analysis of compounds *rac*-**5a**, a suitable crystal was selected for structure determination on a Xcalibur, Eos, Gemini diffractometer. Each crystal was kept at 293(2) K during data collection. Using Olex2<sup>2</sup>, the structure was solved with the ShelXS<sup>3</sup> structure solution program

using Direct Methods and refined with the ShelXL<sup>3</sup> refinement package using Least Squares minimisation.

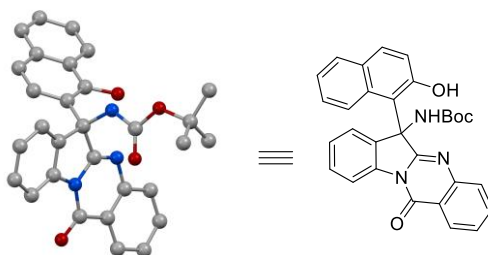

ORTEP of *rac*-**5a** (at 50% level)

Crystal data and structure refinement (after solvents removal) for *rac*-**5a** (CCDC-2312827)

|                                             |                                                               |
|---------------------------------------------|---------------------------------------------------------------|
| Identification code                         | <i>rac</i> - <b>5a</b>                                        |
| Empirical formula                           | C <sub>30</sub> H <sub>25</sub> N <sub>3</sub> O <sub>4</sub> |
| Formula weight                              | 491.53                                                        |
| Temperature/K                               | 193.0                                                         |
| Crystal system                              | monoclinic                                                    |
| Space group                                 | P2 <sub>1</sub> /n                                            |
| a/Å                                         | 7.7314(12)                                                    |
| b/Å                                         | 20.881(3)                                                     |
| c/Å                                         | 15.894(3)                                                     |
| α/°                                         | 90                                                            |
| β/°                                         | 101.278(9)                                                    |
| γ/°                                         | 90                                                            |
| Volume/Å <sup>3</sup>                       | 2516.4(7)                                                     |
| Z                                           | 4                                                             |
| ρ <sub>calc</sub> /g/cm <sup>3</sup>        | 1.297                                                         |
| μ/mm <sup>-1</sup>                          | 0.454                                                         |
| F(000)                                      | 1032.0                                                        |
| Crystal size/mm <sup>3</sup>                | 0.03 × 0.02 × 0.02                                            |
| Radiation                                   | GaKα (λ = 1.34139)                                            |
| 2θ range for data collection/°              | 10.8 to 111.182                                               |
| Index ranges                                | -9 ≤ h ≤ 9, -25 ≤ k ≤ 25, -19 ≤ l ≤ 19                        |
| Reflections collected                       | 15091                                                         |
| Independent reflections                     | 4819 [R <sub>int</sub> = 0.1088, R <sub>sigma</sub> = 0.1147] |
| Data/restraints/parameters                  | 4819/0/338                                                    |
| Goodness-of-fit on F <sup>2</sup>           | 0.958                                                         |
| Final R indexes [I ≥ 2σ (I)]                | R <sub>1</sub> = 0.0740, wR <sub>2</sub> = 0.1687             |
| Final R indexes [all data]                  | R <sub>1</sub> = 0.1521, wR <sub>2</sub> = 0.2145             |
| Largest diff. peak/hole / e Å <sup>-3</sup> | 0.36/-0.37                                                    |

## 9. General experimental procedures for in vitro cytotoxicity assay

The human leukemia cells K562 were purchased from Chinese Academy of Sciences, Kunming Cell Bank. All the cells were cultured in RPMI-1640 medium (GIBICO, USA), supplemented with 10% fetal bovine serum (Hyclone, USA) and Penicillin-Streptomycin (respectively 100 U/mL) in 5% CO<sub>2</sub> at 37 °C. The cytotoxicity assay was performed according to the MTT (3-(4,5-dimethylthiazol-2-yl)-2,5-diphenyl tetrazolium bromide) method in 96-well microplates. Briefly, 5000 cells were seeded into each well of 96-well cell culture plates and allowed to grow for 24 h before the drug is added. K562 tumor cell line was exposed to compounds (**3c**, **3d**, **3e**, **3i**, **3j**, **3l**, **3m**, **3s**, *rac*-**3i**, and *rac*-**3j**) at the concentrations of 1, 2, 4, 8 and 20 μmol·L<sup>-1</sup> in triplicates for 48 h, comparable to cisplatin (Aladdin, China). Then the MTT reagent was added to reaction with the cancer cells for 4 hours. At least, measure the OD value at 490 wavelengths. The average 50% inhibitory concentration (IC<sub>50</sub>) of all the compounds is calculated by IBM SPSS Statistics (version 19). Each concentration was analyzed in triplicate at least, and the whole experiment was repeated three times.

**Table S1. Cell Inhibitory Assay of target products in K562 Cells**

| compound                      | IC <sub>50</sub> (μM) <sup>a</sup> |
|-------------------------------|------------------------------------|
| <b>3c</b>                     | 27.22                              |
| <b>3d</b>                     | 47.6775                            |
| <b>3e</b>                     | 55.5635                            |
| <b>3i</b>                     | 21.4195                            |
| <b>3j</b>                     | 21.326                             |
| <b>3l</b>                     | 31.31                              |
| <b>3m</b>                     | 27.449                             |
| <b>3s</b>                     | 27.456                             |
| <i>rac</i> - <b>3i</b>        | 26.5132                            |
| <i>rac</i> - <b>3j</b>        | 25.7016                            |
| <b>cisplatin</b> <sup>b</sup> | 23.734                             |

<sup>a</sup>IC<sub>50</sub> is the concentration of a compound that affords a 50% reduction in cell growth (after 48 h of incubation), expressed as the mean of triplicate experiments. <sup>b</sup>Commercially available broad-spectrum anticancer drug cisplatin as a positive control.

## 10. References

1. Gahtory, D.; Chouhan, M.; Sharma, R.; Nair, V. A. *Org. Lett.* **2013**, *15*, 3942–3945
2. Dolomanov, O. V.; Bourhis, L. J.; Gildea, R. J.; Howard, J. A. K.; Puschmann, H. *J. Appl. Cryst.* **2009**, *42*, 339–341.
3. Sheldrick, G. M. *Acta Cryst.* **2008**, A64, 112–122.
4. Sheldrick, G. M. *Acta Cryst.* **2015**, C71, 3–8.

## 11. HPLC spectra of compounds 3 and 5

HPLC spectra of **3a**

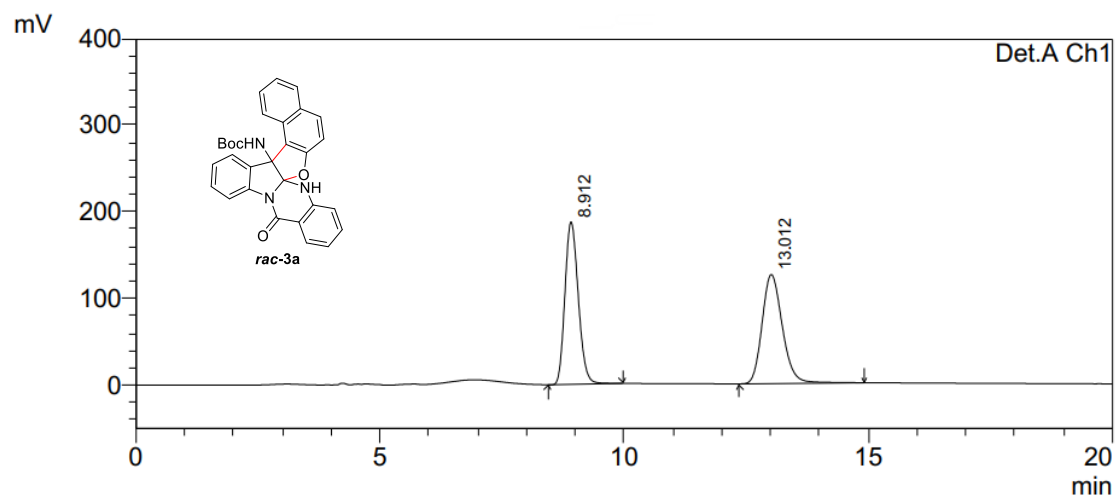

1 Det.A Ch1/254nm

PeakTable

Detector A Ch1 254nm

| Peak# | Ret. Time | Area    | Height | Area %  |
|-------|-----------|---------|--------|---------|
| 1     | 8.912     | 3568794 | 187432 | 49.543  |
| 2     | 13.012    | 3634693 | 125759 | 50.457  |
| Total |           | 7203487 |        | 100.000 |

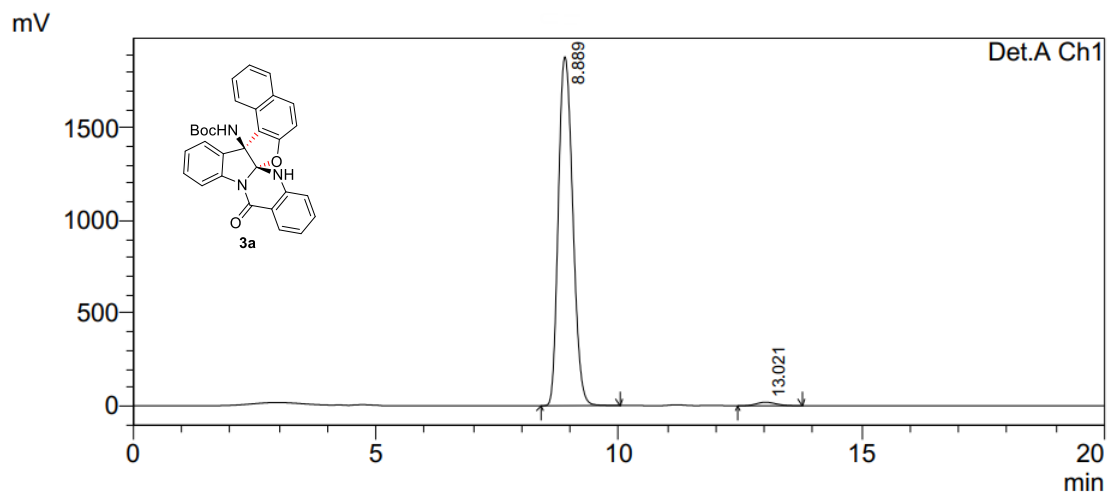

1 Det.A Ch1/254nm

PeakTable

Detector A Ch1 254nm

| Peak# | Ret. Time | Area     | Height  | Area %  |
|-------|-----------|----------|---------|---------|
| 1     | 8.889     | 38850562 | 1885442 | 98.619  |
| 2     | 13.021    | 543957   | 19260   | 1.381   |
| Total |           | 39394519 |         | 100.000 |

# HPLC spectra of **3b**

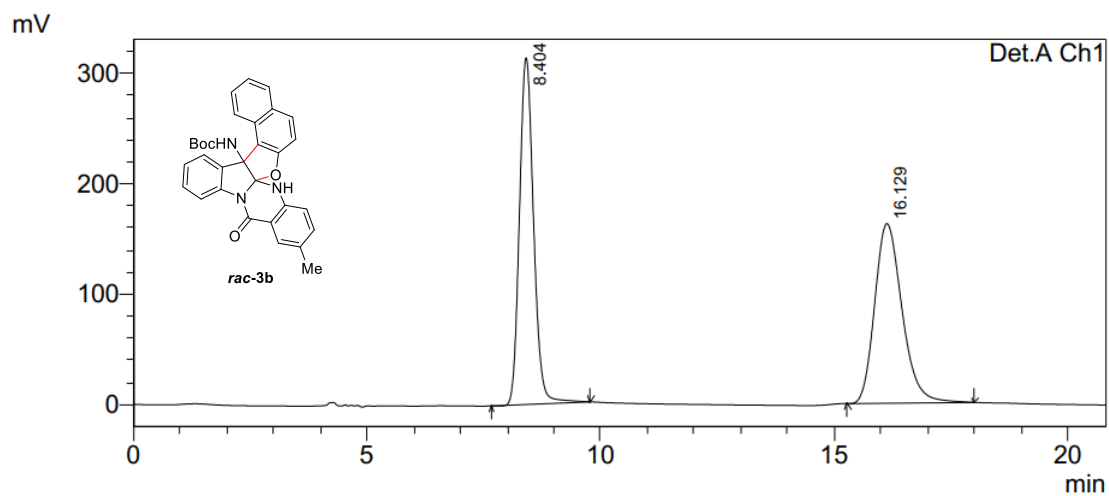

1 Det.A Ch1/254nm

PeakTable

Detector A Ch1 254nm

| Peak# | Ret. Time | Area     | Height | Area %  |
|-------|-----------|----------|--------|---------|
| 1     | 8.404     | 6607530  | 314262 | 49.902  |
| 2     | 16.129    | 6633535  | 162895 | 50.098  |
| Total |           | 13241065 |        | 100.000 |

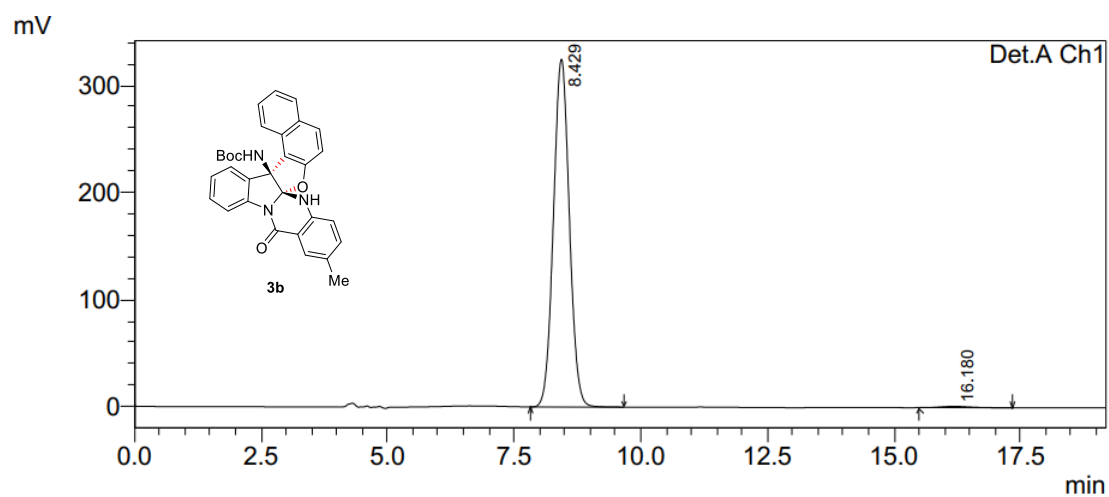

1 Det.A Ch1/254nm

PeakTable

Detector A Ch1 254nm

| Peak# | Ret. Time | Area    | Height | Area %  |
|-------|-----------|---------|--------|---------|
| 1     | 8.429     | 7100134 | 324987 | 99.313  |
| 2     | 16.180    | 49139   | 1242   | 0.687   |
| Total |           | 7149273 |        | 100.000 |

# HPLC spectra of 3c

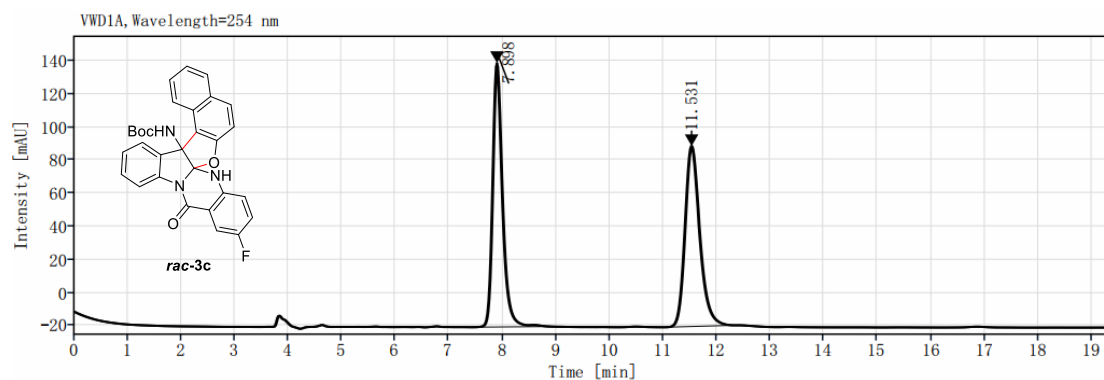

Signal: VWD1A, Wavelength=254 nm

| Retention Time [min] | Peak Width [min] | Peak Height [mAU] | Peak Height % | Peak Area [mAU*s] | Peak Area % |
|----------------------|------------------|-------------------|---------------|-------------------|-------------|
| 7.898                | 1.45             | 159.52            | 59.40         | 2035.316          | 49.40       |
| 11.531               | 1.30             | 109.03            | 40.60         | 2084.391          | 50.60       |
| Total                |                  |                   |               |                   | 100.00      |

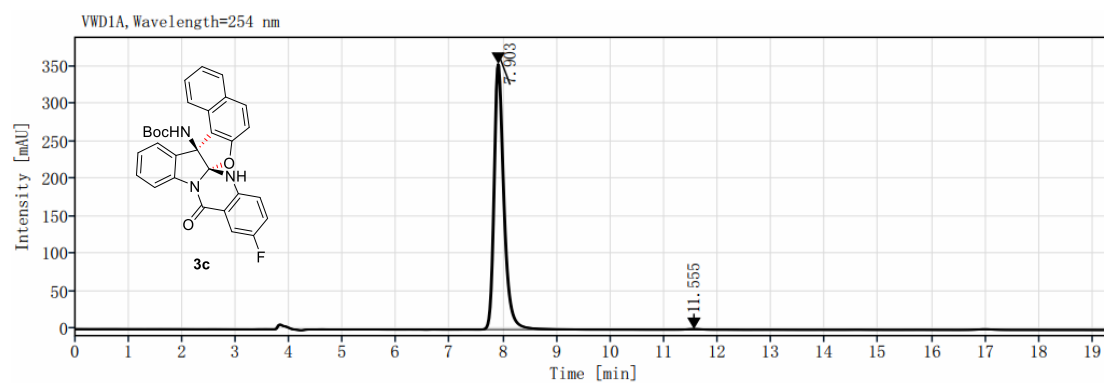

Signal: VWD1A, Wavelength=254 nm

| Retention Time [min] | Peak Width [min] | Peak Height [mAU] | Peak Height % | Peak Area [mAU*s] | Peak Area % |
|----------------------|------------------|-------------------|---------------|-------------------|-------------|
| 7.903                | 2.24             | 353.66            | 99.79         | 4526.588          | 99.65       |
| 11.555               | 1.46             | 0.76              | 0.21          | 15.944            | 0.35        |
| Total                |                  |                   |               |                   | 100.00      |

# HPLC spectra of 3d

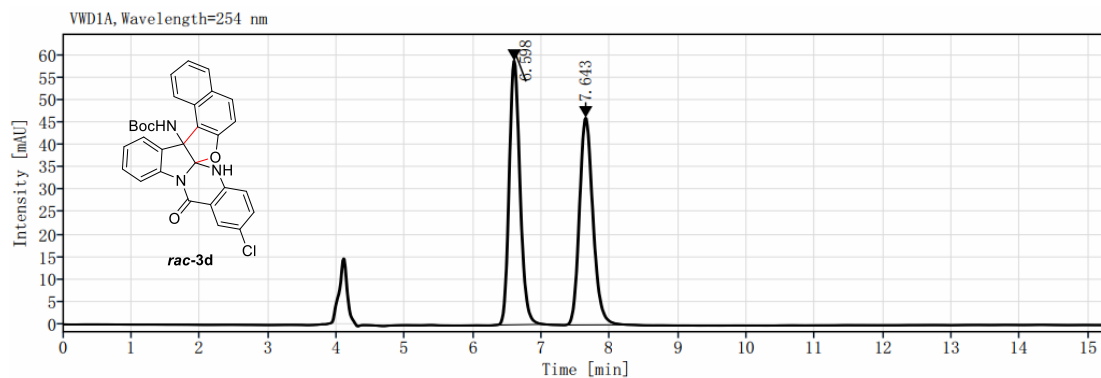

Signal:

VWD1A, Wavelength=254 nm

| Retention Time [min] | Peak Width [min] | Peak Height [mAU] | Peak Height % | Peak Area [mAU*s] | Peak Area % |
|----------------------|------------------|-------------------|---------------|-------------------|-------------|
| 6.598                | 0.74             | 58.97             | 56.01         | 649.141           | 50.50       |
| 7.643                | 0.99             | 46.32             | 43.99         | 636.166           | 49.50       |
| Total                |                  |                   |               |                   | 100.00      |

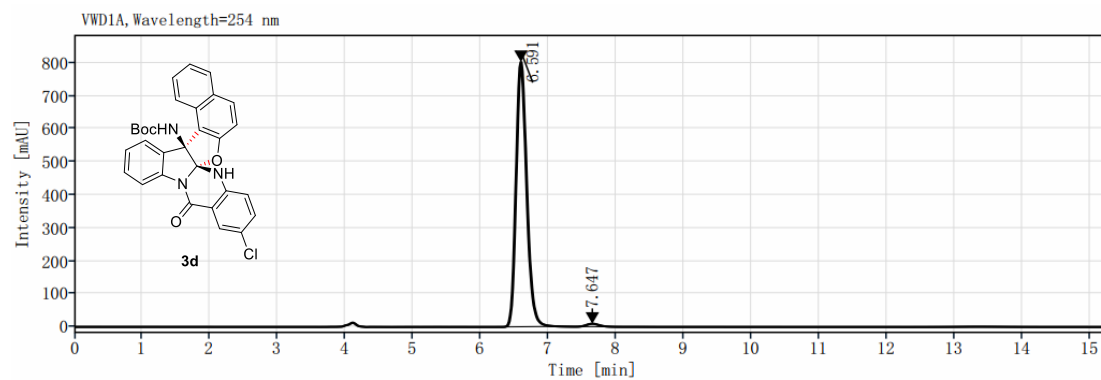

Signal:

VWD1A, Wavelength=254 nm

| Retention Time [min] | Peak Width [min] | Peak Height [mAU] | Peak Height % | Peak Area [mAU*s] | Peak Area % |
|----------------------|------------------|-------------------|---------------|-------------------|-------------|
| 6.591                | 0.85             | 803.32            | 98.91         | 8773.056          | 98.76       |
| 7.647                | 0.46             | 8.85              | 1.09          | 110.589           | 1.24        |
| Total                |                  |                   |               |                   | 100.00      |

# HPLC spectra of 3e

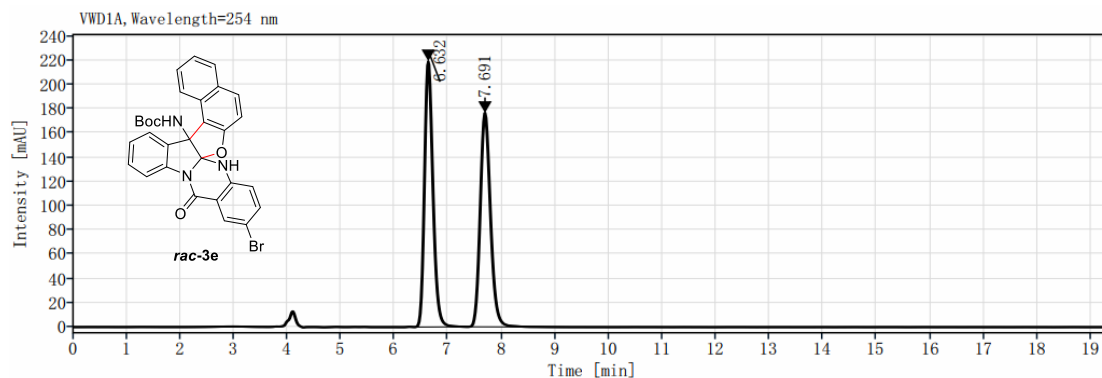

Signal:

VWD1A, Wavelength=254 nm

| Retention Time [min] | Peak Width [min] | Peak Height [mAU] | Peak Height % | Peak Area [mAU*s] | Peak Area % |
|----------------------|------------------|-------------------|---------------|-------------------|-------------|
| 6.632                | 0.99             | 219.69            | 55.41         | 2390.946          | 50.46       |
| 7.691                | 1.88             | 176.80            | 44.59         | 2347.398          | 49.54       |
| Total                |                  |                   |               |                   | 100.00      |

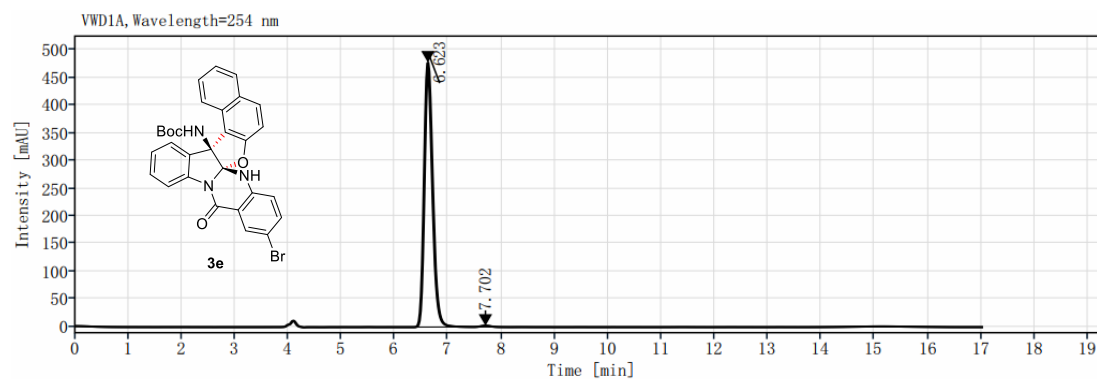

Signal:

VWD1A, Wavelength=254 nm

| Retention Time [min] | Peak Width [min] | Peak Height [mAU] | Peak Height % | Peak Area [mAU*s] | Peak Area % |
|----------------------|------------------|-------------------|---------------|-------------------|-------------|
| 6.623                | 1.13             | 477.72            | 99.51         | 5180.232          | 99.42       |
| 7.702                | 0.62             | 2.37              | 0.49          | 30.326            | 0.58        |
| Total                |                  |                   |               |                   | 100.00      |

# HPLC spectra of 3f

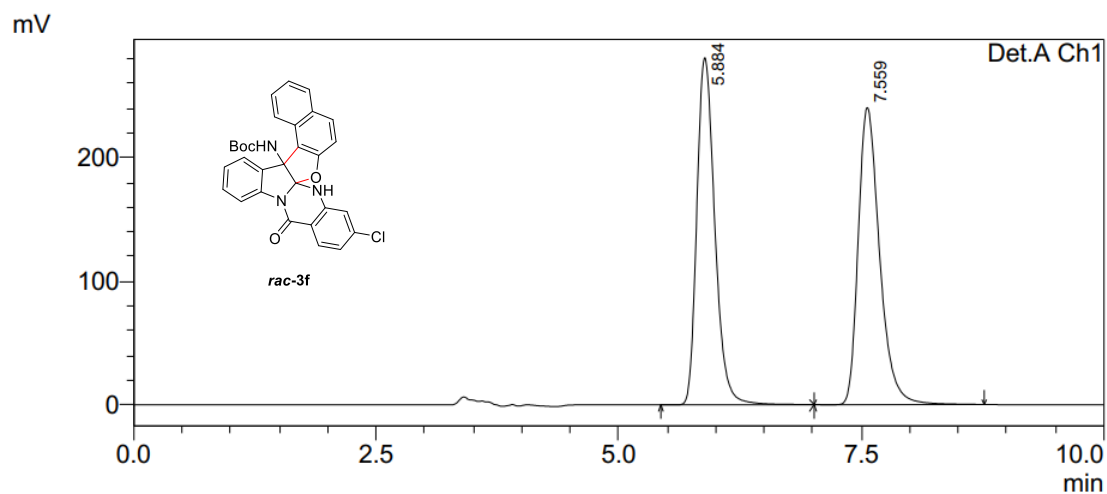

PeakTable

Detector A Ch1 254nm

| Peak# | Ret. Time | Area    | Height | Area %  |
|-------|-----------|---------|--------|---------|
| 1     | 5.884     | 3624580 | 280760 | 49.582  |
| 2     | 7.559     | 3685727 | 240274 | 50.418  |
| Total |           | 7310307 |        | 100.000 |

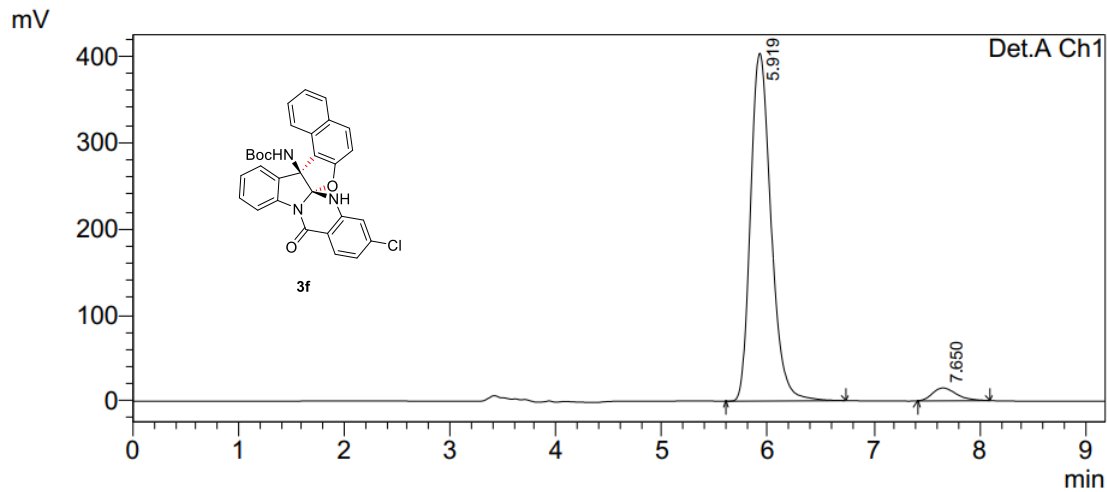

PeakTable

Detector A Ch1 254nm

| Peak# | Ret. Time | Area    | Height | Area %  |
|-------|-----------|---------|--------|---------|
| 1     | 5.919     | 5421911 | 403673 | 95.828  |
| 2     | 7.650     | 236025  | 14952  | 4.172   |
| Total |           | 5657935 |        | 100.000 |

# HPLC spectra of **3g**

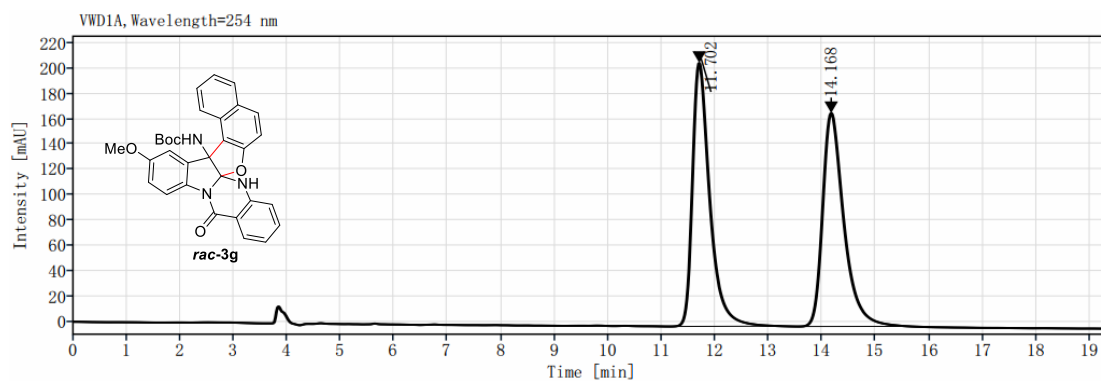

Signal:

VWD1A, Wavelength=254 nm

| Retention Time [min] | Peak Width [min] | Peak Height [mAU] | Peak Height % | Peak Area [mAU*s] | Peak Area % |
|----------------------|------------------|-------------------|---------------|-------------------|-------------|
| 11.702               | 2.10             | 208.31            | 55.25         | 4665.516          | 50.06       |
| 14.168               | 2.08             | 168.70            | 44.75         | 4654.047          | 49.94       |
| Total                |                  |                   |               |                   | 100.00      |

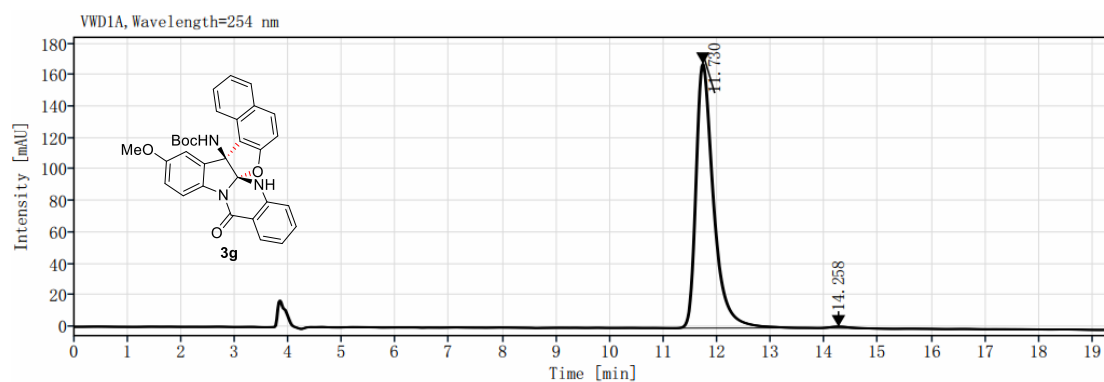

Signal:

VWD1A, Wavelength=254 nm

| Retention Time [min] | Peak Width [min] | Peak Height [mAU] | Peak Height % | Peak Area [mAU*s] | Peak Area % |
|----------------------|------------------|-------------------|---------------|-------------------|-------------|
| 11.730               | 2.54             | 168.33            | 99.42         | 3816.228          | 99.33       |
| 14.258               | 1.08             | 0.98              | 0.58          | 25.803            | 0.67        |
| Total                |                  |                   |               |                   | 100.00      |

# HPLC spectra of **3h**

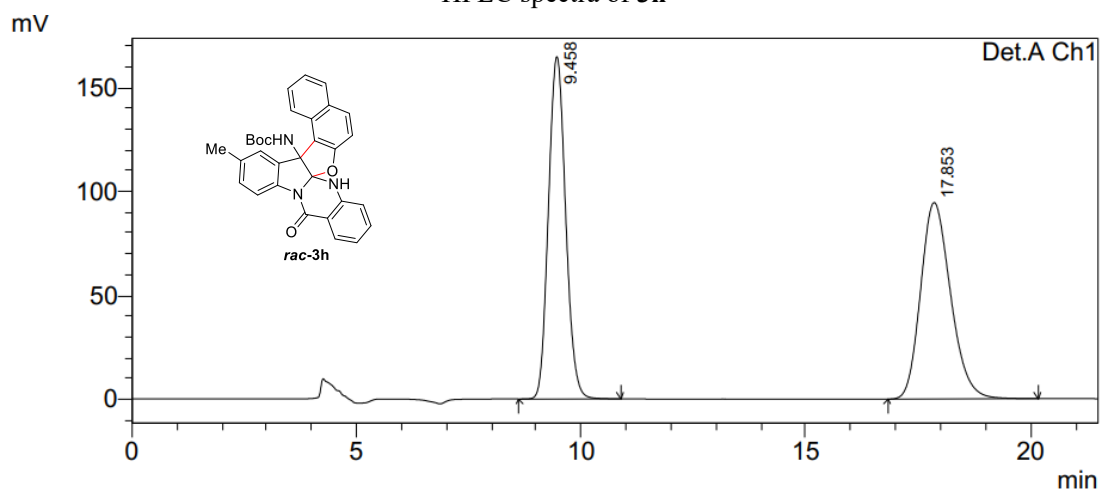

1 Det.A Ch1/254nm

PeakTable

Detector A Ch1 254nm

| Peak# | Ret. Time | Area    | Height | Area %  |
|-------|-----------|---------|--------|---------|
| 1     | 9.458     | 4394406 | 165082 | 49.972  |
| 2     | 17.853    | 4399341 | 94745  | 50.028  |
| Total |           | 8793747 |        | 100.000 |

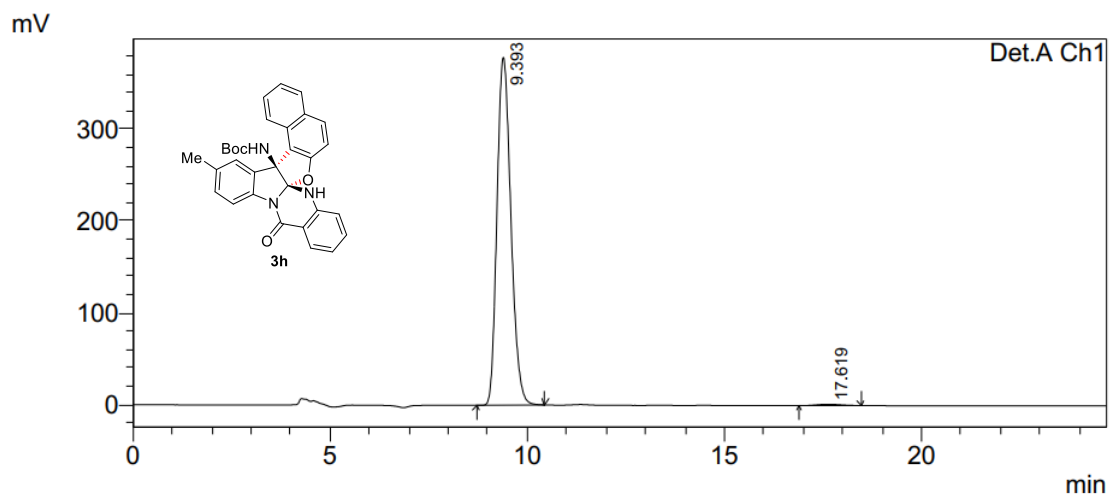

1 Det.A Ch1/254nm

PeakTable

Detector A Ch1 254nm

| Peak# | Ret. Time | Area    | Height | Area %  |
|-------|-----------|---------|--------|---------|
| 1     | 9.393     | 9292055 | 378594 | 99.347  |
| 2     | 17.619    | 61072   | 1442   | 0.653   |
| Total |           | 9353127 |        | 100.000 |

# HPLC spectra of 3i

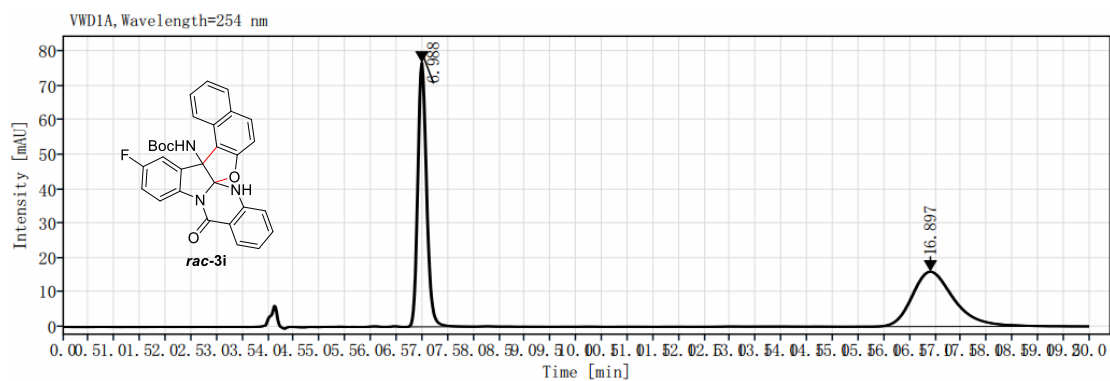

Signal:

VWD1A, Wavelength=254 nm

| Retention Time [min] | Peak Width [min] | Peak Height [mAU] | Peak Height % | Peak Area [mAU*s] | Peak Area % |
|----------------------|------------------|-------------------|---------------|-------------------|-------------|
| 6.988                | 1.37             | 76.76             | 82.80         | 918.153           | 50.32       |
| 16.897               | 4.12             | 15.95             | 17.20         | 906.329           | 49.68       |
| Total                |                  |                   |               |                   | 100.00      |

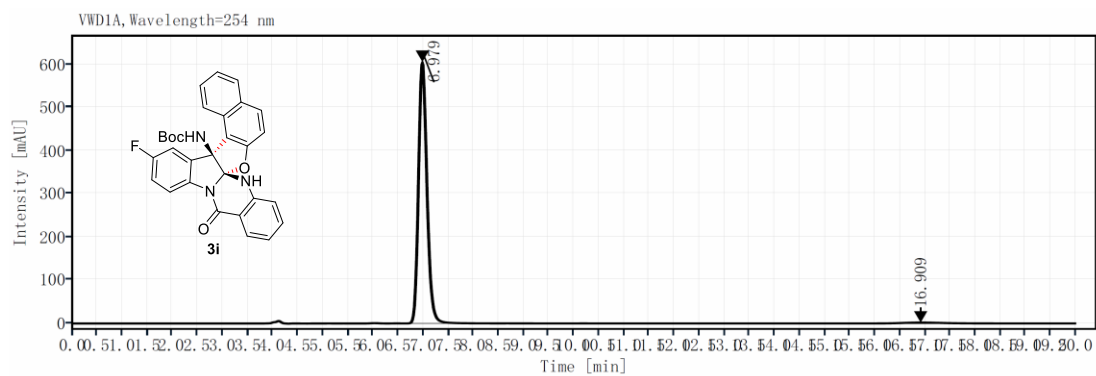

Signal:

VWD1A, Wavelength=254 nm

| Retention Time [min] | Peak Width [min] | Peak Height [mAU] | Peak Height % | Peak Area [mAU*s] | Peak Area % |
|----------------------|------------------|-------------------|---------------|-------------------|-------------|
| 6.979                | 1.88             | 605.47            | 99.67         | 7130.448          | 98.54       |
| 16.909               | 2.20             | 2.00              | 0.33          | 105.825           | 1.46        |
| Total                |                  |                   |               |                   | 100.00      |

# HPLC spectra of 3j

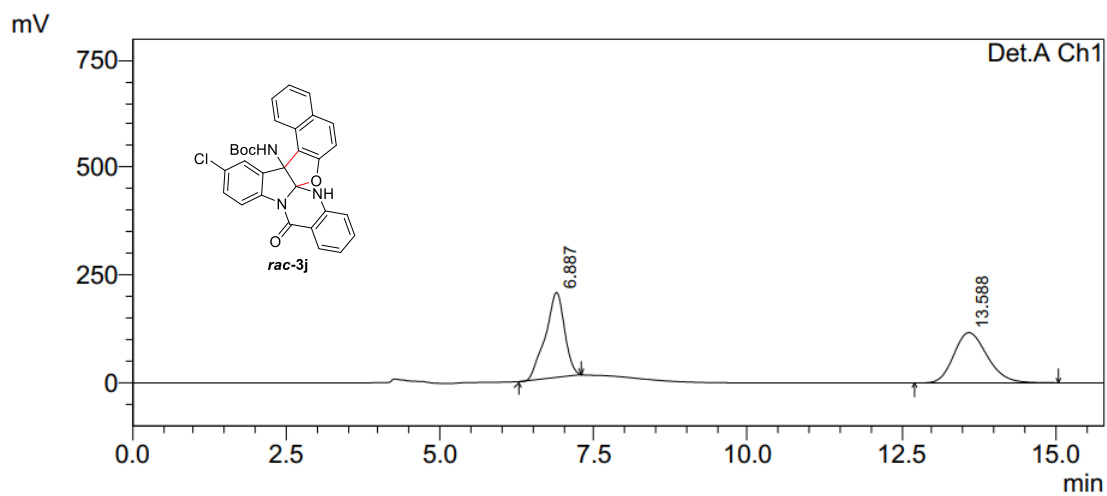

1 Det.A Ch1/254nm

PeakTable

Detector A Ch1 254nm

| Peak# | Ret. Time | Area    | Height | Area %  |
|-------|-----------|---------|--------|---------|
| 1     | 6.887     | 4256549 | 197091 | 49.091  |
| 2     | 13.588    | 4414180 | 116790 | 50.909  |
| Total |           | 8670729 |        | 100.000 |

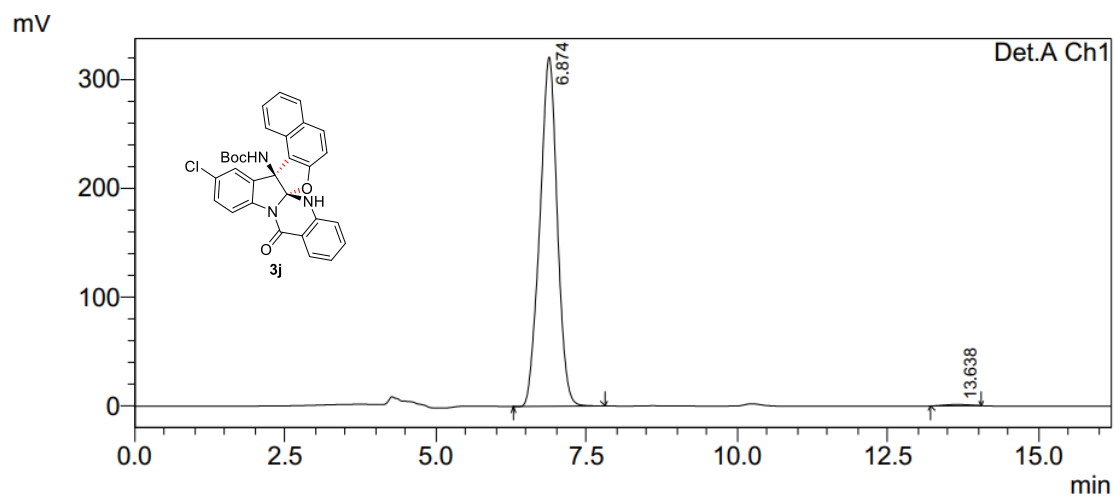

1 Det.A Ch1/254nm

PeakTable

Detector A Ch1 254nm

| Peak# | Ret. Time | Area    | Height | Area %  |
|-------|-----------|---------|--------|---------|
| 1     | 6.874     | 6445210 | 320000 | 99.461  |
| 2     | 13.638    | 34927   | 1242   | 0.539   |
| Total |           | 6480137 |        | 100.000 |

# HPLC spectra of 3k

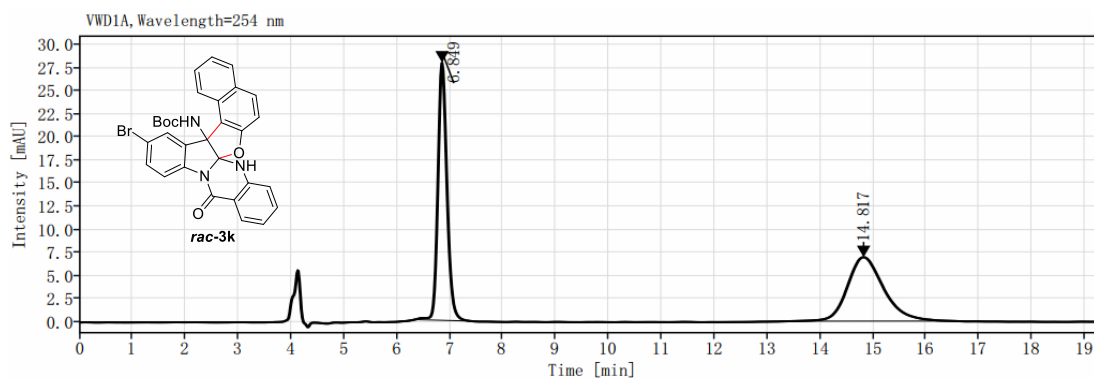

Signal:

VWD1A, Wavelength=254 nm

| Retention Time [min] | Peak Width [min] | Peak Height [mAU] | Peak Height % | Peak Area [mAU*s] | Peak Area % |
|----------------------|------------------|-------------------|---------------|-------------------|-------------|
| 6.849                | 1.05             | 27.86             | 80.13         | 331.311           | 50.18       |
| 14.817               | 3.07             | 6.91              | 19.87         | 328.961           | 49.82       |
| Total                |                  |                   |               |                   | 100.00      |

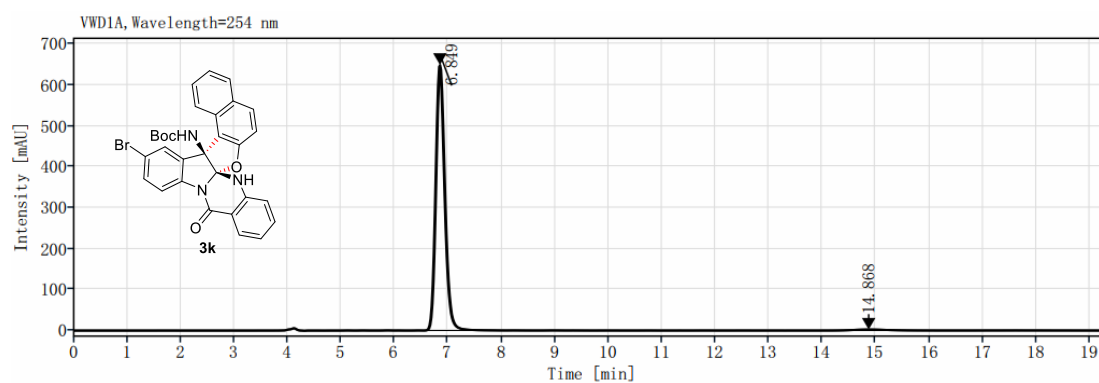

Signal:

VWD1A, Wavelength=254 nm

| Retention Time [min] | Peak Width [min] | Peak Height [mAU] | Peak Height % | Peak Area [mAU*s] | Peak Area % |
|----------------------|------------------|-------------------|---------------|-------------------|-------------|
| 6.849                | 1.35             | 650.06            | 99.62         | 7541.904          | 98.51       |
| 14.868               | 2.70             | 2.46              | 0.38          | 113.842           | 1.49        |
| Total                |                  |                   |               |                   | 100.00      |

# HPLC spectra of 3I

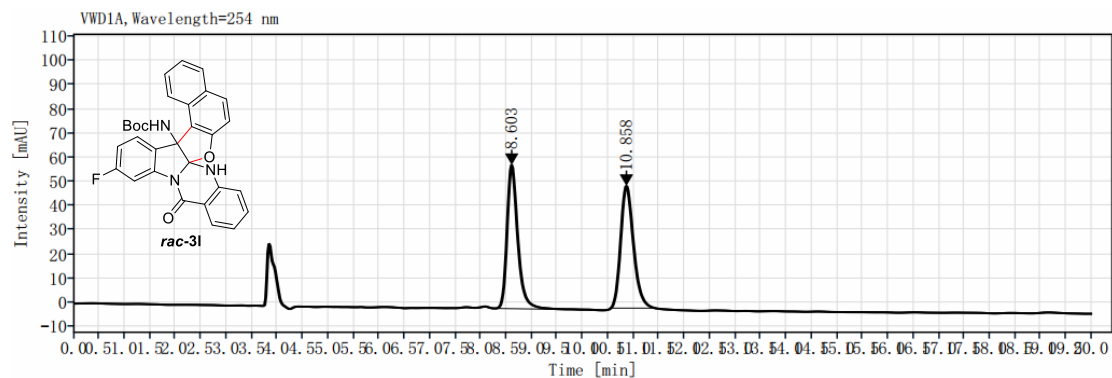

Signal:

VWD1A, Wavelength=254 nm

| Retention Time [min] | Peak Width [min] | Peak Height [mAU] | Peak Height % | Peak Area [mAU*s] | Peak Area % |
|----------------------|------------------|-------------------|---------------|-------------------|-------------|
| 8.603                | 1.94             | 59.41             | 54.04         | 875.192           | 49.69       |
| 10.858               | 0.87             | 50.53             | 45.96         | 885.975           | 50.31       |
| Total                |                  |                   |               |                   | 100.00      |

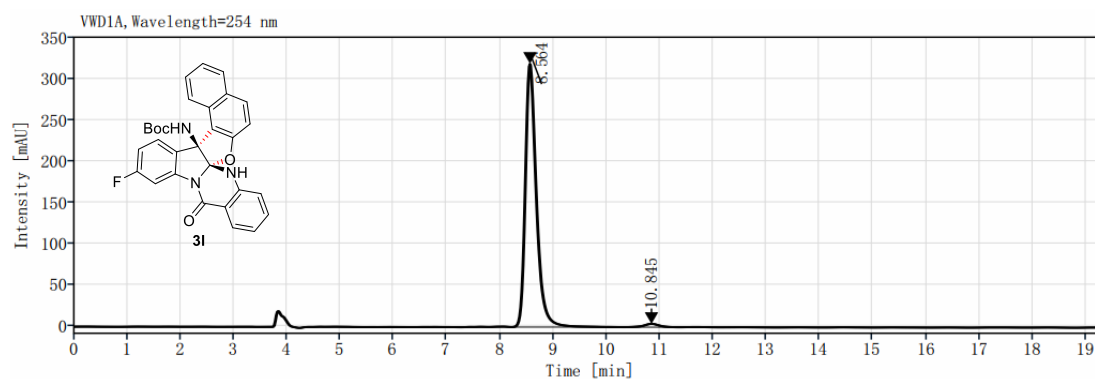

Signal:

VWD1A, Wavelength=254 nm

| Retention Time [min] | Peak Width [min] | Peak Height [mAU] | Peak Height % | Peak Area [mAU*s] | Peak Area % |
|----------------------|------------------|-------------------|---------------|-------------------|-------------|
| 8.564                | 1.97             | 319.76            | 98.74         | 4584.438          | 98.31       |
| 10.845               | 0.98             | 4.10              | 1.26          | 78.673            | 1.69        |
| Total                |                  |                   |               |                   | 100.00      |

# HPLC spectra of 3m

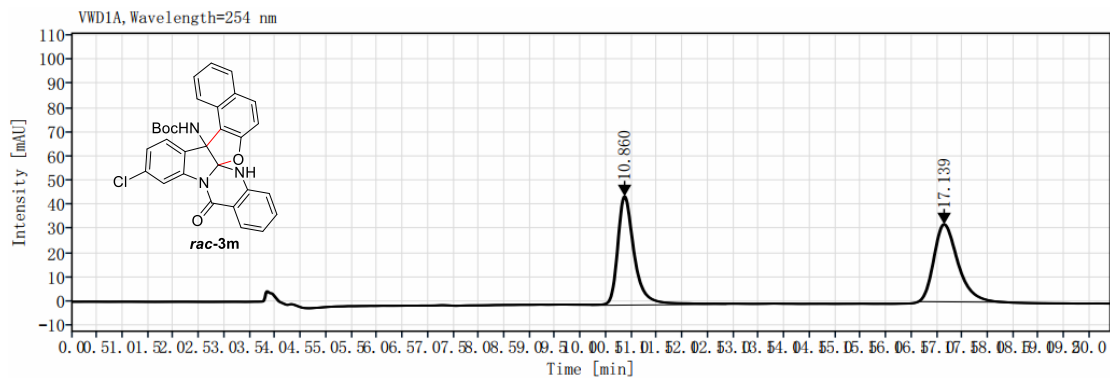

Signal:

VWD1A, Wavelength=254 nm

| Retention Time [min] | Peak Width [min] | Peak Height [mAU] | Peak Height % | Peak Area [mAU*s] | Peak Area % |
|----------------------|------------------|-------------------|---------------|-------------------|-------------|
| 10.860               | 2.66             | 45.00             | 58.40         | 1039.896          | 49.74       |
| 17.139               | 1.71             | 32.06             | 41.60         | 1050.678          | 50.26       |
| Total                |                  |                   |               |                   | 100.00      |

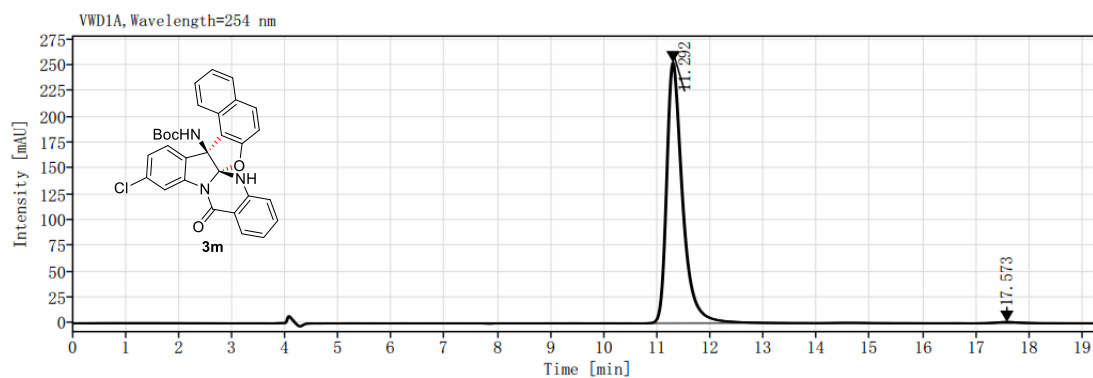

Signal:

VWD1A, Wavelength=254 nm

| Retention Time [min] | Peak Width [min] | Peak Height [mAU] | Peak Height % | Peak Area [mAU*s] | Peak Area % |
|----------------------|------------------|-------------------|---------------|-------------------|-------------|
| 11.292               | 2.96             | 252.85            | 99.51         | 5287.111          | 99.23       |
| 17.573               | 1.70             | 1.25              | 0.49          | 41.294            | 0.77        |
| Total                |                  |                   |               |                   | 100.00      |

# HPLC spectra of 3n

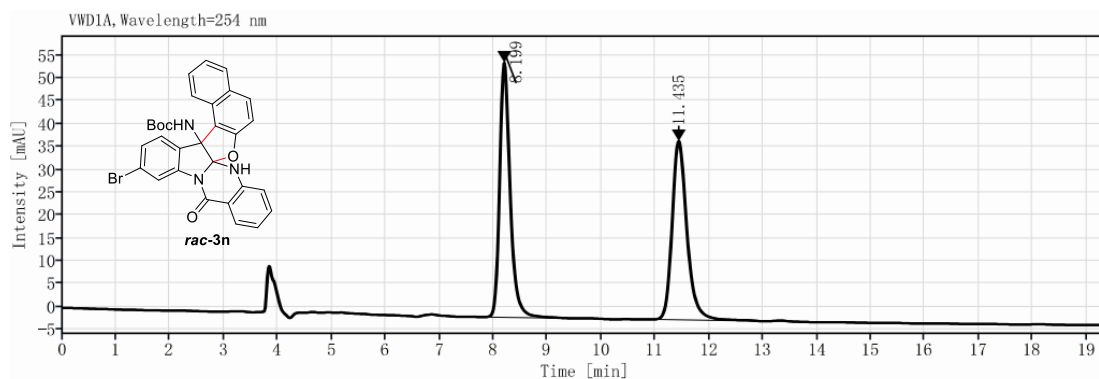

Signal:

VWD1A, Wavelength=254 nm

| Retention Time [min] | Peak Width [min] | Peak Height [mAU] | Peak Height % | Peak Area [mAU*s] | Peak Area % |
|----------------------|------------------|-------------------|---------------|-------------------|-------------|
| 8.199                | 1.67             | 55.70             | 58.75         | 757.974           | 50.04       |
| 11.435               | 2.09             | 39.10             | 41.25         | 756.784           | 49.96       |
| Total                |                  |                   |               |                   | 100.00      |

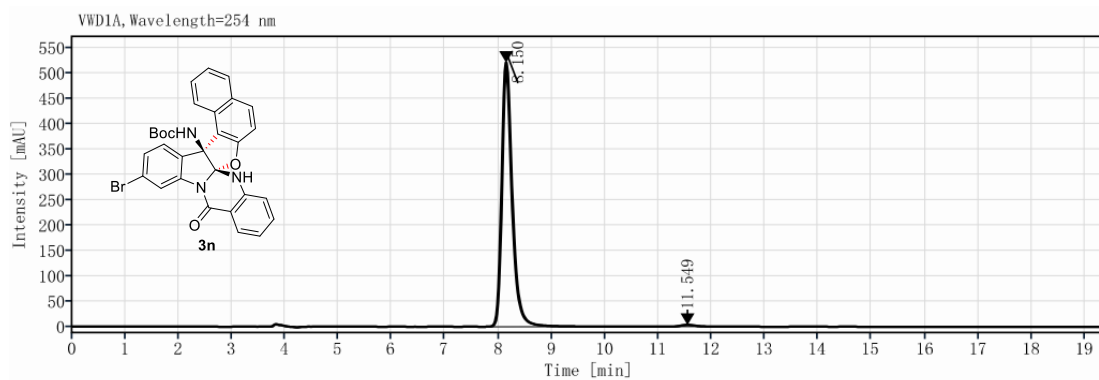

Signal:

VWD1A, Wavelength=254 nm

| Retention Time [min] | Peak Width [min] | Peak Height [mAU] | Peak Height % | Peak Area [mAU*s] | Peak Area % |
|----------------------|------------------|-------------------|---------------|-------------------|-------------|
| 8.150                | 2.88             | 521.83            | 99.32         | 7032.768          | 99.01       |
| 11.549               | 1.21             | 3.57              | 0.68          | 70.567            | 0.99        |
| Total                |                  |                   |               |                   | 100.00      |

# HPLC spectra of 3o

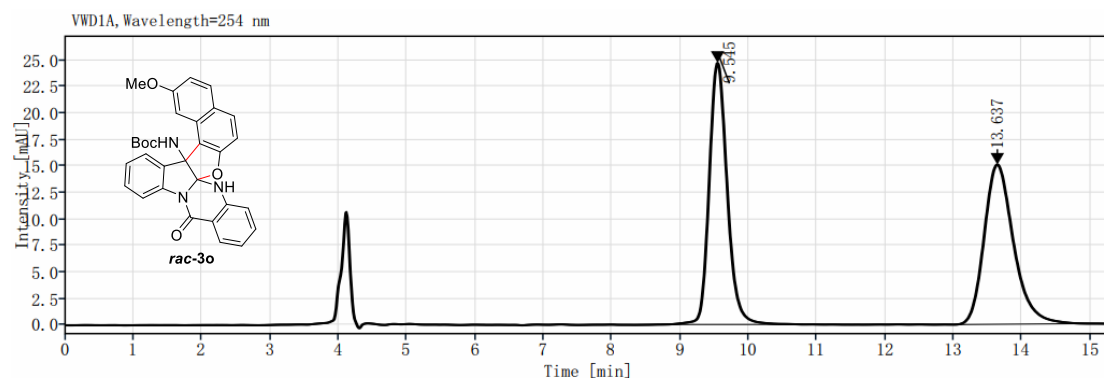

Signal:

VWD1A, Wavelength=254 nm

| Retention Time [min] | Peak Width [min] | Peak Height [mAU] | Peak Height % | Peak Area [mAU*s] | Peak Area % |
|----------------------|------------------|-------------------|---------------|-------------------|-------------|
| 9.545                | 2.07             | 24.70             | 62.10         | 452.713           | 50.11       |
| 13.637               | 1.97             | 15.07             | 37.90         | 450.780           | 49.89       |
| Total                |                  |                   |               |                   | 100.00      |

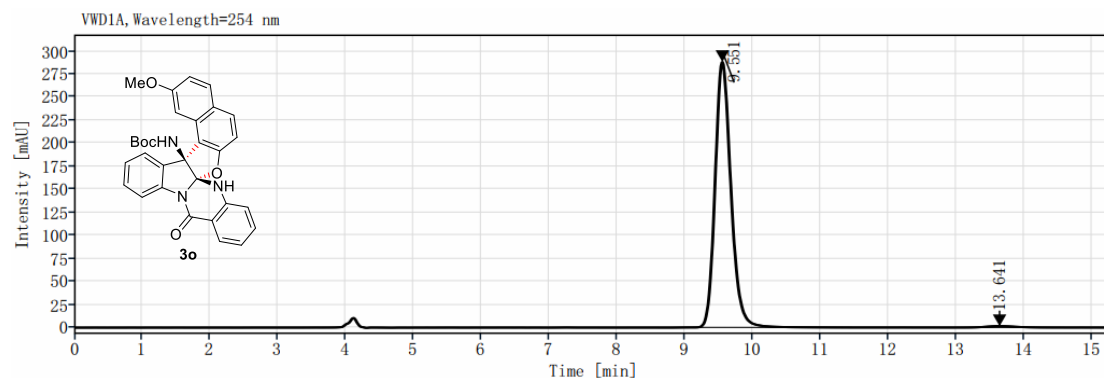

Signal:

VWD1A, Wavelength=254 nm

| Retention Time [min] | Peak Width [min] | Peak Height [mAU] | Peak Height % | Peak Area [mAU*s] | Peak Area % |
|----------------------|------------------|-------------------|---------------|-------------------|-------------|
| 9.551                | 2.35             | 288.31            | 99.45         | 4696.758          | 99.03       |
| 13.641               | 1.47             | 1.59              | 0.55          | 46.111            | 0.97        |
| Total                |                  |                   |               |                   | 100.00      |

# HPLC spectra of **3p**

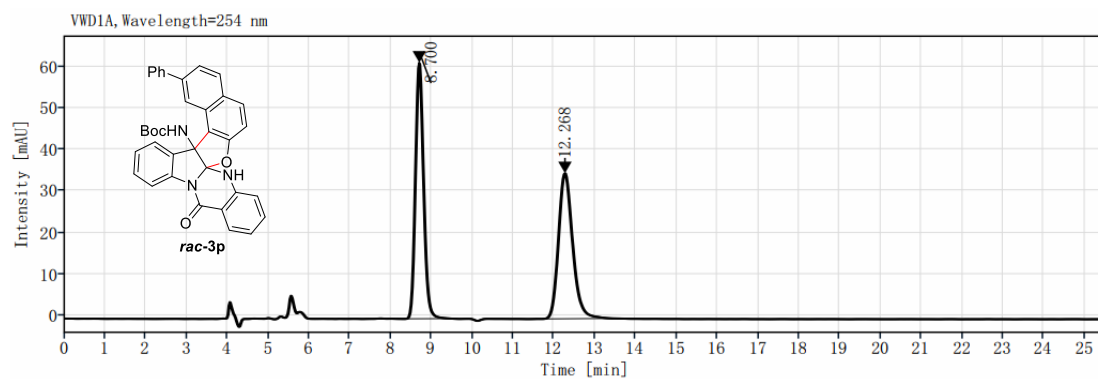

Signal: VWD1A, Wavelength=254 nm

| Retention Time [min] | Peak Width [min] | Peak Height [mAU] | Peak Height % | Peak Area [mAU*s] | Peak Area % |
|----------------------|------------------|-------------------|---------------|-------------------|-------------|
| 8.700                | 1.34             | 62.05             | 63.76         | 860.062           | 50.28       |
| 12.268               | 1.74             | 35.27             | 36.24         | 850.611           | 49.72       |
| Total                |                  |                   |               |                   | 100.00      |

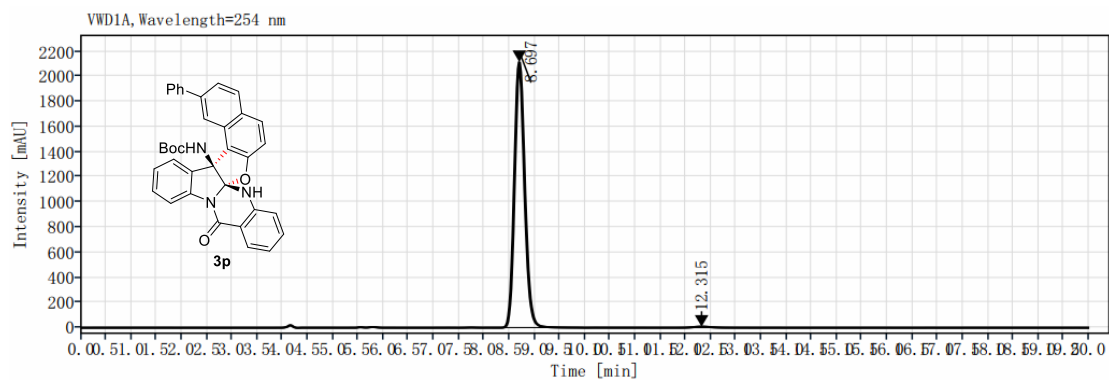

Signal: VWD1A, Wavelength=254 nm

| Retention Time [min] | Peak Width [min] | Peak Height [mAU] | Peak Height % | Peak Area [mAU*s] | Peak Area % |
|----------------------|------------------|-------------------|---------------|-------------------|-------------|
| 8.697                | 1.48             | 2116.07           | 99.61         | 29898.653         | 99.35       |
| 12.315               | 1.00             | 8.20              | 0.39          | 194.613           | 0.65        |
| Total                |                  |                   |               |                   | 100.00      |

# HPLC spectra of **3q**

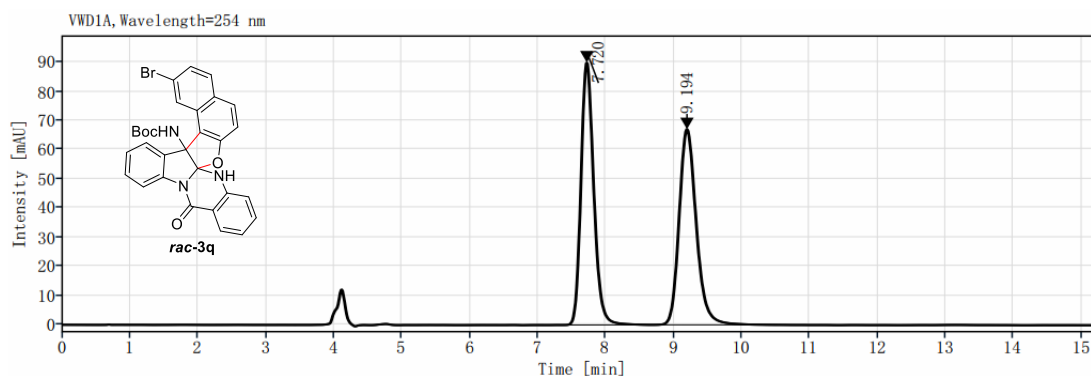

Signal:

VWD1A, Wavelength=254 nm

| Retention Time [min] | Peak Width [min] | Peak Height [mAU] | Peak Height % | Peak Area [mAU*s] | Peak Area % |
|----------------------|------------------|-------------------|---------------|-------------------|-------------|
| 7.720                | 1.31             | 89.98             | 57.29         | 1173.515          | 49.92       |
| 9.194                | 1.84             | 67.09             | 42.71         | 1177.170          | 50.08       |
| Total                |                  |                   |               |                   | 100.00      |

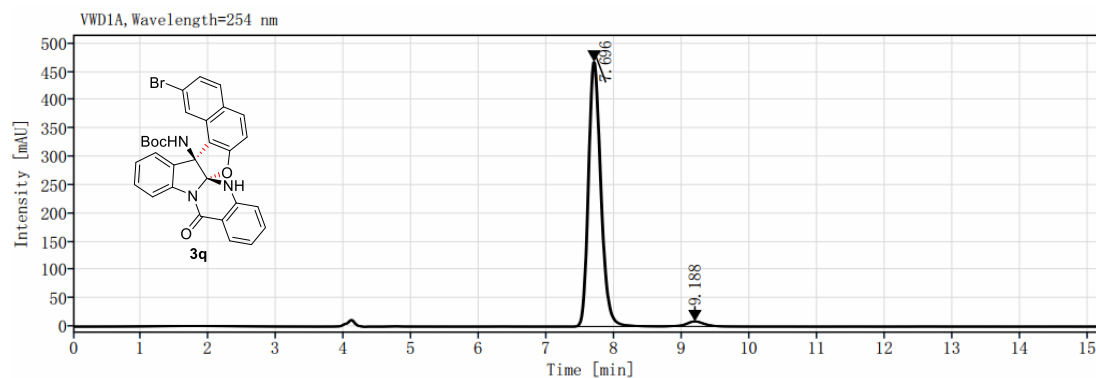

Signal:

VWD1A, Wavelength=254 nm

| Retention Time [min] | Peak Width [min] | Peak Height [mAU] | Peak Height % | Peak Area [mAU*s] | Peak Area % |
|----------------------|------------------|-------------------|---------------|-------------------|-------------|
| 7.696                | 1.32             | 467.57            | 98.13         | 5970.789          | 97.28       |
| 9.188                | 1.29             | 8.92              | 1.87          | 166.979           | 2.72        |
| Total                |                  |                   |               |                   | 100.00      |

# HPLC spectra of **3r**

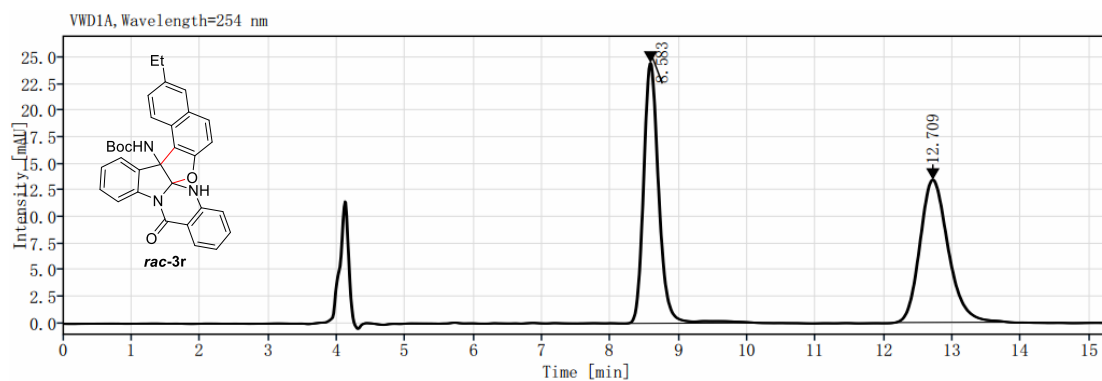

Signal: VWD1A, Wavelength=254 nm

| Retention Time [min] | Peak Width [min] | Peak Height [mAU] | Peak Height % | Peak Area [mAU*s] | Peak Area % |
|----------------------|------------------|-------------------|---------------|-------------------|-------------|
| 8.583                | 1.96             | 24.51             | 64.63         | 379.270           | 49.61       |
| 12.709               | 1.65             | 13.41             | 35.37         | 385.158           | 50.39       |
| Total                |                  |                   |               |                   | 100.00      |

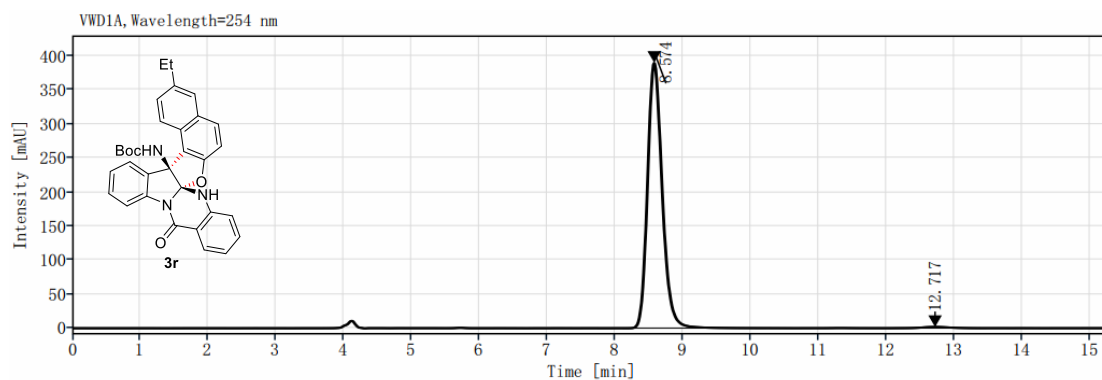

Signal: VWD1A, Wavelength=254 nm

| Retention Time [min] | Peak Width [min] | Peak Height [mAU] | Peak Height % | Peak Area [mAU*s] | Peak Area % |
|----------------------|------------------|-------------------|---------------|-------------------|-------------|
| 8.574                | 2.10             | 390.16            | 99.53         | 5869.822          | 99.12       |
| 12.717               | 1.44             | 1.84              | 0.47          | 52.275            | 0.88        |
| Total                |                  |                   |               |                   | 100.00      |

# HPLC spectra of 3s

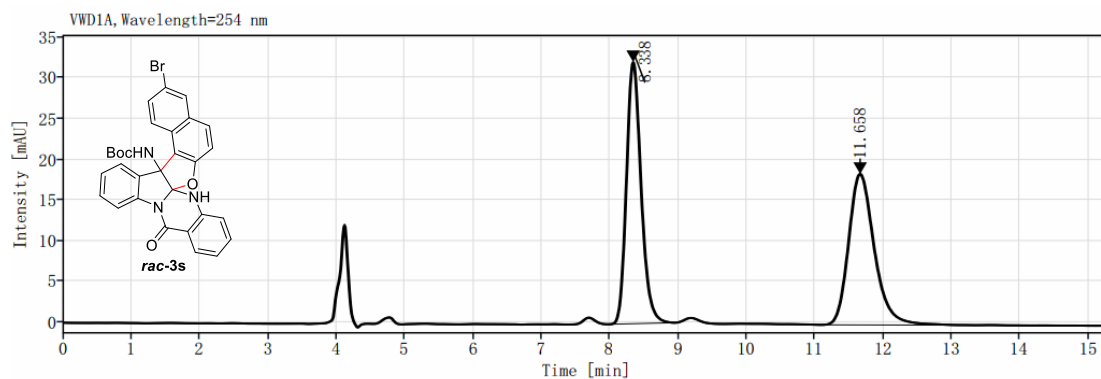

Signal: VWD1A, Wavelength=254 nm

| Retention Time [min] | Peak Width [min] | Peak Height [mAU] | Peak Height % | Peak Area [mAU*s] | Peak Area % |
|----------------------|------------------|-------------------|---------------|-------------------|-------------|
| 8.338                | 0.95             | 32.15             | 63.41         | 478.337           | 49.65       |
| 11.658               | 2.28             | 18.55             | 36.59         | 485.102           | 50.35       |
| Total                |                  |                   |               |                   | 100.00      |

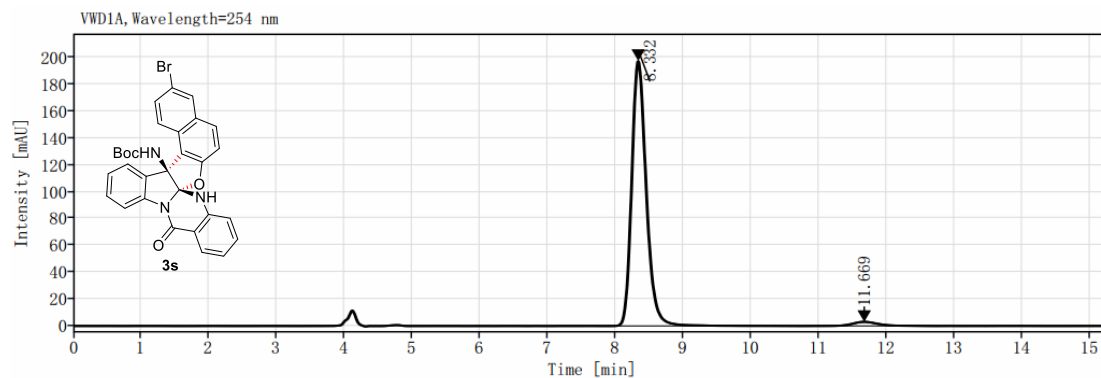

Signal: VWD1A, Wavelength=254 nm

| Retention Time [min] | Peak Width [min] | Peak Height [mAU] | Peak Height % | Peak Area [mAU*s] | Peak Area % |
|----------------------|------------------|-------------------|---------------|-------------------|-------------|
| 8.332                | 2.19             | 197.93            | 98.49         | 2955.499          | 97.33       |
| 11.669               | 1.67             | 3.04              | 1.51          | 81.077            | 2.67        |
| Total                |                  |                   |               |                   | 100.00      |

# HPLC spectra of 3t

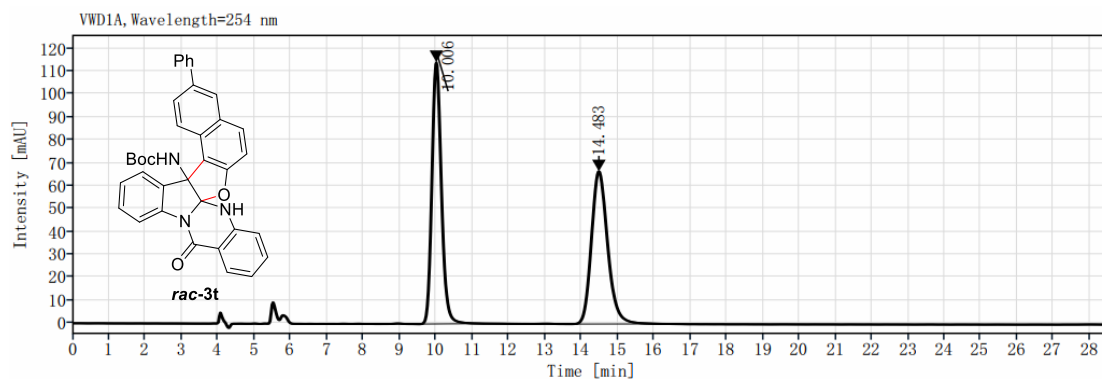

Signal: VWD1A, Wavelength=254 nm

| Retention Time [min] | Peak Width [min] | Peak Height [mAU] | Peak Height % | Peak Area [mAU*s] | Peak Area % |
|----------------------|------------------|-------------------|---------------|-------------------|-------------|
| 10.006               | 1.92             | 114.40            | 63.16         | 2080.408          | 50.10       |
| 14.483               | 2.65             | 66.71             | 36.84         | 2072.333          | 49.90       |
| Total                |                  |                   |               |                   | 100.00      |

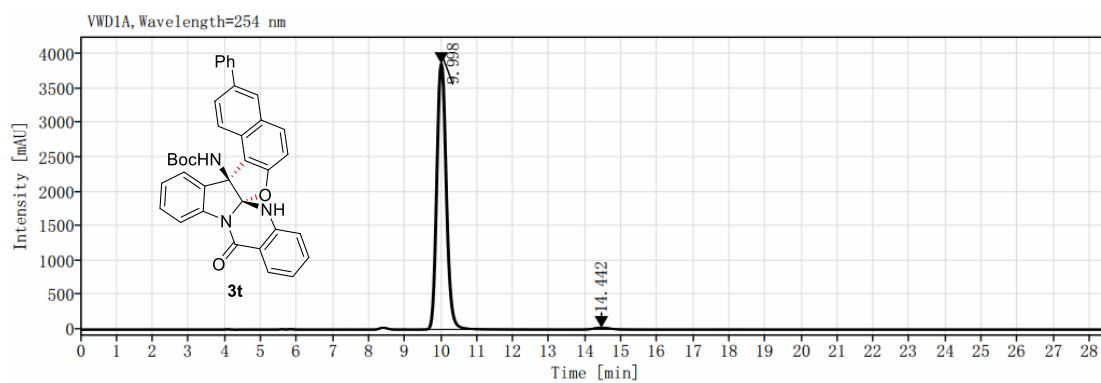

Signal: VWD1A, Wavelength=254 nm

| Retention Time [min] | Peak Width [min] | Peak Height [mAU] | Peak Height % | Peak Area [mAU*s] | Peak Area % |
|----------------------|------------------|-------------------|---------------|-------------------|-------------|
| 9.998                | 2.31             | 3854.47           | 99.36         | 70680.182         | 99.06       |
| 14.442               | 1.00             | 24.78             | 0.64          | 673.022           | 0.94        |
| Total                |                  |                   |               |                   | 100.00      |

# HPLC spectra of **3u**

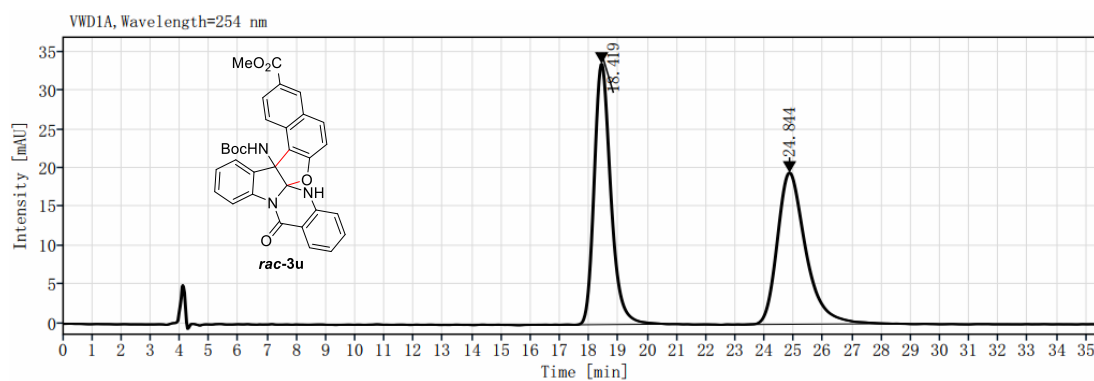

Signal: VWD1A, Wavelength=254 nm

| Retention Time [min] | Peak Width [min] | Peak Height [mAU] | Peak Height % | Peak Area [mAU*s] | Peak Area % |
|----------------------|------------------|-------------------|---------------|-------------------|-------------|
| 18.419               | 3.23             | 33.60             | 63.24         | 1327.682          | 50.16       |
| 24.844               | 5.10             | 19.53             | 36.76         | 1319.102          | 49.84       |
| Total                |                  |                   |               |                   | 100.00      |

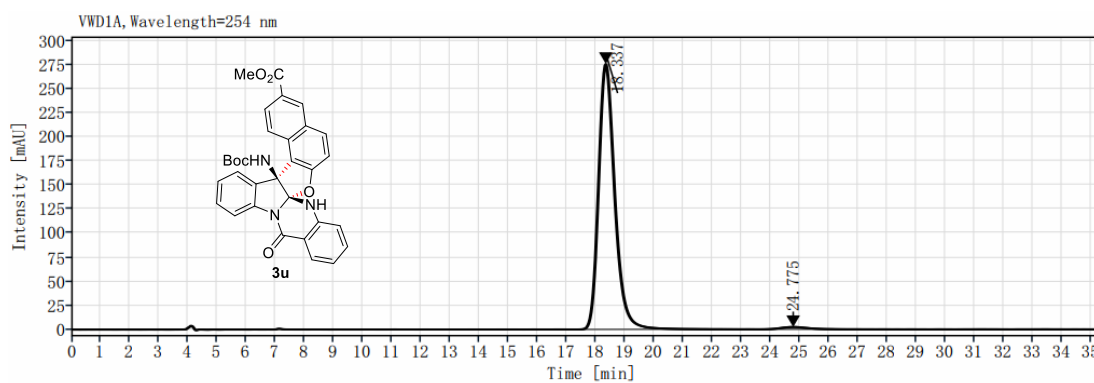

Signal: VWD1A, Wavelength=254 nm

| Retention Time [min] | Peak Width [min] | Peak Height [mAU] | Peak Height % | Peak Area [mAU*s] | Peak Area % |
|----------------------|------------------|-------------------|---------------|-------------------|-------------|
| 18.337               | 4.78             | 276.38            | 99.14         | 10678.175         | 98.57       |
| 24.775               | 3.01             | 2.39              | 0.86          | 155.390           | 1.43        |
| Total                |                  |                   |               |                   | 100.00      |

# HPLC spectra of **3w**

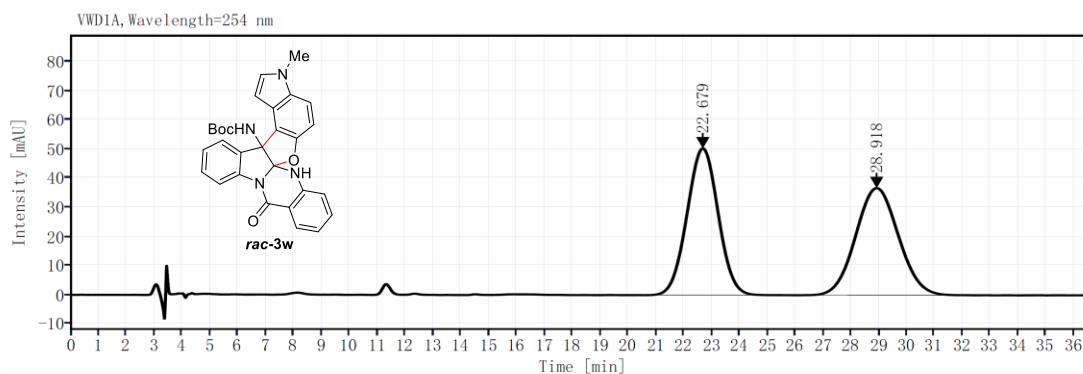

Signal:

VWD1A, Wavelength=254 nm

| Retention Time [min] | Peak Width [min] | Peak Height [mAU] | Peak Height % | Peak Area [mAU*s] | Peak Area % |
|----------------------|------------------|-------------------|---------------|-------------------|-------------|
| 22.679               | 5.71             | 50.40             | 57.80         | 3915.375          | 49.95       |
| 28.918               | 8.69             | 36.79             | 42.20         | 3923.964          | 50.05       |
|                      |                  |                   |               | Total             | 100.00      |

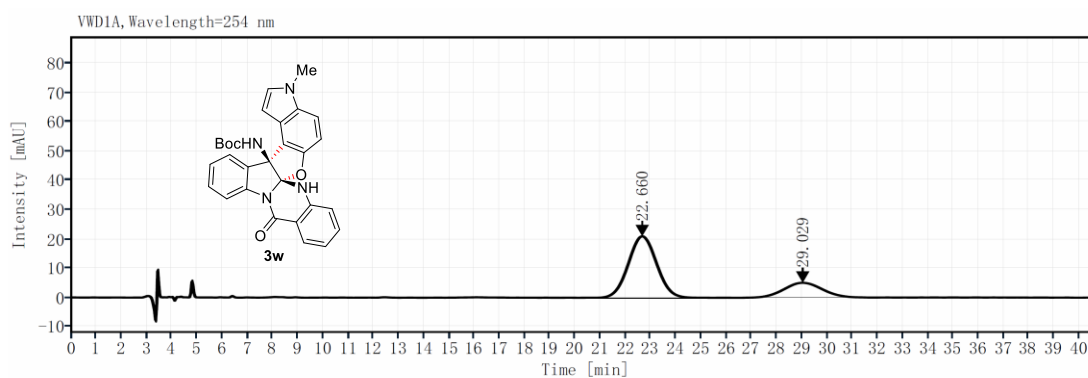

Signal:

VWD1A, Wavelength=254 nm

| Retention Time [min] | Peak Width [min] | Peak Height [mAU] | Peak Height % | Peak Area [mAU*s] | Peak Area % |
|----------------------|------------------|-------------------|---------------|-------------------|-------------|
| 22.660               | 5.83             | 21.16             | 81.06         | 1689.366          | 76.77       |
| 29.029               | 3.90             | 4.94              | 18.94         | 511.100           | 23.23       |
|                      |                  |                   |               | Total             | 100.00      |

## HPLC spectra of **5a**

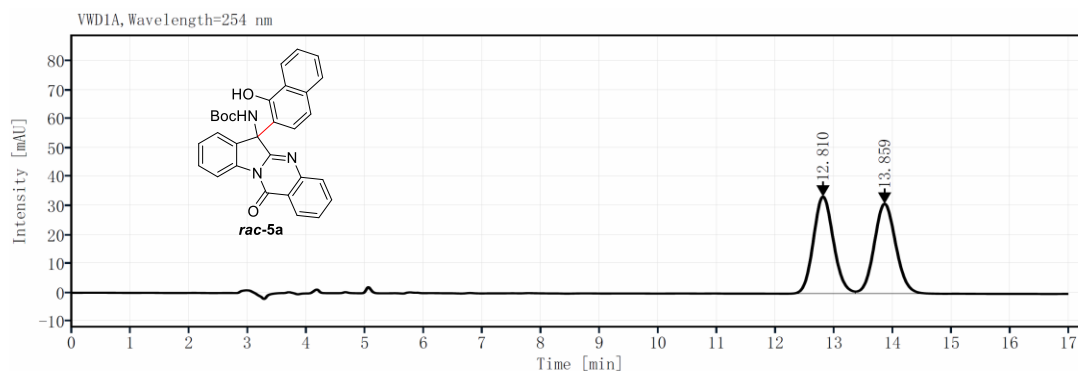

Signal: VWD1A, Wavelength=254 nm

| Retention Time [min] | Peak Width [min] | Peak Height [mAU] | Peak Height % | Peak Area [mAU*s] | Peak Area % |
|----------------------|------------------|-------------------|---------------|-------------------|-------------|
| 12.810               | 1.19             | 33.59             | 51.91         | 798.553           | 50.05       |
| 13.859               | 1.42             | 31.12             | 48.09         | 797.076           | 49.95       |
| Total                |                  |                   |               |                   | 100.00      |

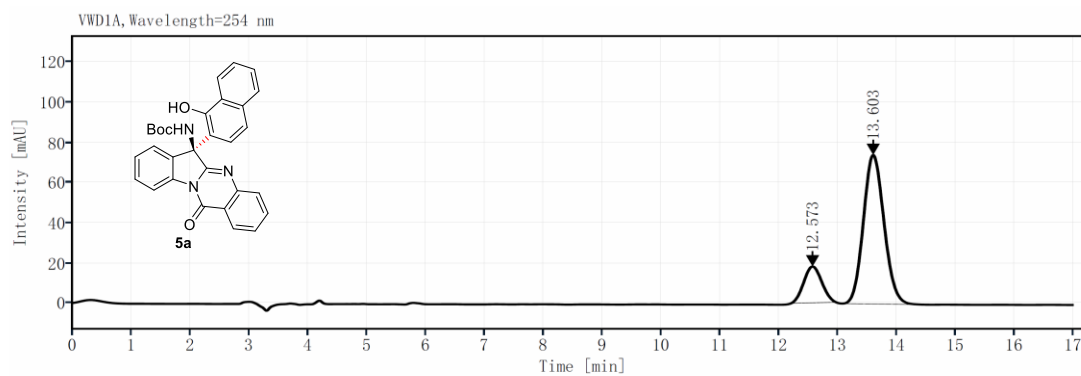

Signal: VWD1A, Wavelength=254 nm

| Retention Time [min] | Peak Width [min] | Peak Height [mAU] | Peak Height % | Peak Area [mAU*s] | Peak Area % |
|----------------------|------------------|-------------------|---------------|-------------------|-------------|
| 12.573               | 0.77             | 18.07             | 19.61         | 384.224           | 17.54       |
| 13.603               | 1.44             | 74.08             | 80.39         | 1806.879          | 82.46       |
| Total                |                  |                   |               |                   | 100.00      |

## HPLC spectra of **5b**

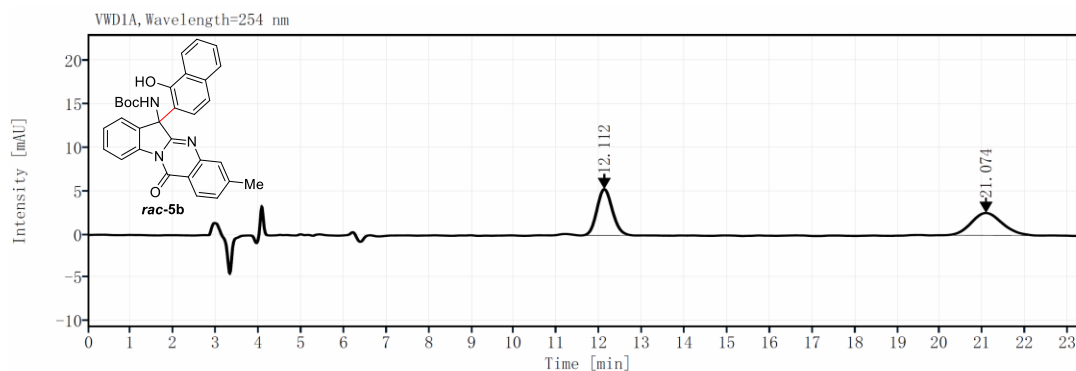

Signal: VWD1A, Wavelength=254 nm

| Retention Time [min] | Peak Width [min] | Peak Height [mAU] | Peak Height % | Peak Area [mAU*s] | Peak Area % |
|----------------------|------------------|-------------------|---------------|-------------------|-------------|
| 12.112               | 1.38             | 5.34              | 67.40         | 135.181           | 50.72       |
| 21.074               | 2.34             | 2.58              | 32.60         | 131.341           | 49.28       |
| Total                |                  |                   |               |                   | 100.00      |

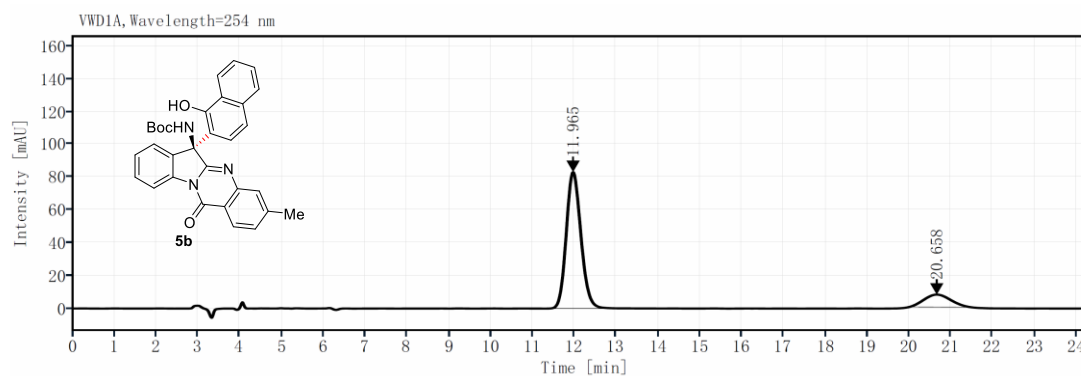

Signal: VWD1A, Wavelength=254 nm

| Retention Time [min] | Peak Width [min] | Peak Height [mAU] | Peak Height % | Peak Area [mAU*s] | Peak Area % |
|----------------------|------------------|-------------------|---------------|-------------------|-------------|
| 11.965               | 2.98             | 83.24             | 91.64         | 2028.346          | 85.84       |
| 20.658               | 1.47             | 7.59              | 8.36          | 334.613           | 14.16       |
| Total                |                  |                   |               |                   | 100.00      |

## HPLC spectra of **5c**

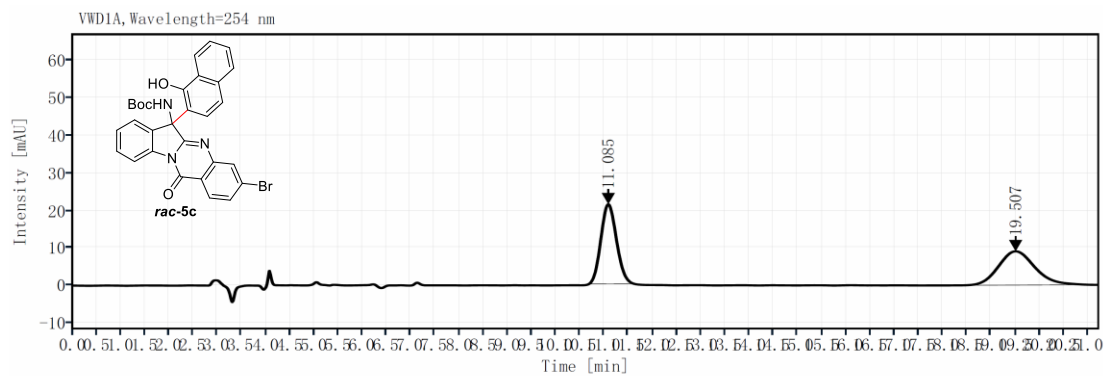

Signal: VWD1A, Wavelength=254 nm

| Retention Time [min] | Peak Width [min] | Peak Height [mAU] | Peak Height % | Peak Area [mAU*s] | Peak Area % |
|----------------------|------------------|-------------------|---------------|-------------------|-------------|
| 11.085               | 0.93             | 21.21             | 70.20         | 474.952           | 50.20       |
| 19.507               | 2.73             | 9.00              | 29.80         | 471.131           | 49.80       |
| Total                |                  |                   |               |                   | 100.00      |

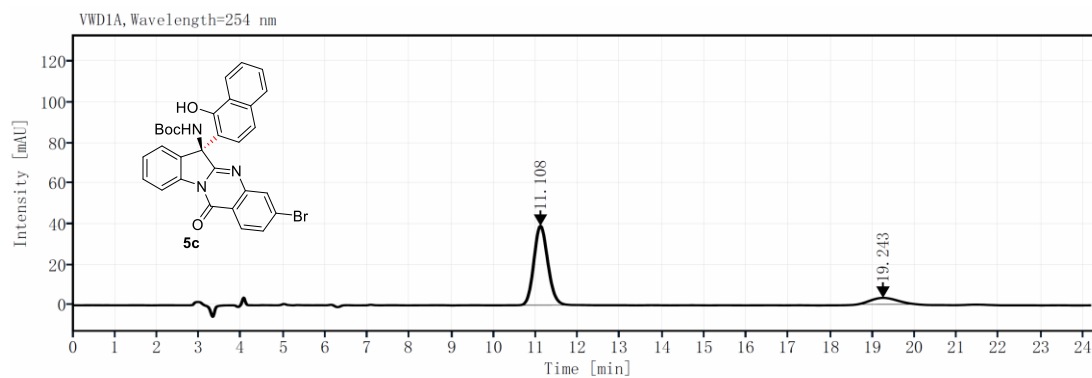

Signal: VWD1A, Wavelength=254 nm

| Retention Time [min] | Peak Width [min] | Peak Height [mAU] | Peak Height % | Peak Area [mAU*s] | Peak Area % |
|----------------------|------------------|-------------------|---------------|-------------------|-------------|
| 11.108               | 2.21             | 39.16             | 92.42         | 909.574           | 86.40       |
| 19.243               | 1.44             | 3.21              | 7.58          | 143.168           | 13.60       |
| Total                |                  |                   |               |                   | 100.00      |

## HPLC spectra of **5d**

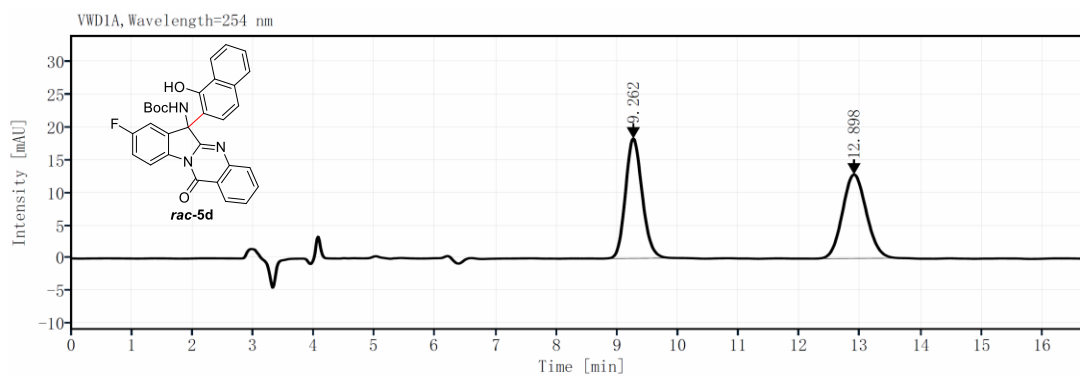

Signal: VWD1A, Wavelength=254 nm

| Retention Time [min] | Peak Width [min] | Peak Height [mAU] | Peak Height % | Peak Area [mAU*s] | Peak Area % |
|----------------------|------------------|-------------------|---------------|-------------------|-------------|
| 9.262                | 1.31             | 18.33             | 58.81         | 351.849           | 50.06       |
| 12.898               | 1.58             | 12.83             | 41.19         | 351.058           | 49.94       |
| Total                |                  |                   |               |                   | 100.00      |

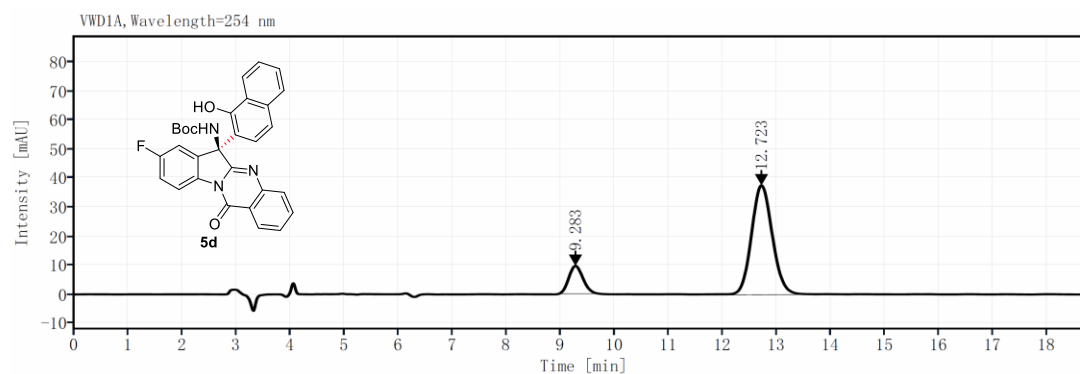

Signal: VWD1A, Wavelength=254 nm

| Retention Time [min] | Peak Width [min] | Peak Height [mAU] | Peak Height % | Peak Area [mAU*s] | Peak Area % |
|----------------------|------------------|-------------------|---------------|-------------------|-------------|
| 9.283                | 0.72             | 9.57              | 20.21         | 173.306           | 14.49       |
| 12.723               | 2.44             | 37.76             | 79.79         | 1022.686          | 85.51       |
| Total                |                  |                   |               |                   | 100.00      |

# HPLC spectra of 5e

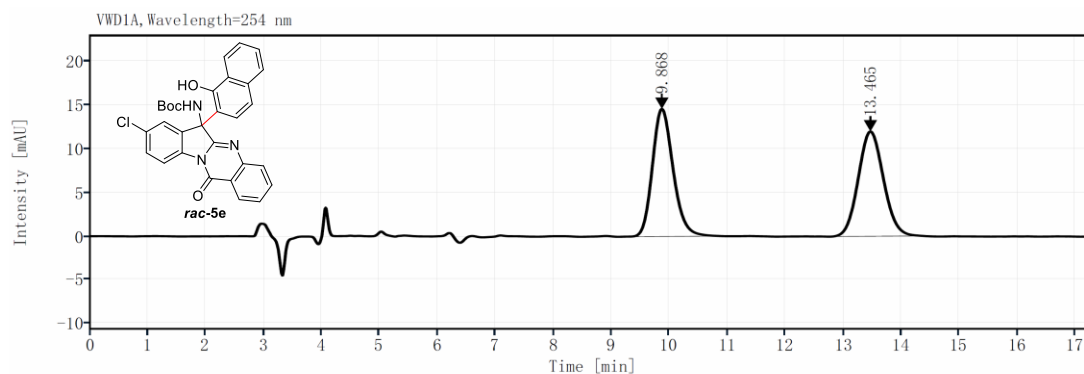

Signal:

VWD1A, Wavelength=254 nm

| Retention Time [min] | Peak Width [min] | Peak Height [mAU] | Peak Height % | Peak Area [mAU*s] | Peak Area % |
|----------------------|------------------|-------------------|---------------|-------------------|-------------|
| 9.868                | 1.68             | 14.61             | 54.91         | 363.933           | 50.08       |
| 13.465               | 1.74             | 12.00             | 45.09         | 362.706           | 49.92       |
| Total                |                  |                   |               |                   | 100.00      |

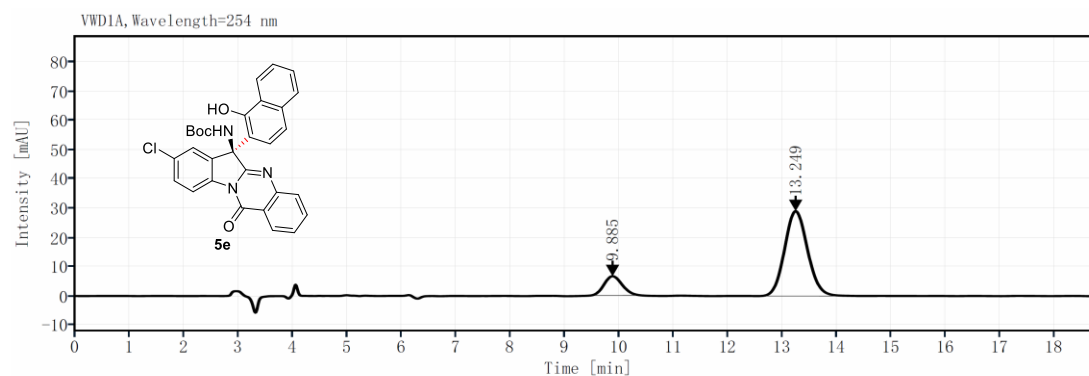

Signal:

VWD1A, Wavelength=254 nm

| Retention Time [min] | Peak Width [min] | Peak Height [mAU] | Peak Height % | Peak Area [mAU*s] | Peak Area % |
|----------------------|------------------|-------------------|---------------|-------------------|-------------|
| 9.885                | 0.90             | 6.55              | 18.40         | 150.639           | 15.01       |
| 13.249               | 2.08             | 29.06             | 81.60         | 853.164           | 84.99       |
| Total                |                  |                   |               |                   | 100.00      |

# HPLC spectra of **5f**

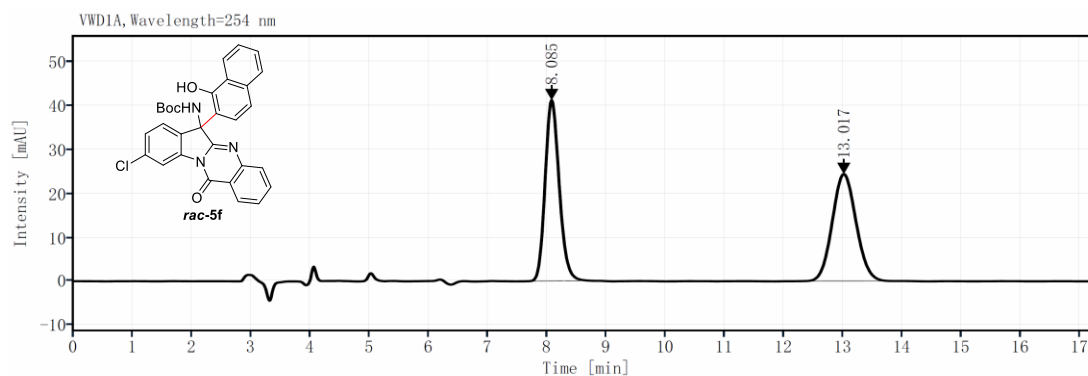

Signal:

VWD1A, Wavelength=254 nm

| Retention Time [min] | Peak Width [min] | Peak Height [mAU] | Peak Height % | Peak Area [mAU*s] | Peak Area % |
|----------------------|------------------|-------------------|---------------|-------------------|-------------|
| 8.085                | 1.22             | 41.26             | 62.81         | 683.193           | 49.95       |
| 13.017               | 1.77             | 24.43             | 37.19         | 684.593           | 50.05       |
| Total                |                  |                   |               |                   | 100.00      |

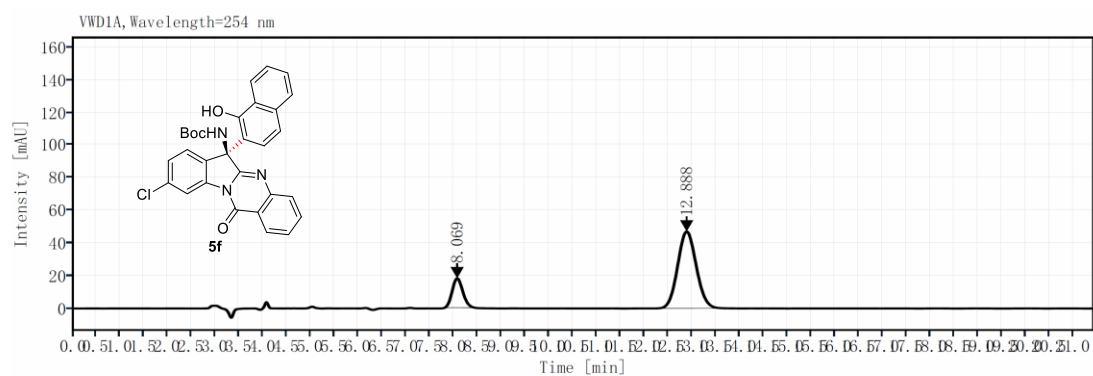

Signal:

VWD1A, Wavelength=254 nm

| Retention Time [min] | Peak Width [min] | Peak Height [mAU] | Peak Height % | Peak Area [mAU*s] | Peak Area % |
|----------------------|------------------|-------------------|---------------|-------------------|-------------|
| 8.069                | 0.62             | 17.96             | 27.61         | 277.282           | 17.78       |
| 12.888               | 2.03             | 47.09             | 72.39         | 1282.423          | 82.22       |
| Total                |                  |                   |               |                   | 100.00      |

# HPLC spectra of 5g

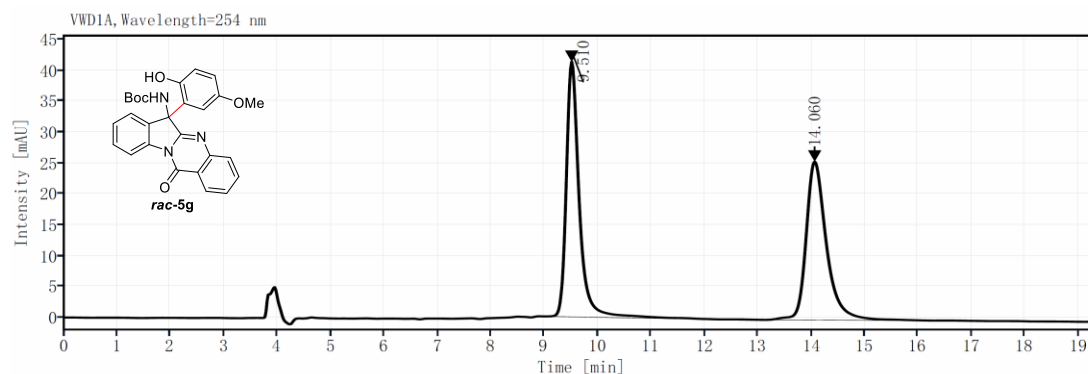

Signal:

VWD1A, Wavelength=254 nm

| Retention Time [min] | Peak Width [min] | Peak Height [mAU] | Peak Height % | Peak Area [mAU*s] | Peak Area % |
|----------------------|------------------|-------------------|---------------|-------------------|-------------|
| 9.510                | 3.25             | 41.35             | 61.68         | 702.223           | 50.67       |
| 14.060               | 3.18             | 25.69             | 38.32         | 683.727           | 49.33       |
| Total                |                  |                   |               |                   | 100.00      |

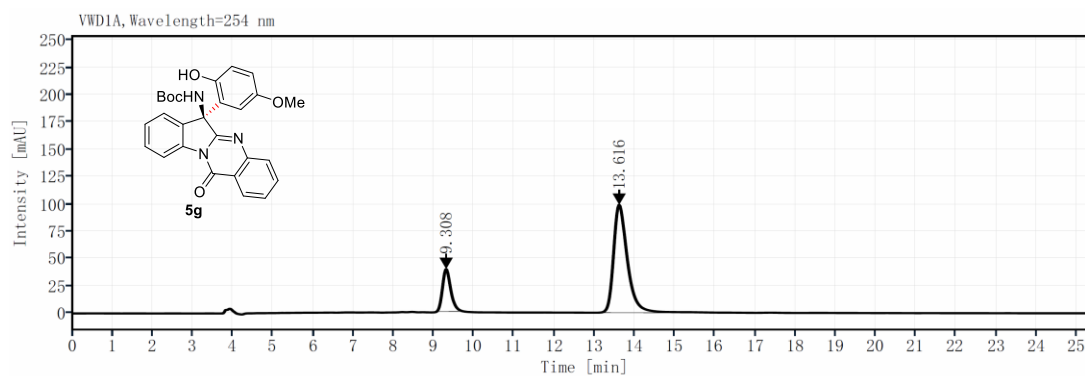

Signal:

VWD1A, Wavelength=254 nm

| Retention Time [min] | Peak Width [min] | Peak Height [mAU] | Peak Height % | Peak Area [mAU*s] | Peak Area % |
|----------------------|------------------|-------------------|---------------|-------------------|-------------|
| 9.308                | 0.64             | 38.65             | 28.11         | 548.806           | 18.60       |
| 13.616               | 4.04             | 98.87             | 71.89         | 2401.315          | 81.40       |
| Total                |                  |                   |               |                   | 100.00      |

# HPLC spectra of 5h

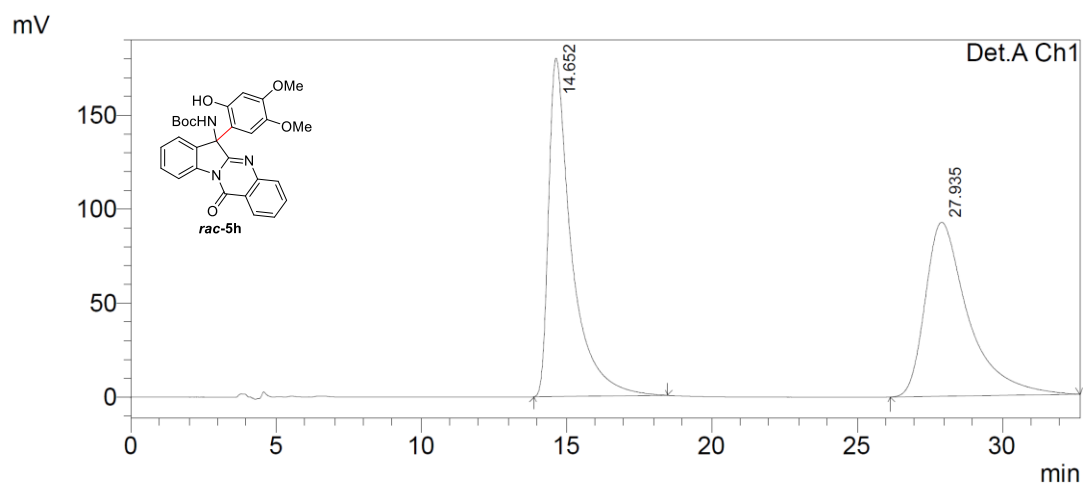

1 Det.A Ch1/254nm

PeakTable

Detector A Ch1 254nm

| Peak# | Ret. Time | Area     | Height | Area %  |
|-------|-----------|----------|--------|---------|
| 1     | 14.652    | 9871392  | 180039 | 50.793  |
| 2     | 27.935    | 9563053  | 92566  | 49.207  |
| Total |           | 19434446 |        | 100.000 |

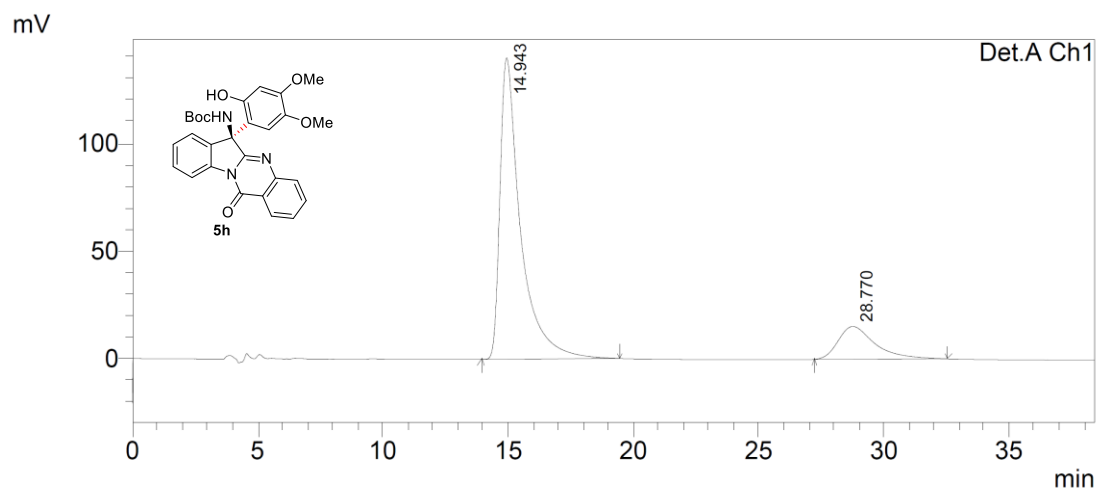

1 Det.A Ch1/254nm

PeakTable

Detector A Ch1 254nm

| Peak# | Ret. Time | Area    | Height | Area %  |
|-------|-----------|---------|--------|---------|
| 1     | 14.943    | 7970303 | 139895 | 83.686  |
| 2     | 28.770    | 1553704 | 15205  | 16.314  |
| Total |           | 9524008 |        | 100.000 |

## 12. $^1\text{H}$ and $^{13}\text{C}$ NMR spectra of compounds 1, 3 and 5

$^1\text{H}$  NMR and  $^{13}\text{C}$  NMR of **1g**

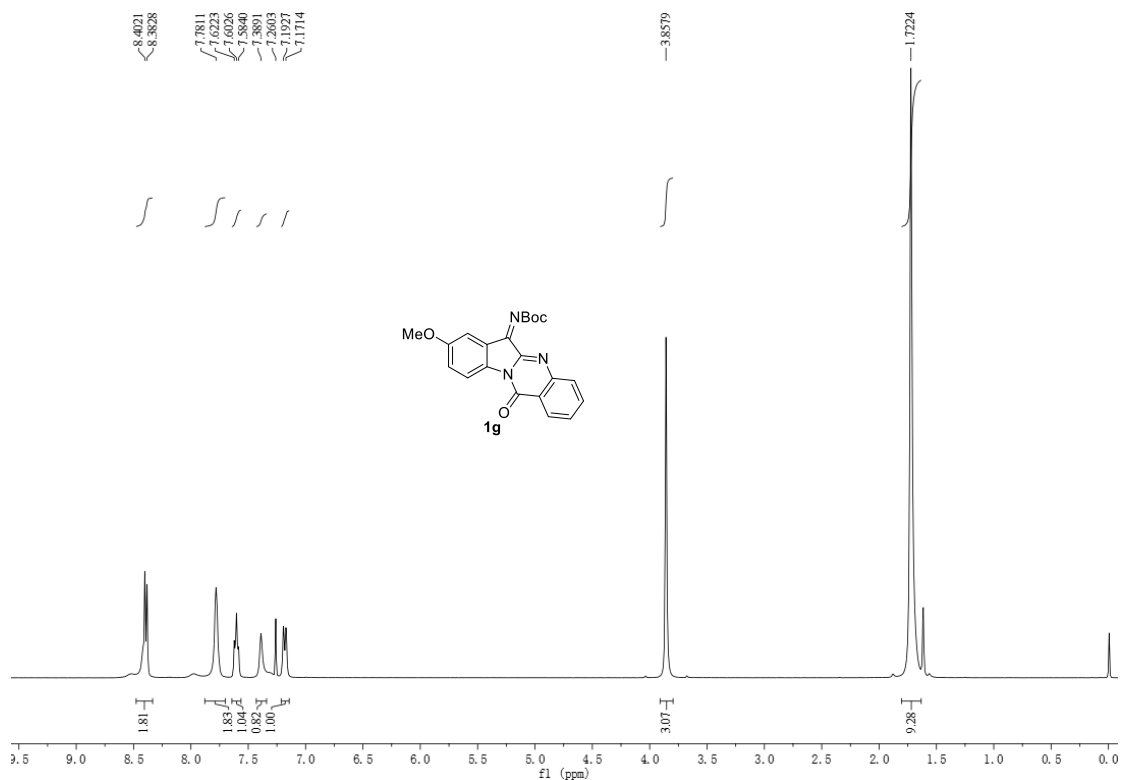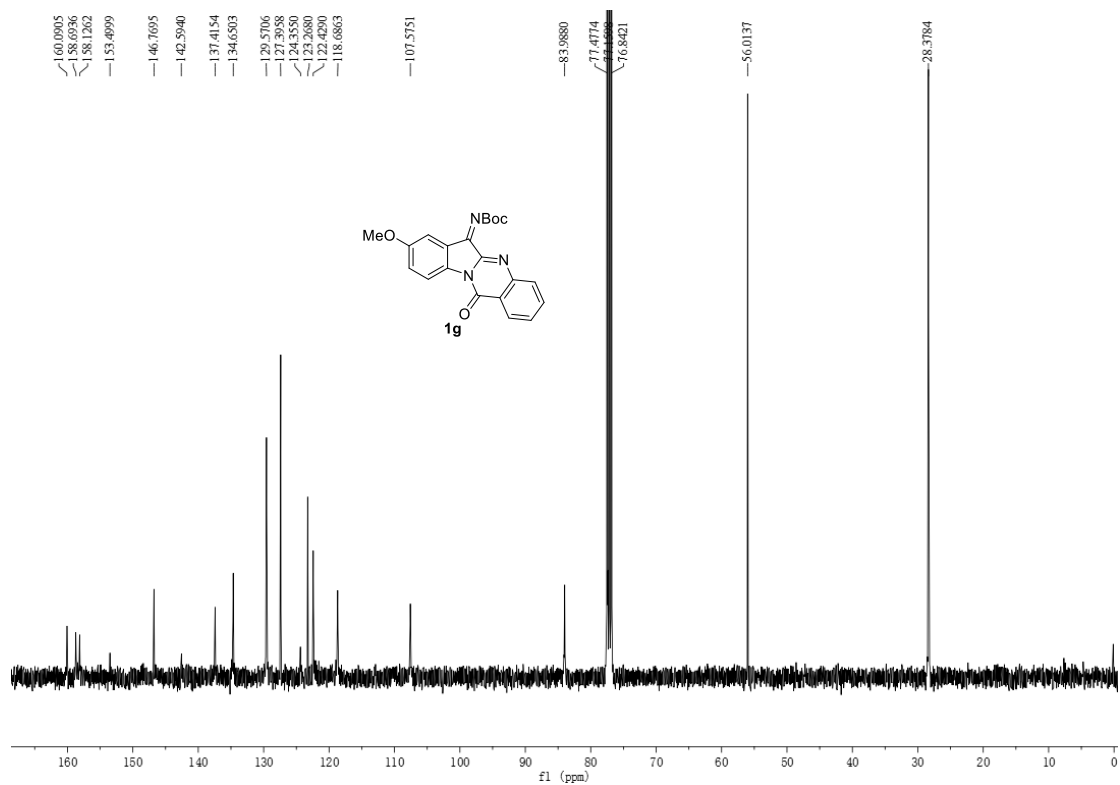

# <sup>1</sup>H NMR and <sup>13</sup>C NMR of **3a**

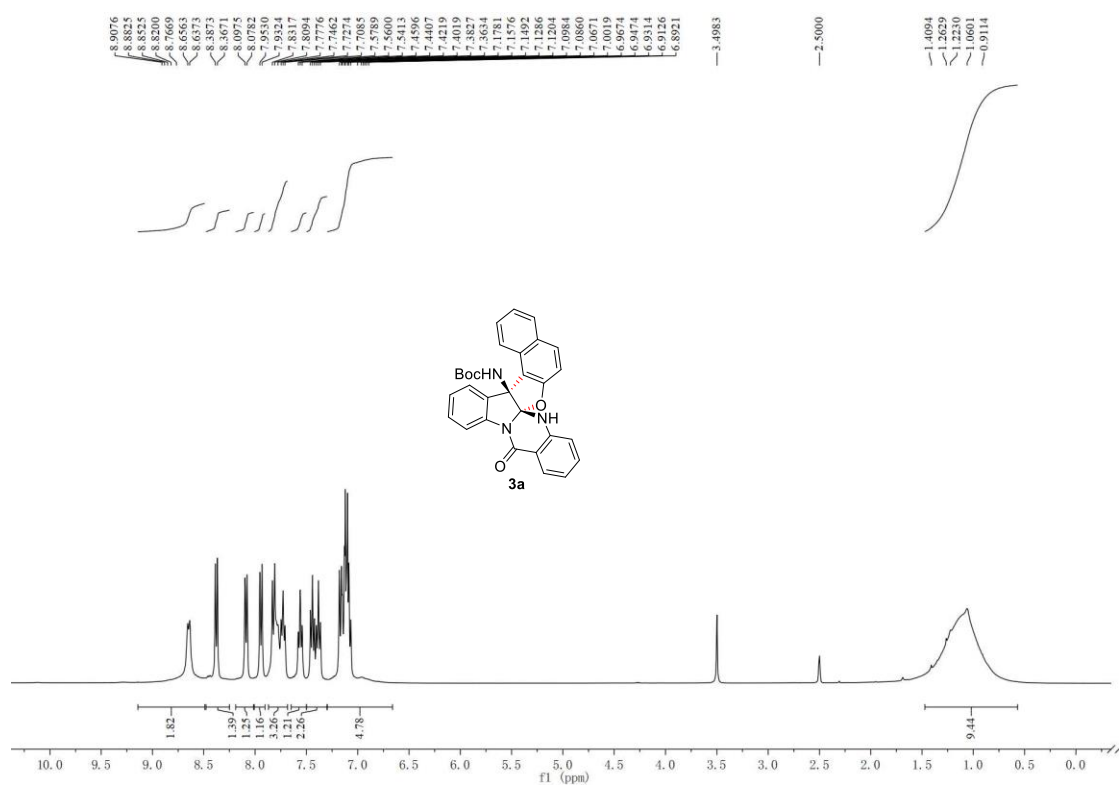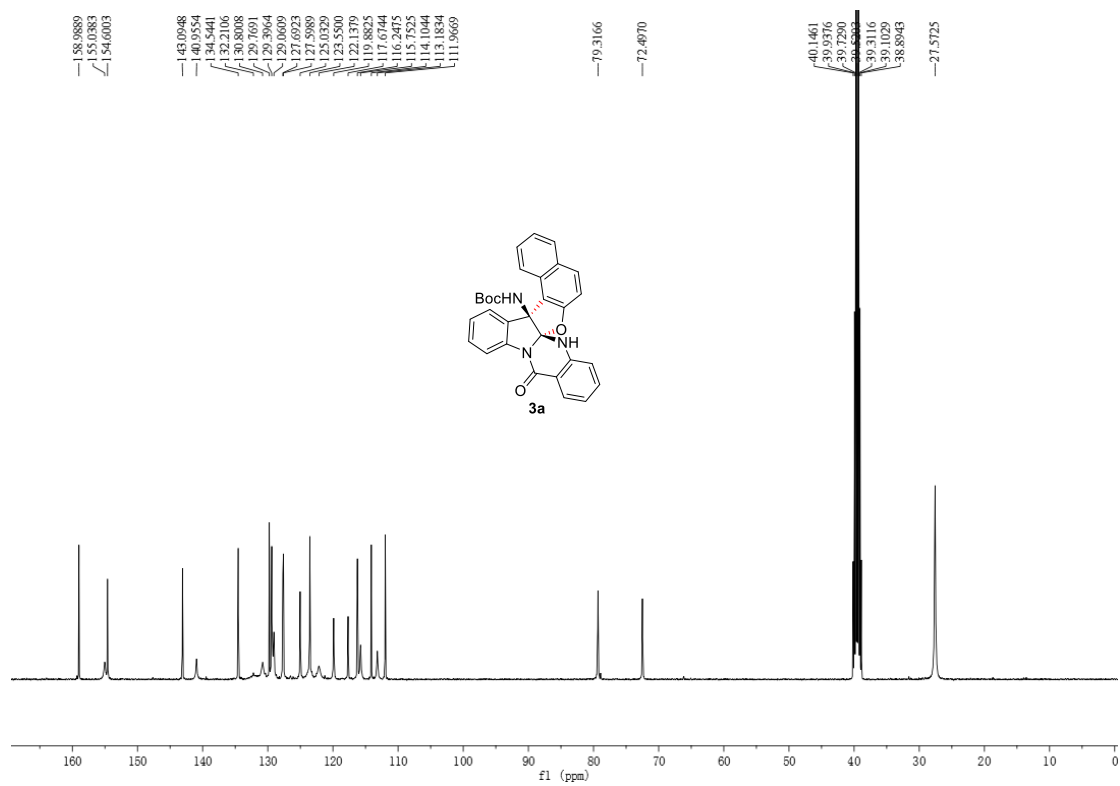

<sup>1</sup>H NMR and <sup>13</sup>C NMR of **3b**

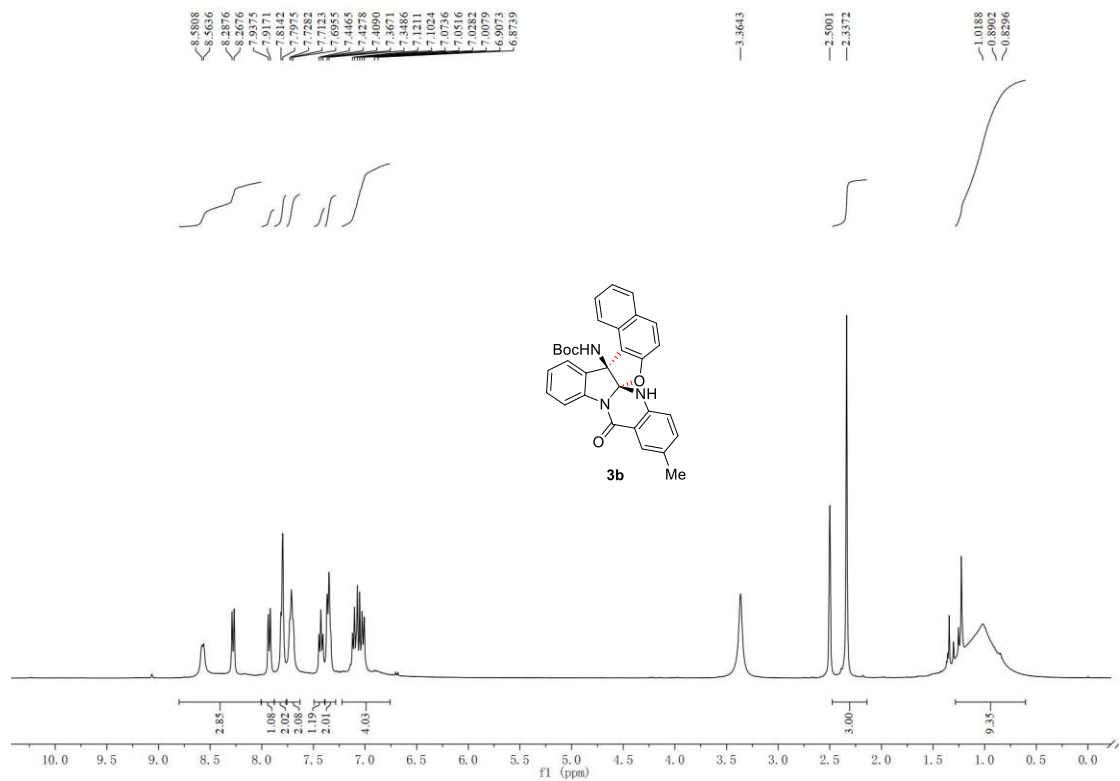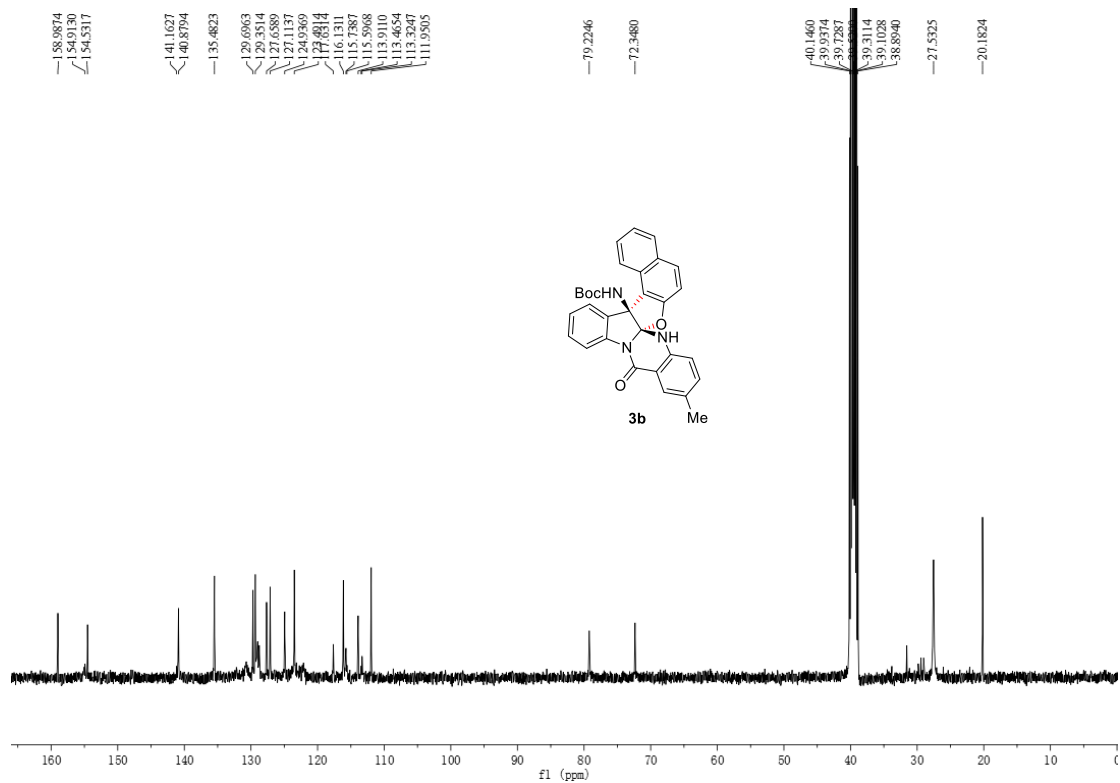

$^1\text{H}$  NMR and  $^{13}\text{C}$  NMR of **3c**

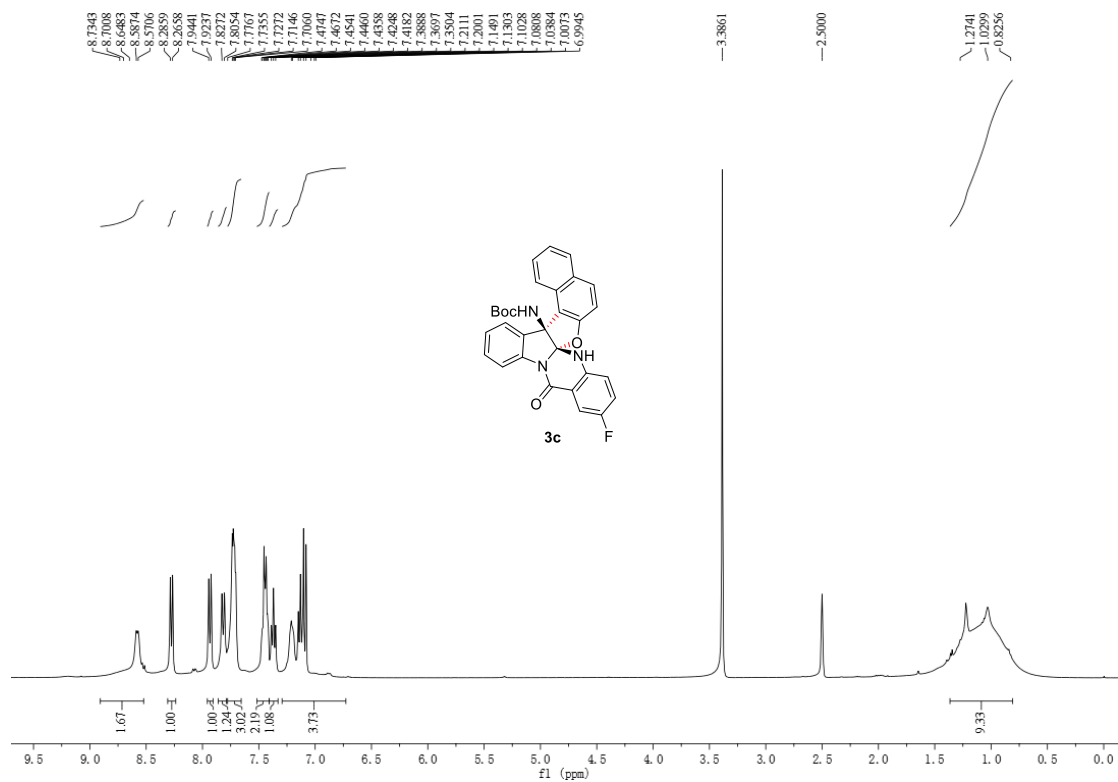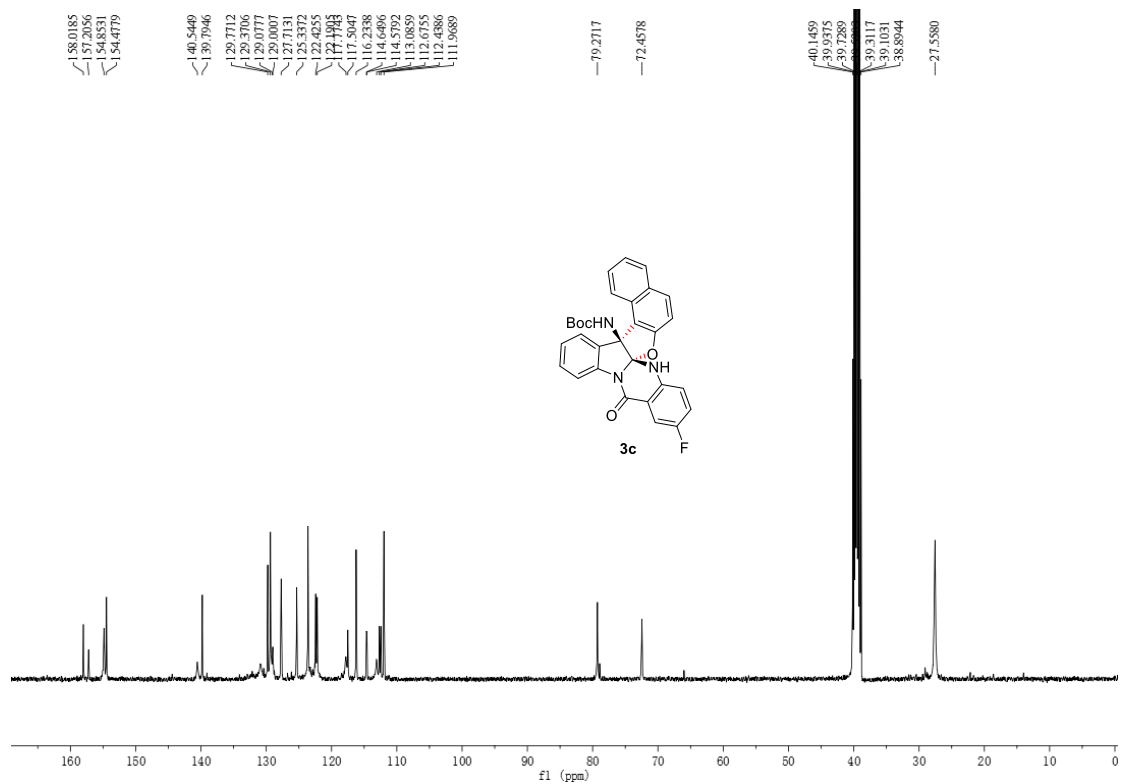

# <sup>1</sup>H NMR and <sup>13</sup>C NMR of **3d**

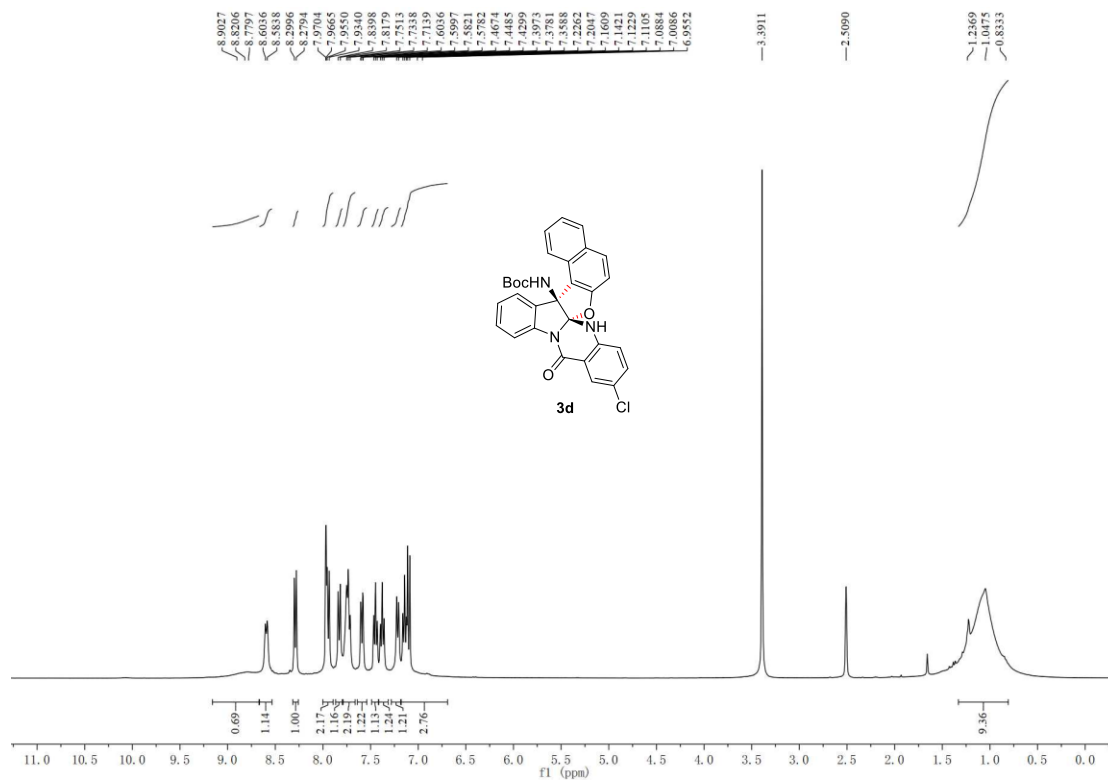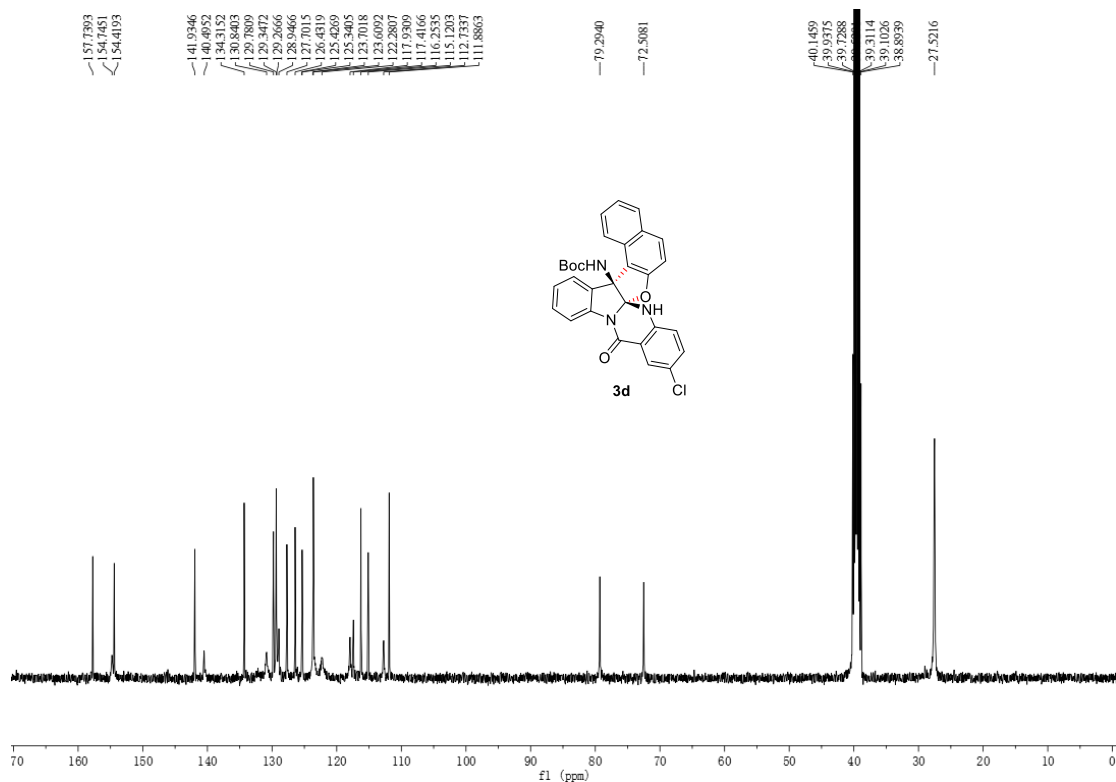

# <sup>1</sup>H NMR and <sup>13</sup>C NMR of **3e**

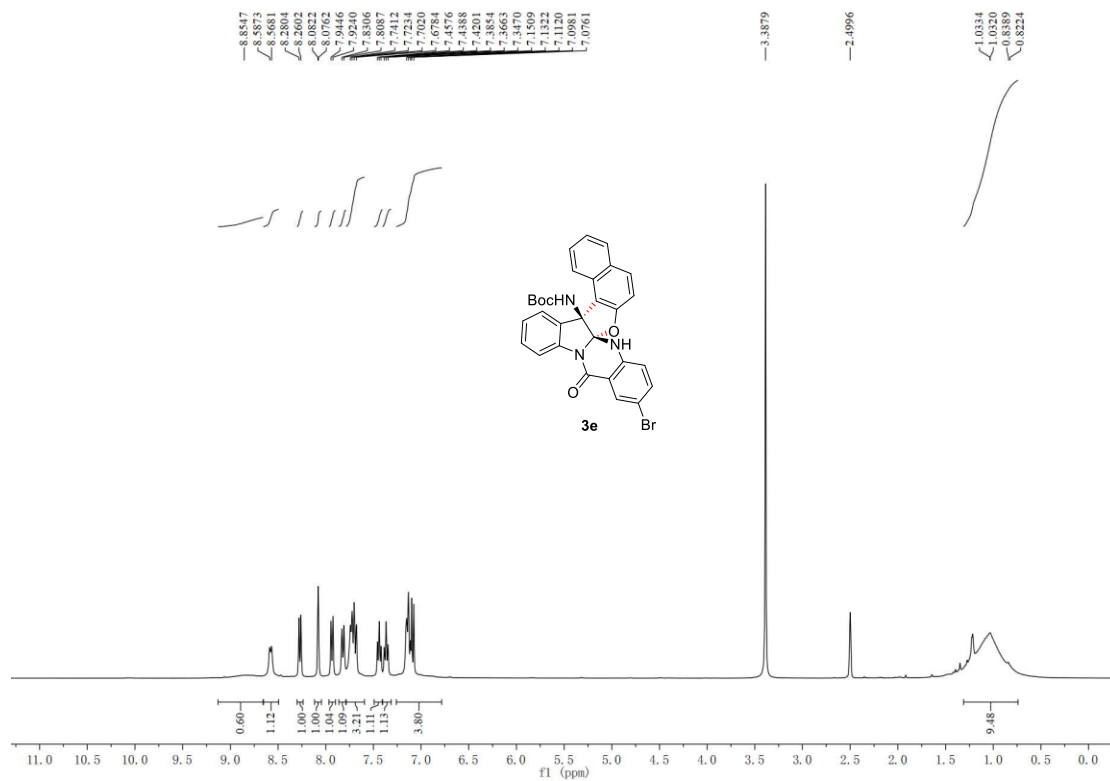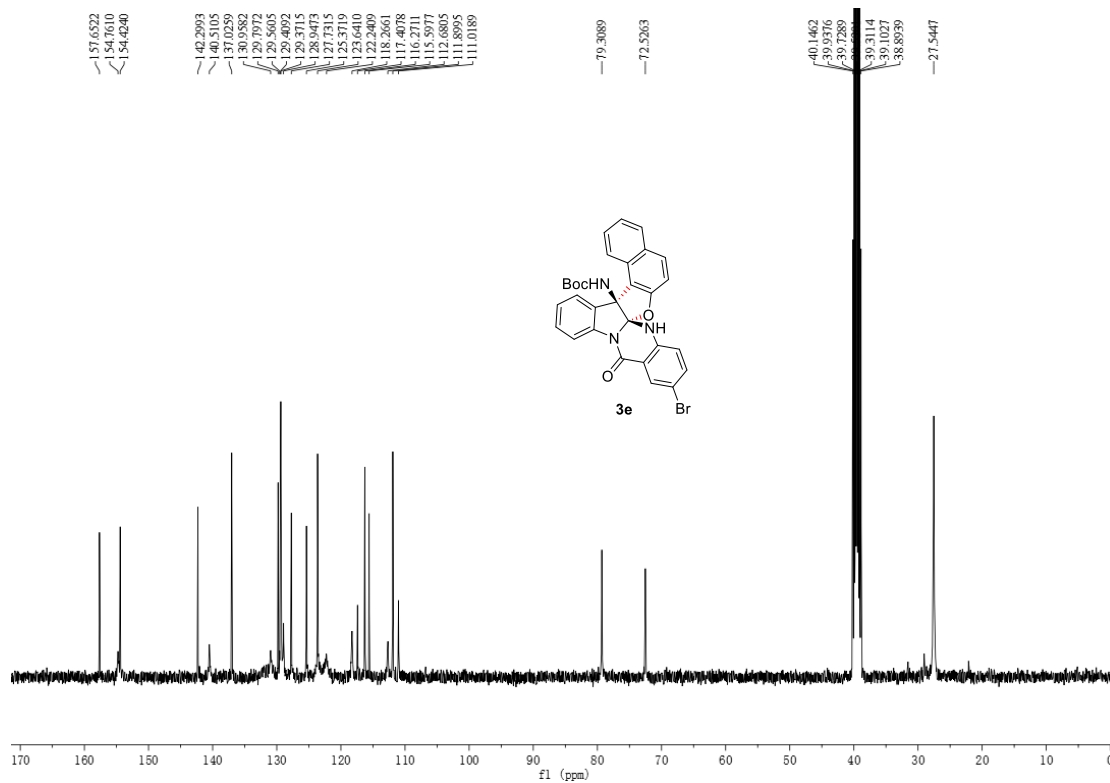

<sup>1</sup>H NMR and <sup>13</sup>C NMR of **3f**

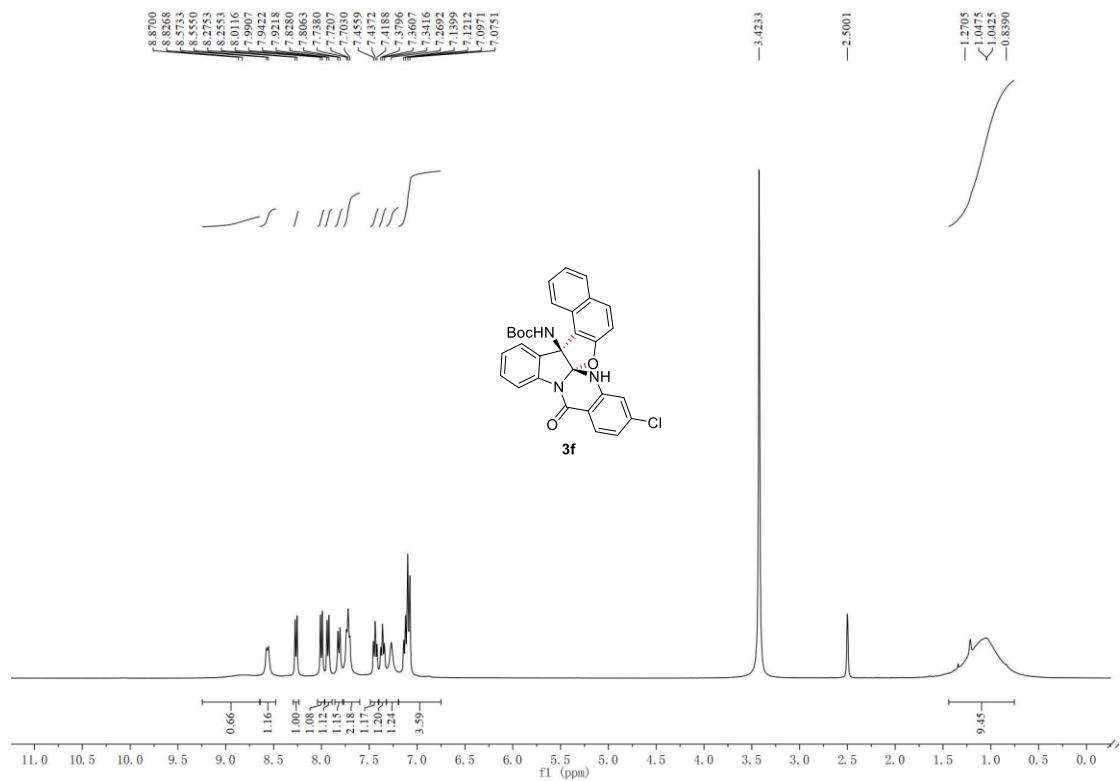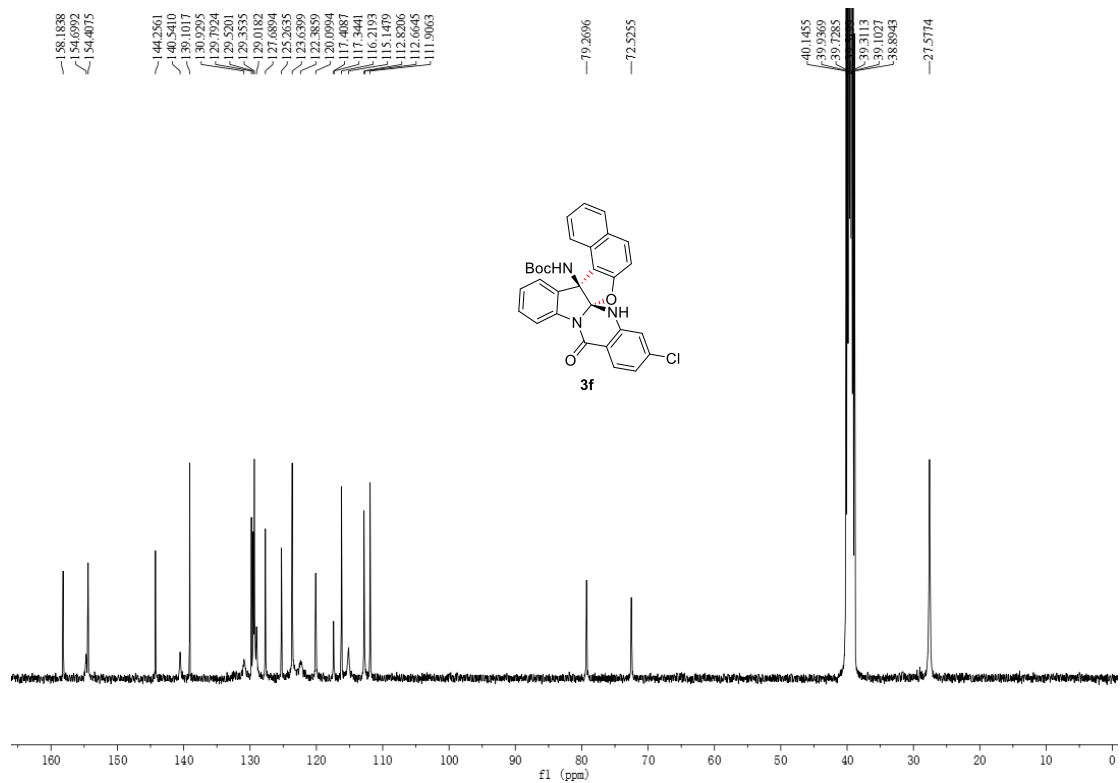

$^1\text{H}$  NMR and  $^{13}\text{C}$  NMR of **3g**

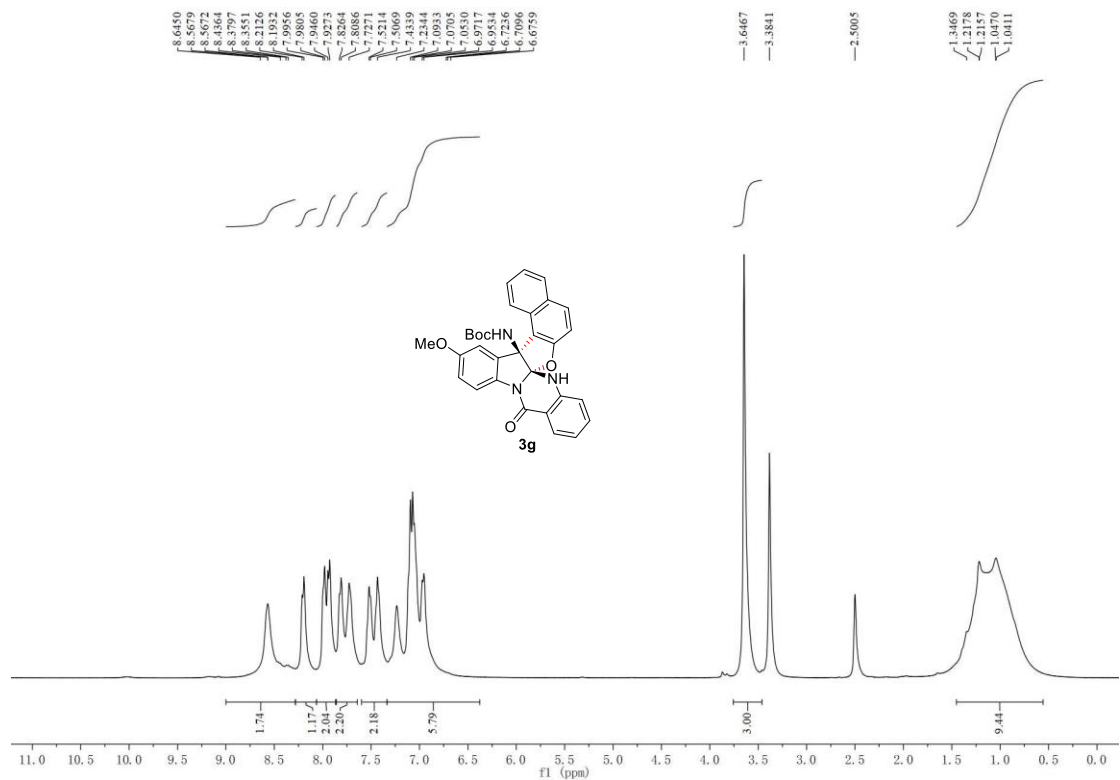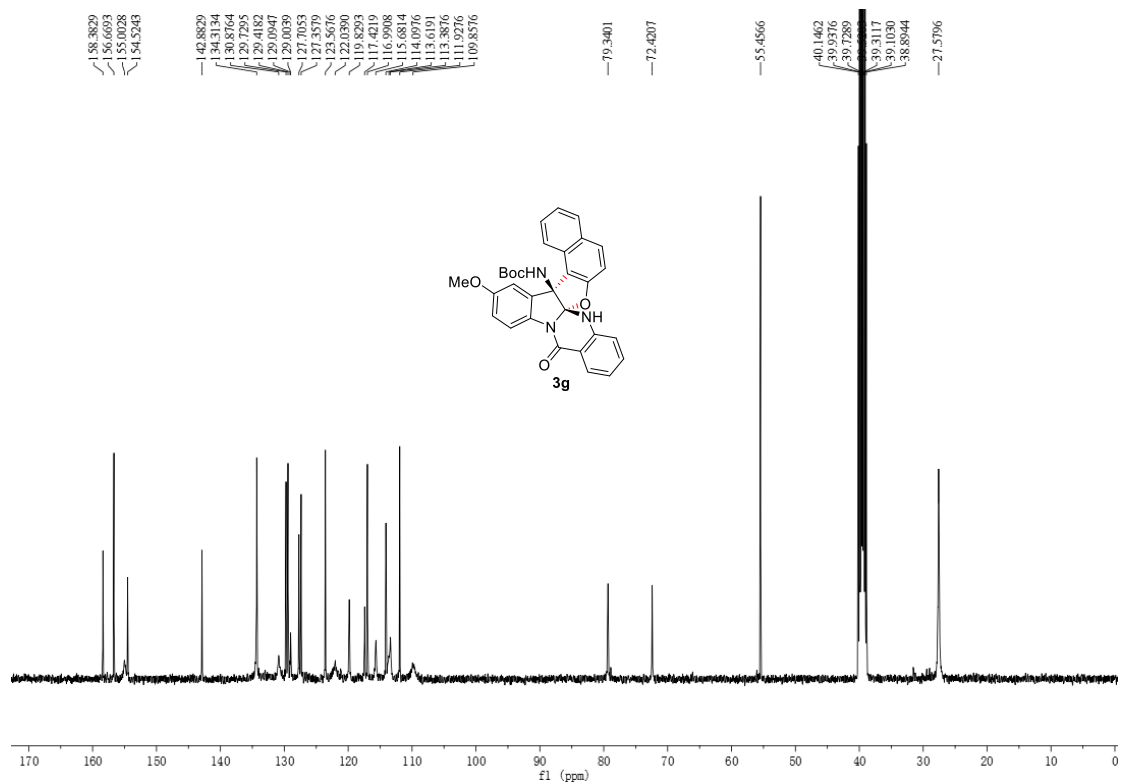

# <sup>1</sup>H NMR and <sup>13</sup>C NMR of **3h**

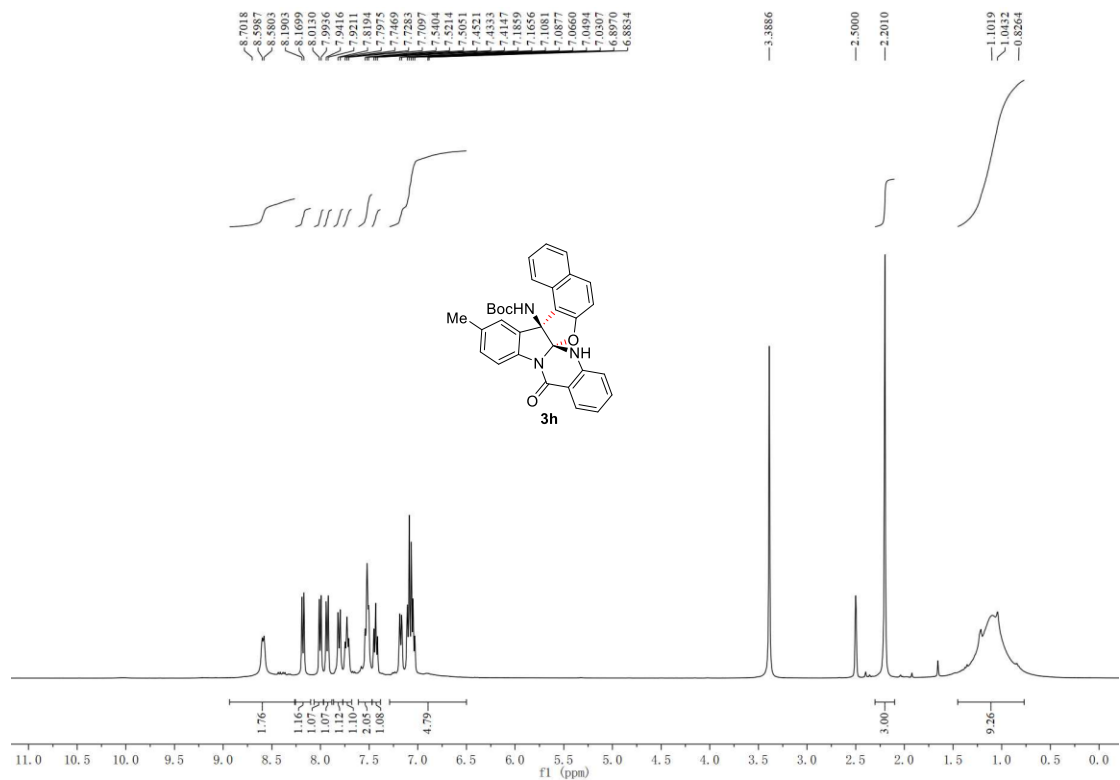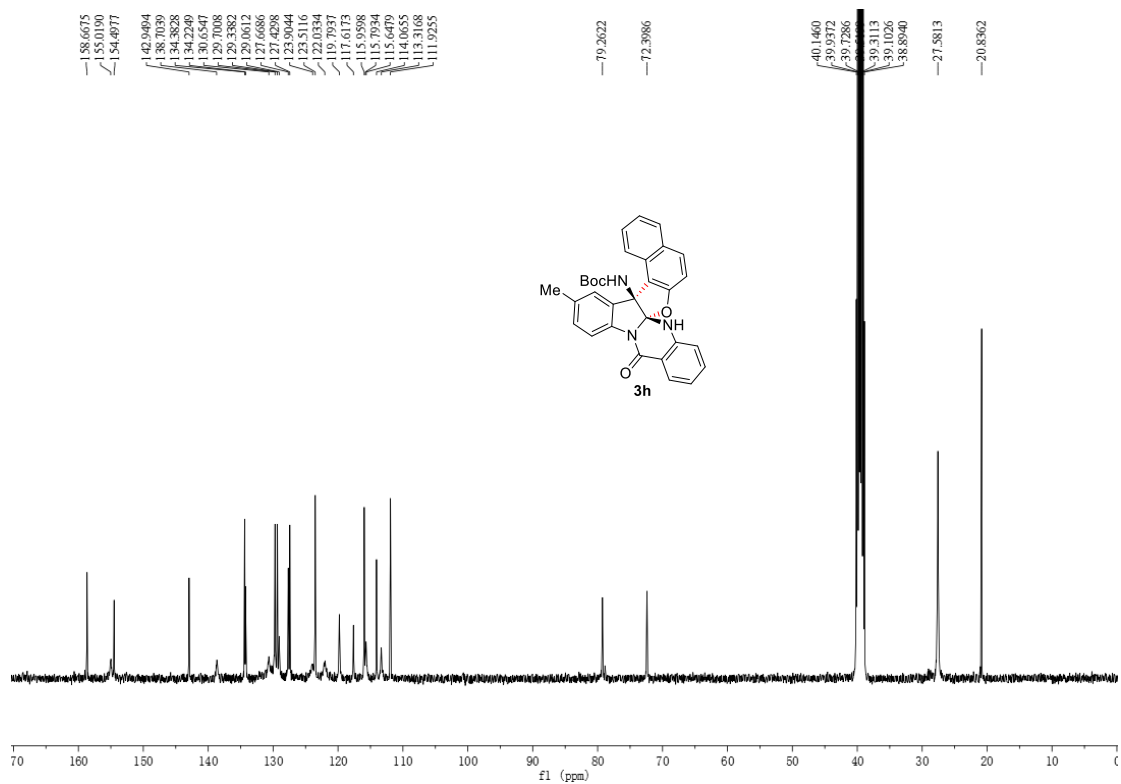

<sup>1</sup>H NMR and <sup>13</sup>C NMR of **3i**

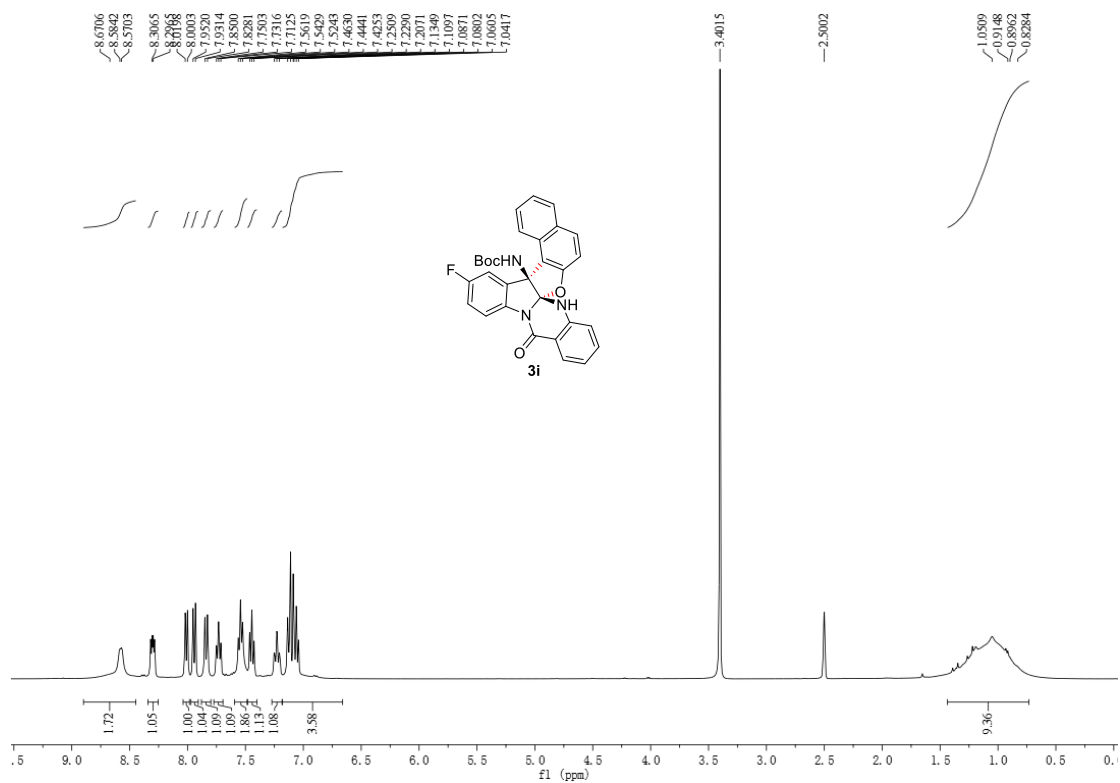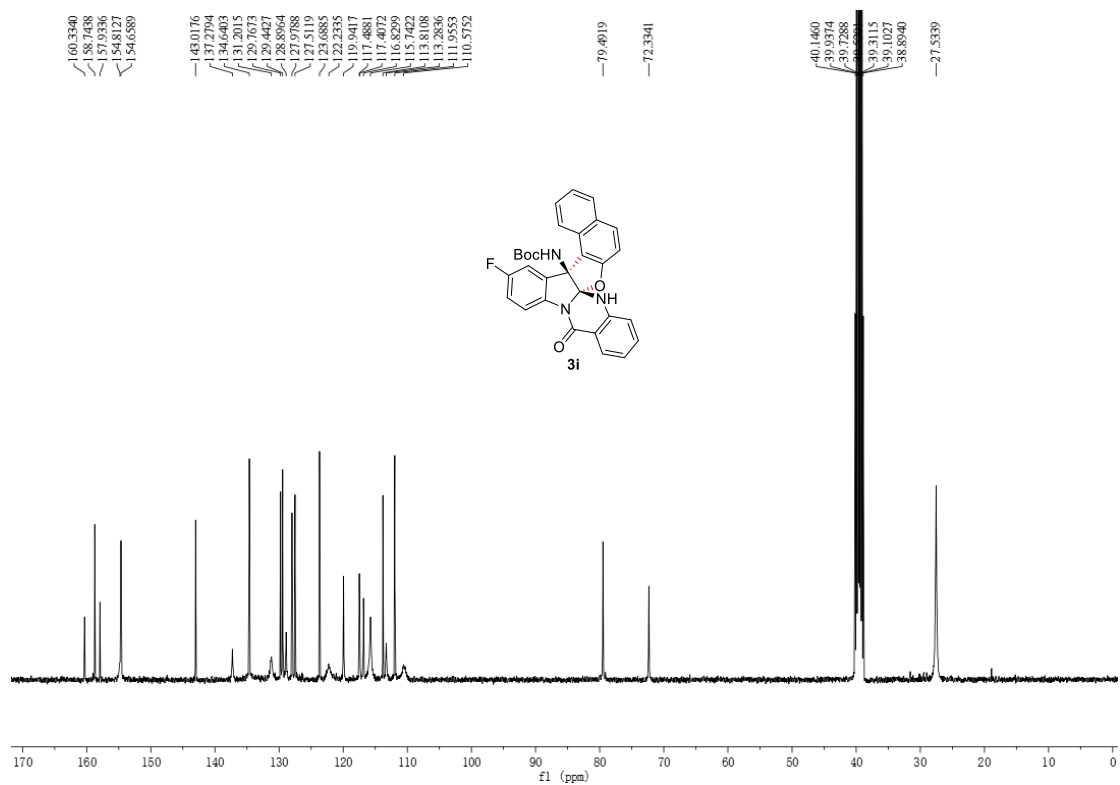

$^1\text{H}$  NMR and  $^{13}\text{C}$  NMR of **3j**

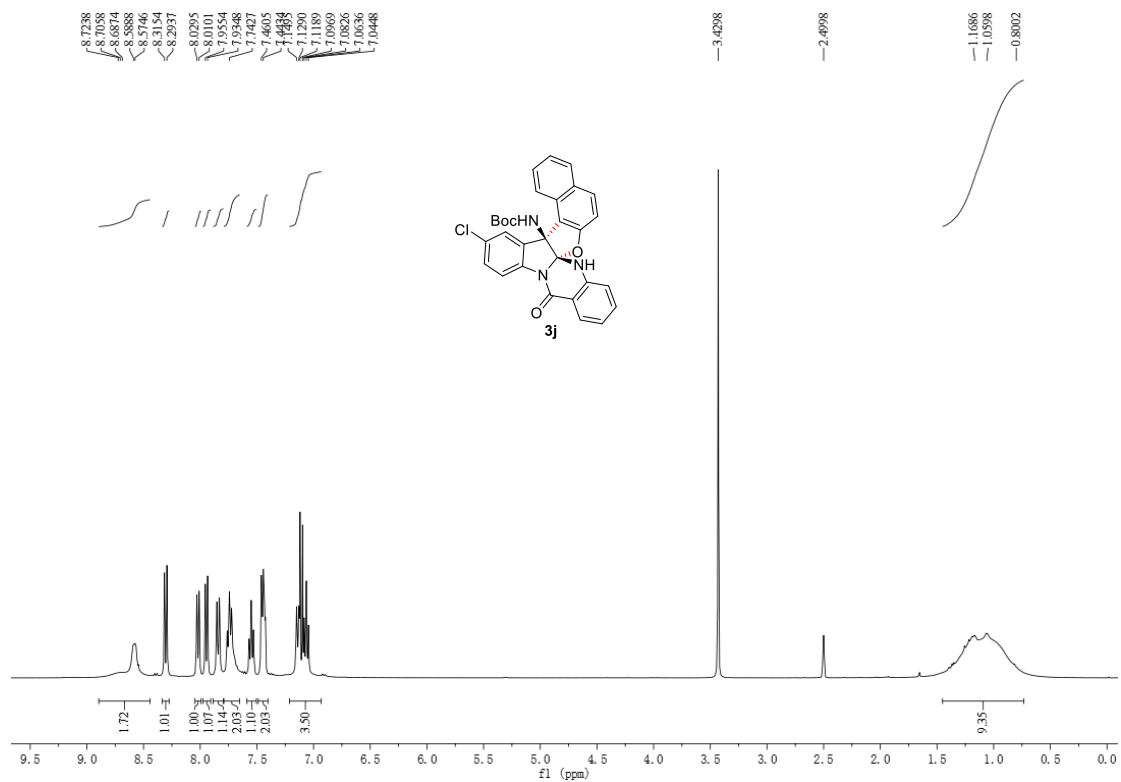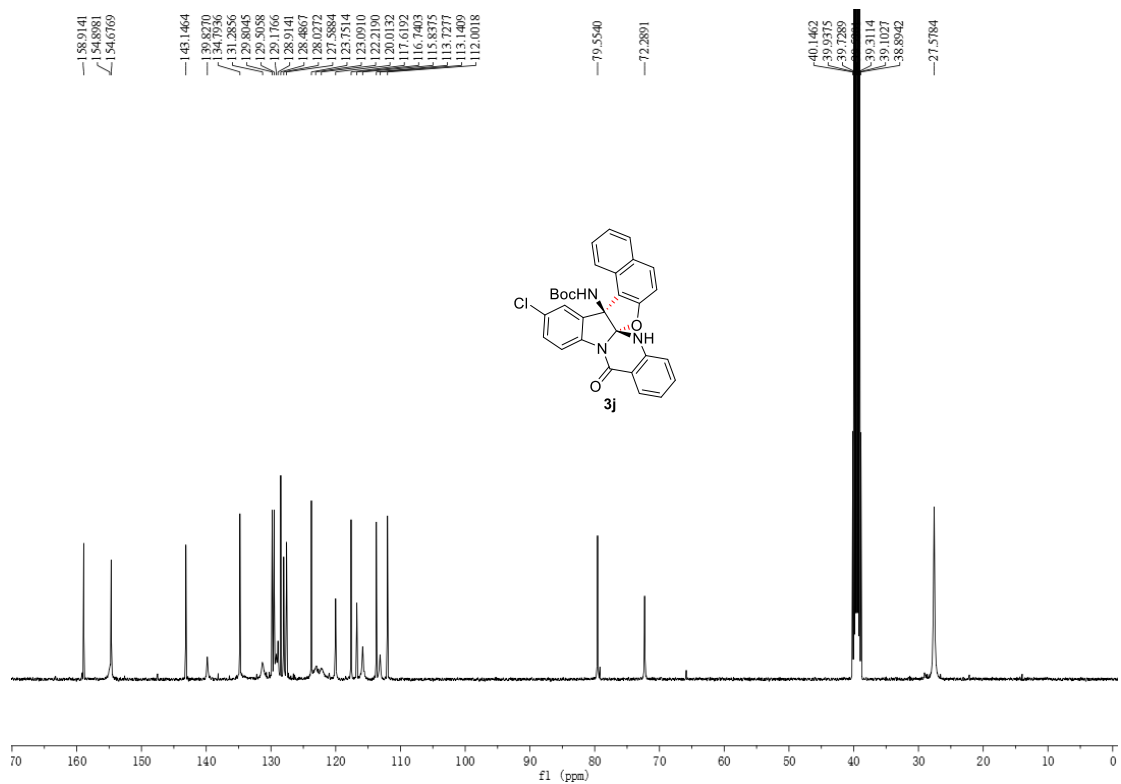

<sup>1</sup>H NMR and <sup>13</sup>C NMR of **3k**

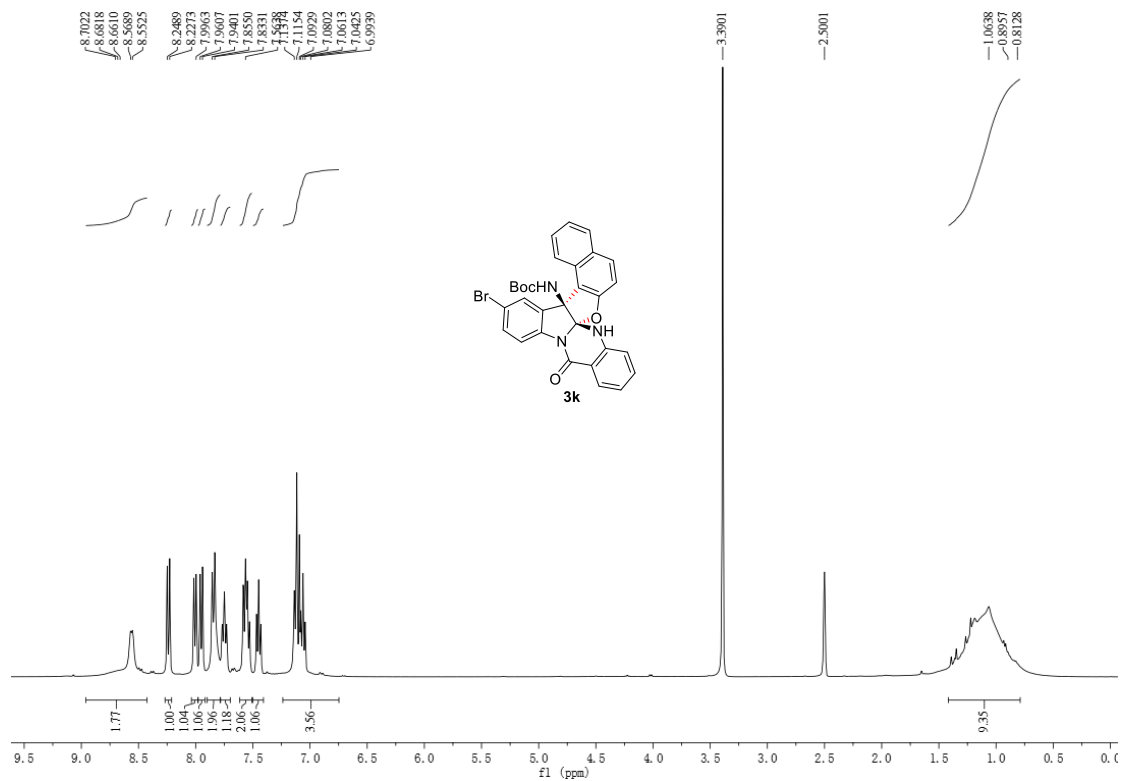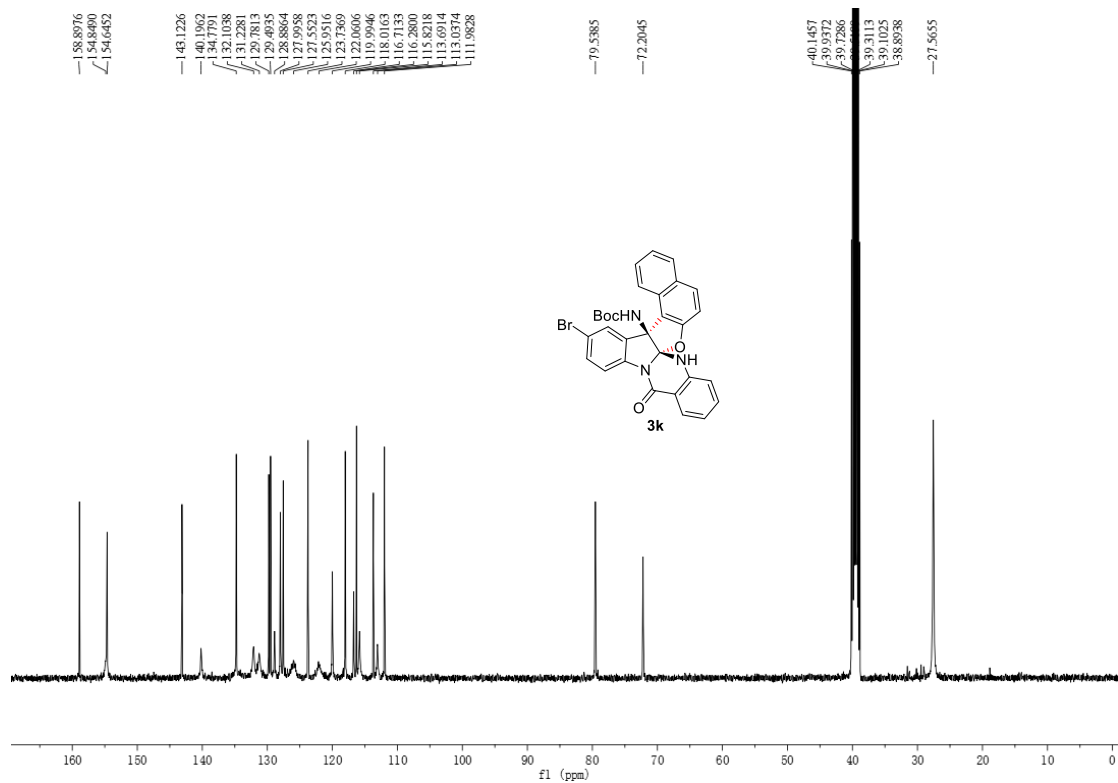

# <sup>1</sup>H NMR and <sup>13</sup>C NMR of **3I**

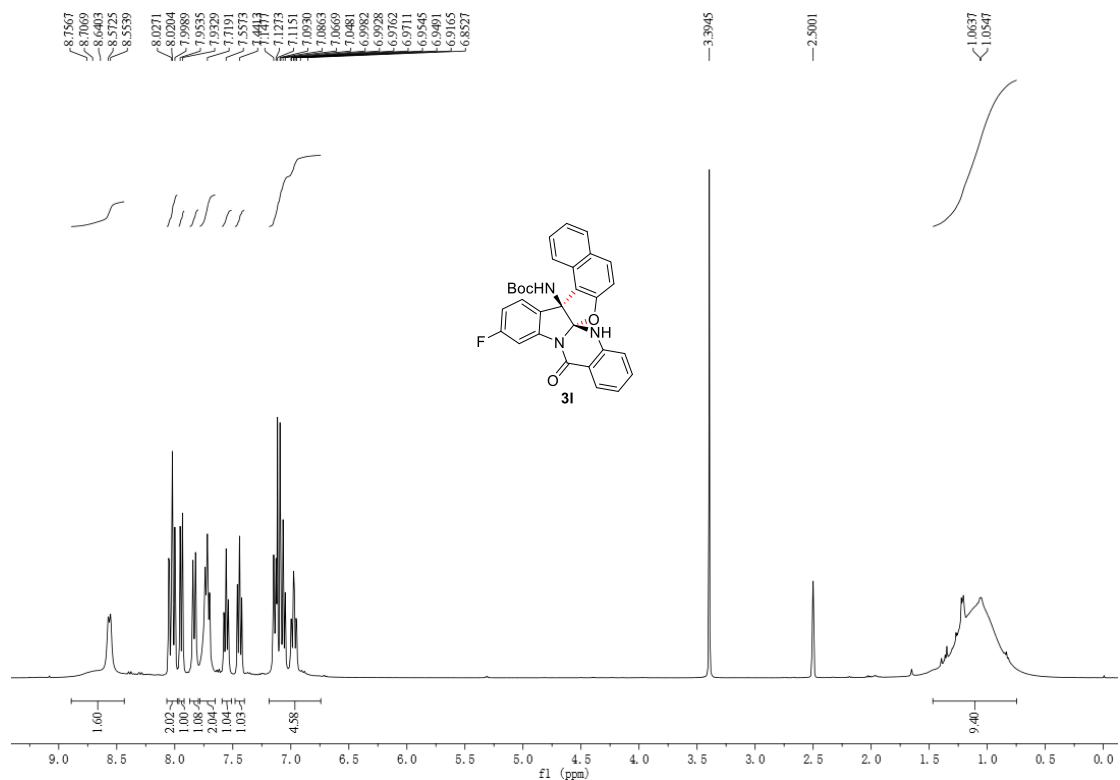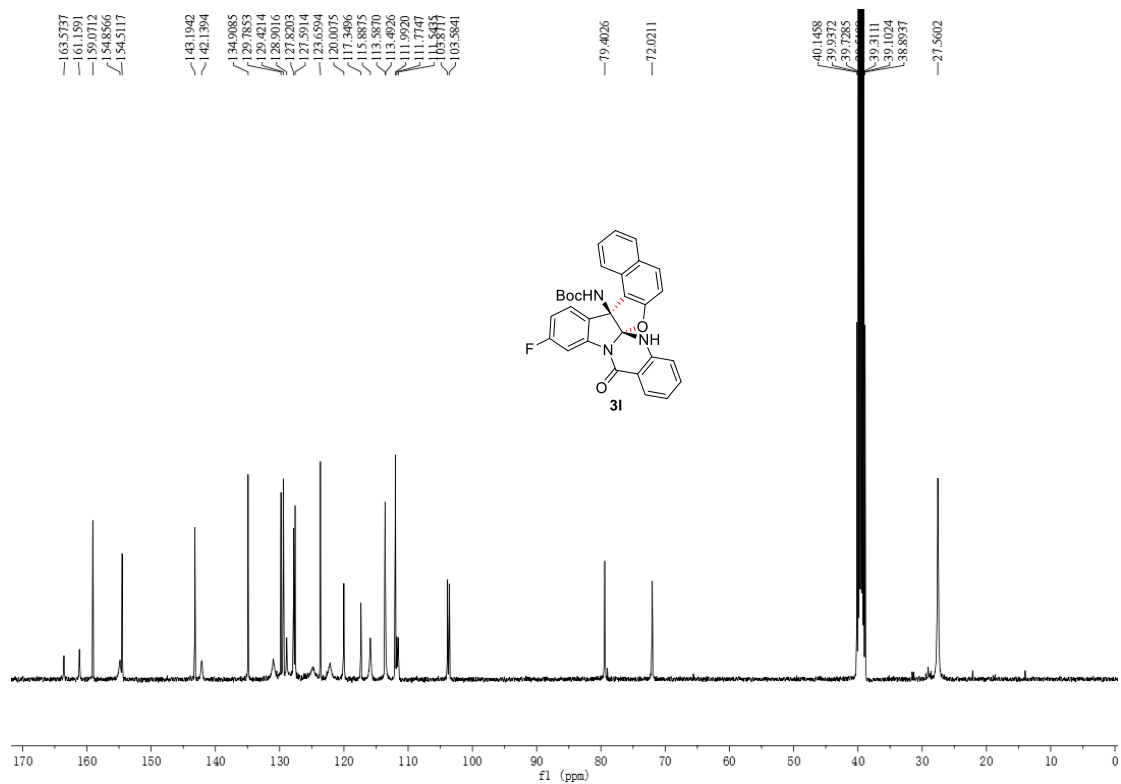

<sup>1</sup>H NMR and <sup>13</sup>C NMR of **3m**

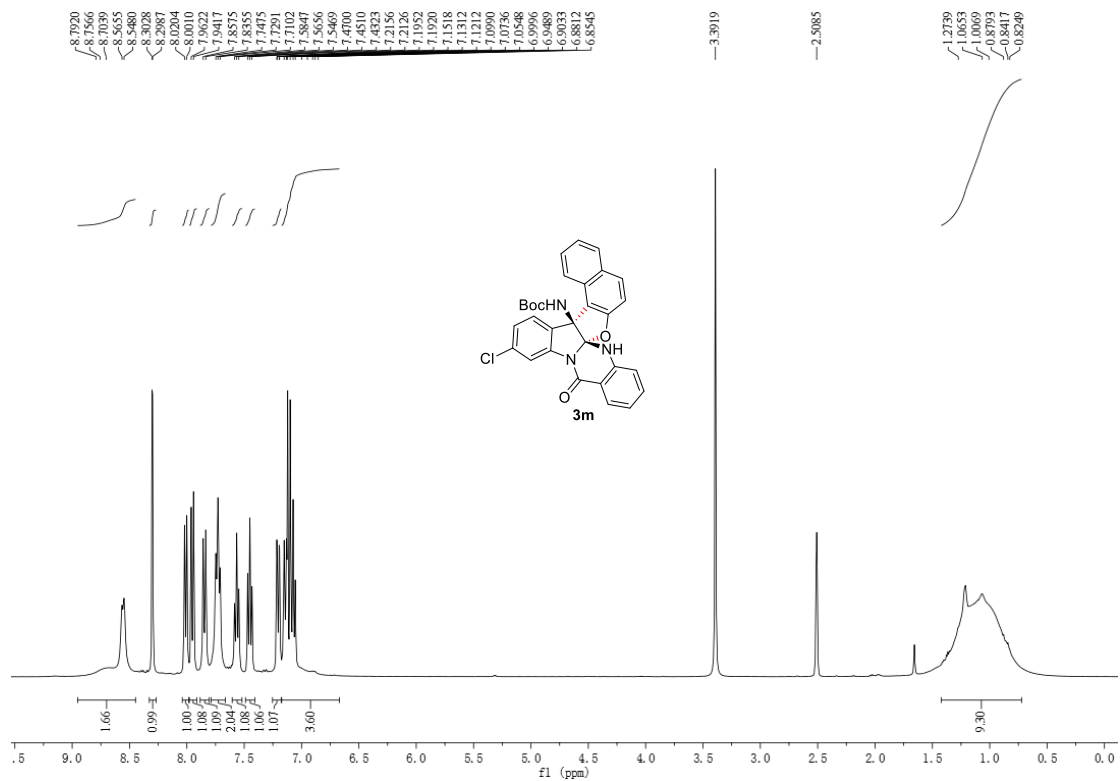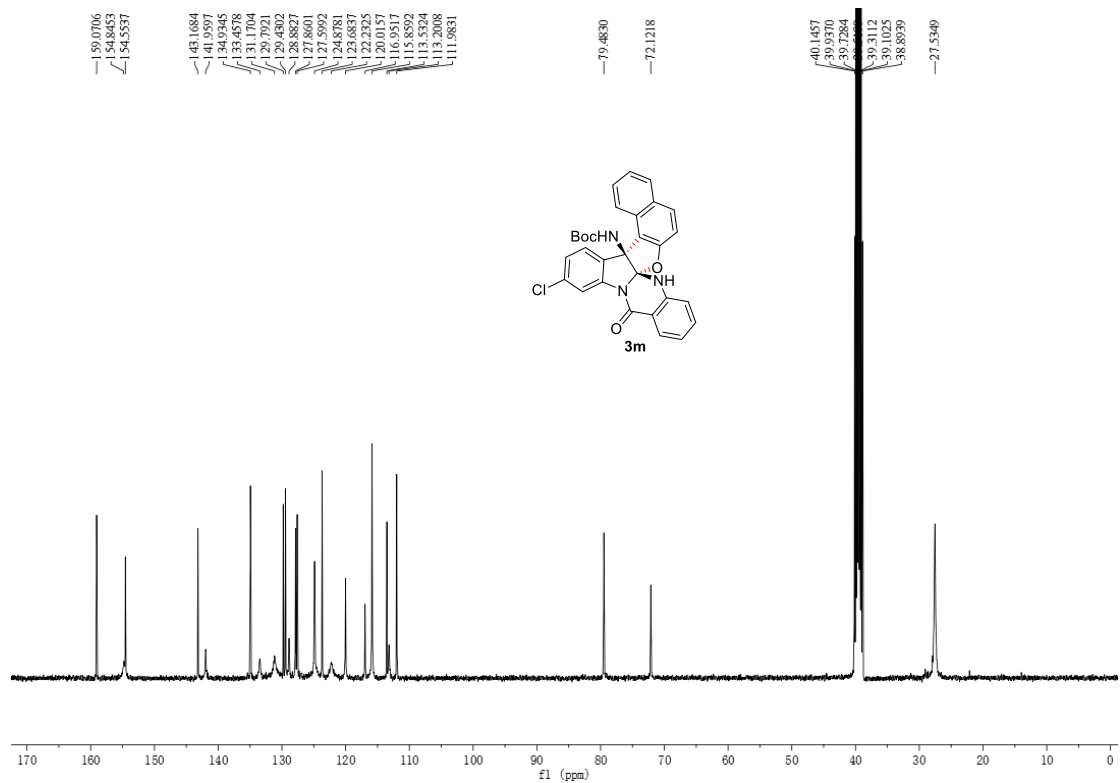

$^1\text{H}$  NMR and  $^{13}\text{C}$  NMR of **3n**

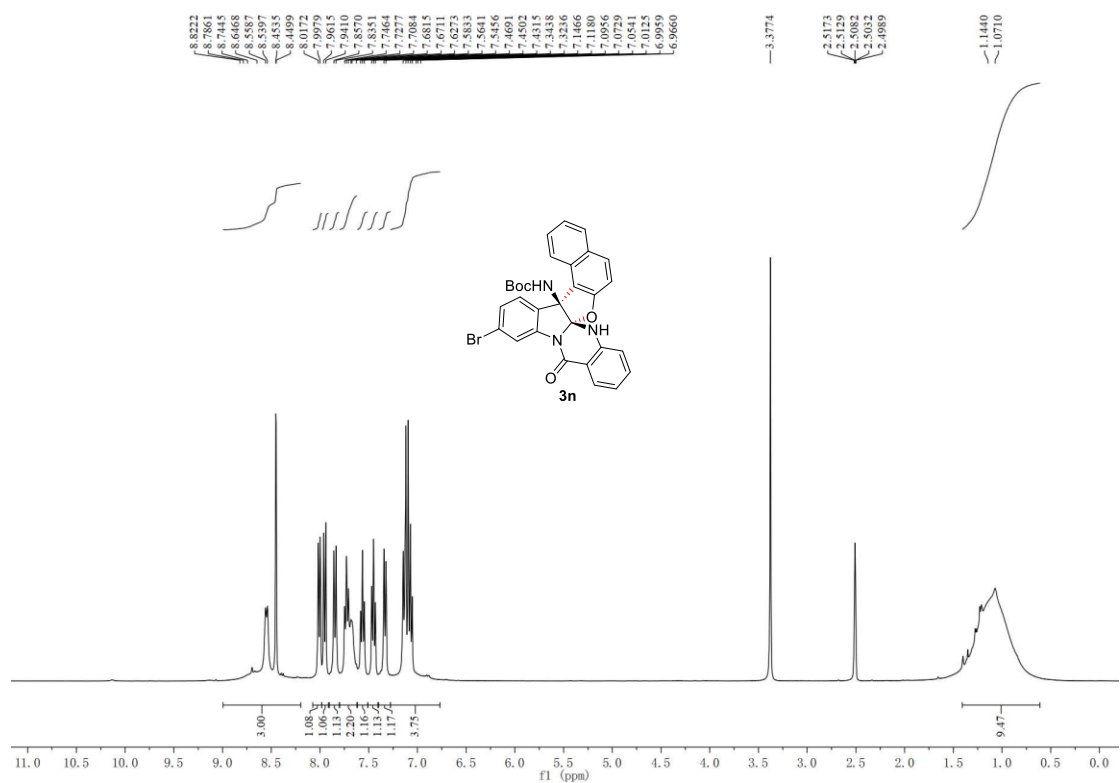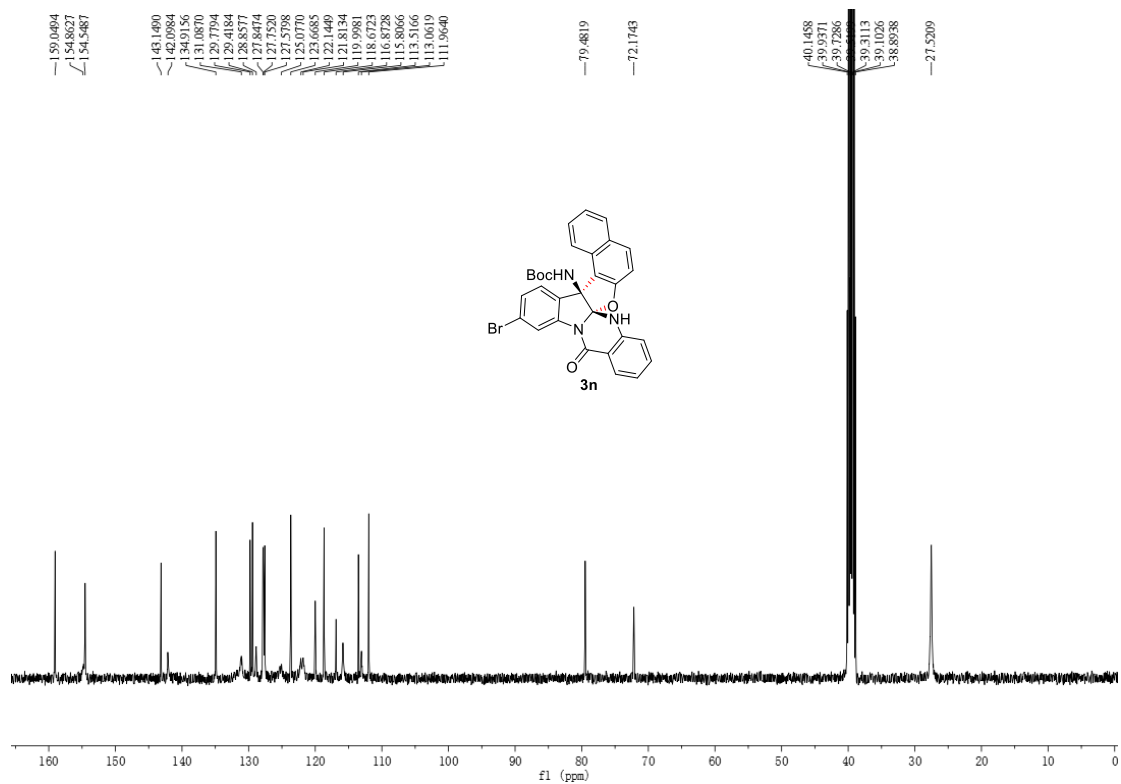

# <sup>1</sup>H NMR and <sup>13</sup>C NMR of **3o**

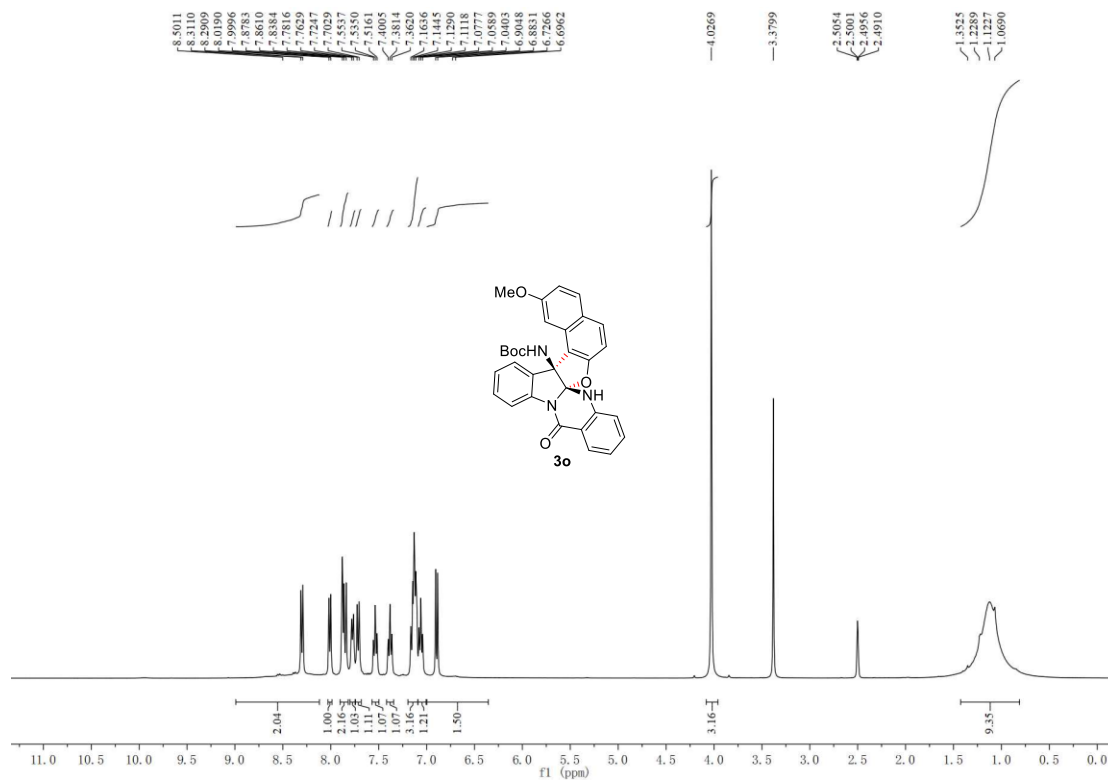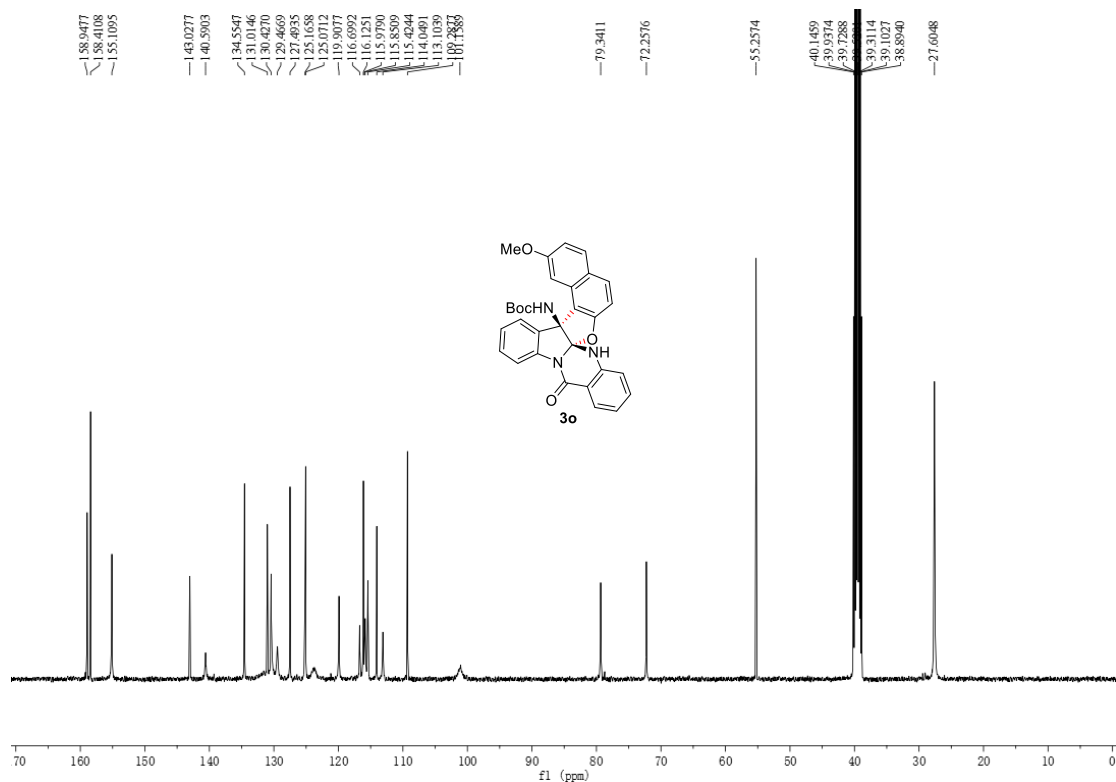

# <sup>1</sup>H NMR and <sup>13</sup>C NMR of 3p

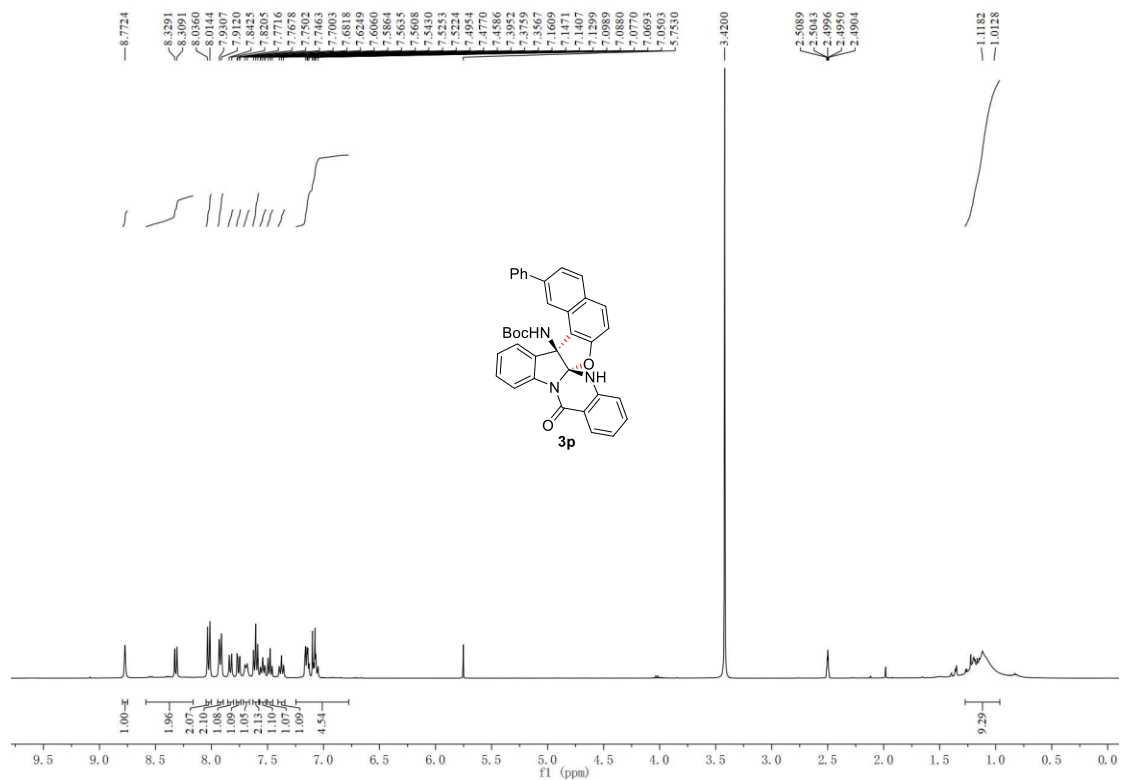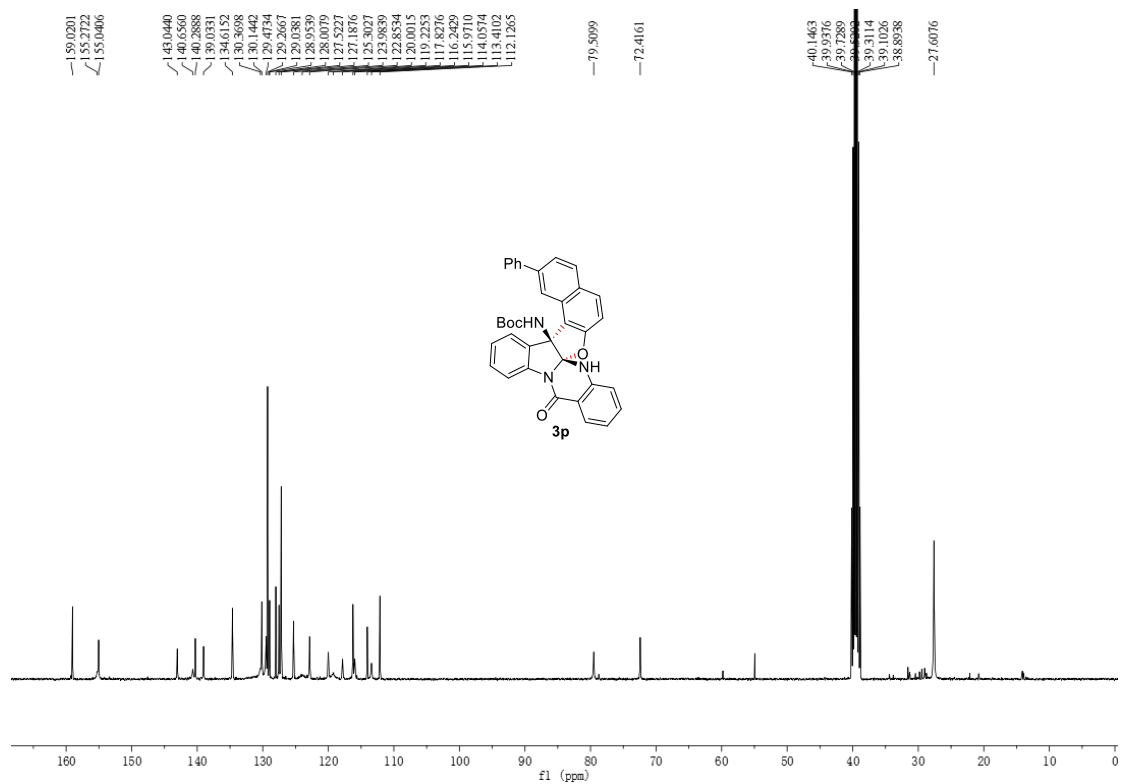

$^1\text{H}$  NMR and  $^{13}\text{C}$  NMR of **3q**

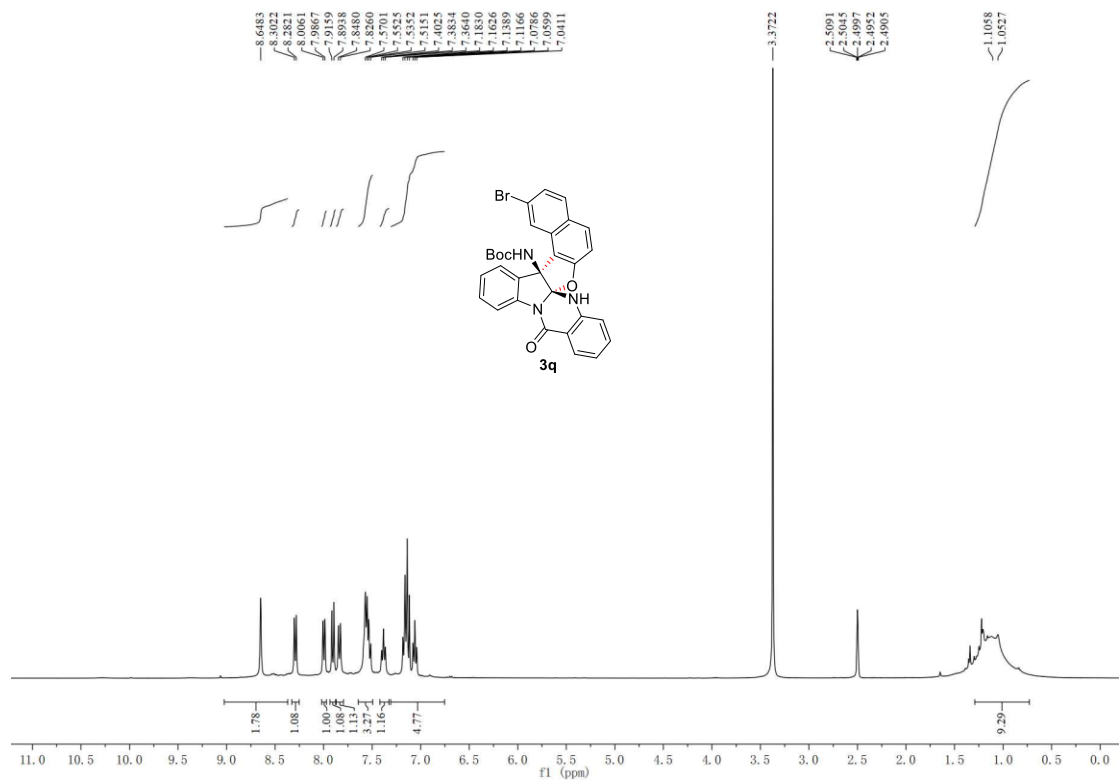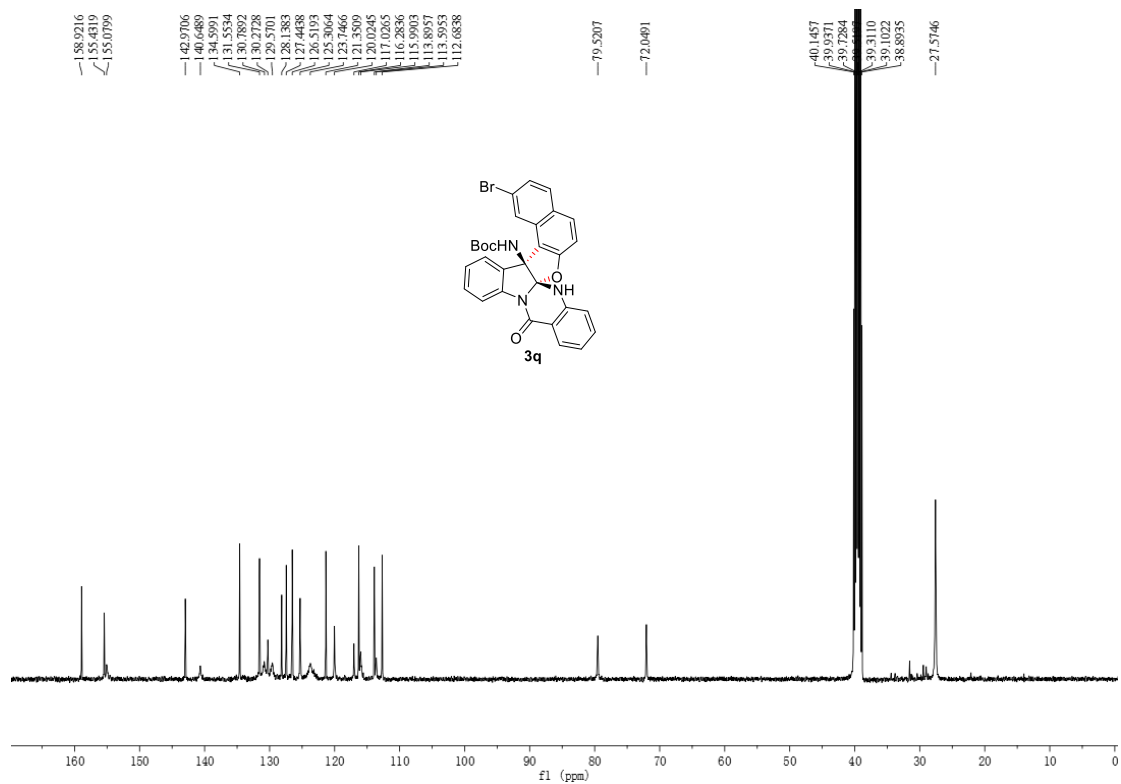

$^1\text{H}$  NMR and  $^{13}\text{C}$  NMR of **3r**

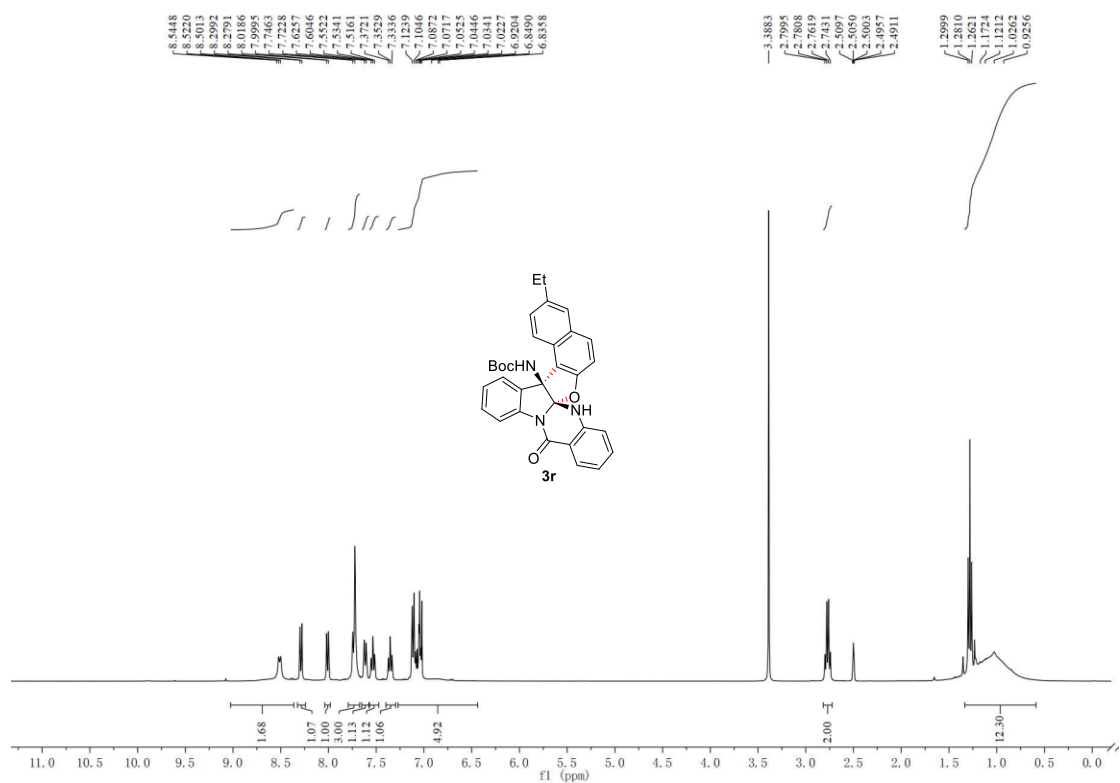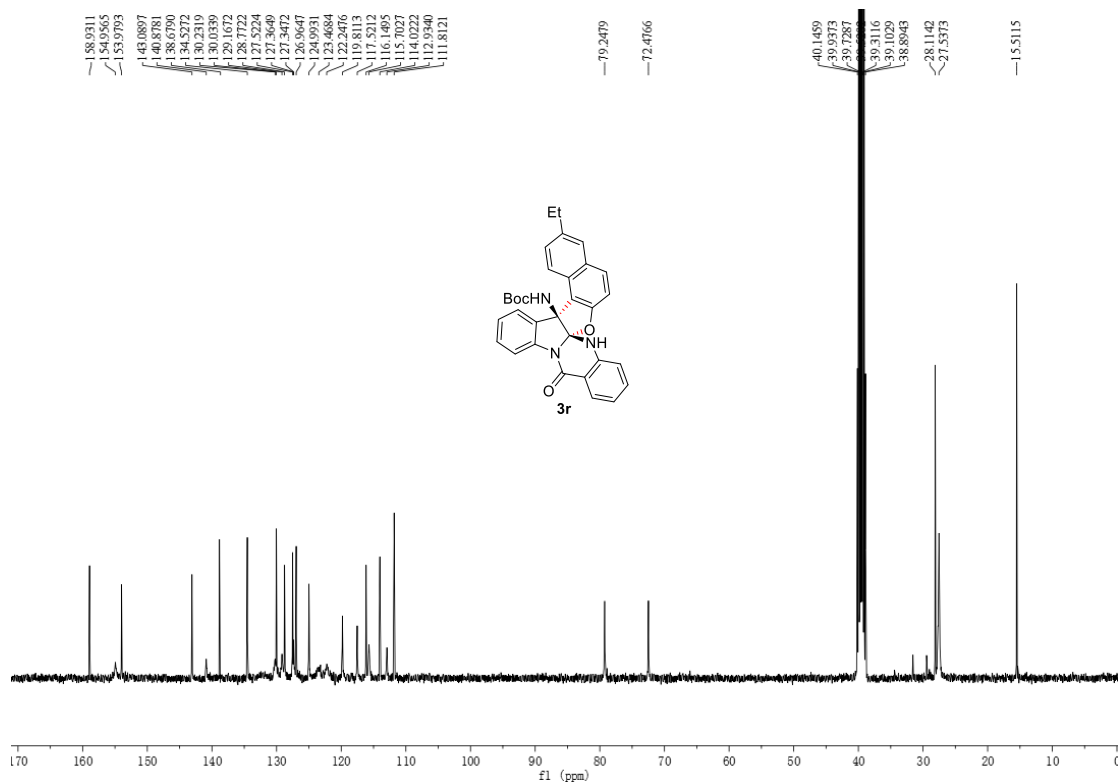

$^1\text{H}$  NMR and  $^{13}\text{C}$  NMR of **3s**

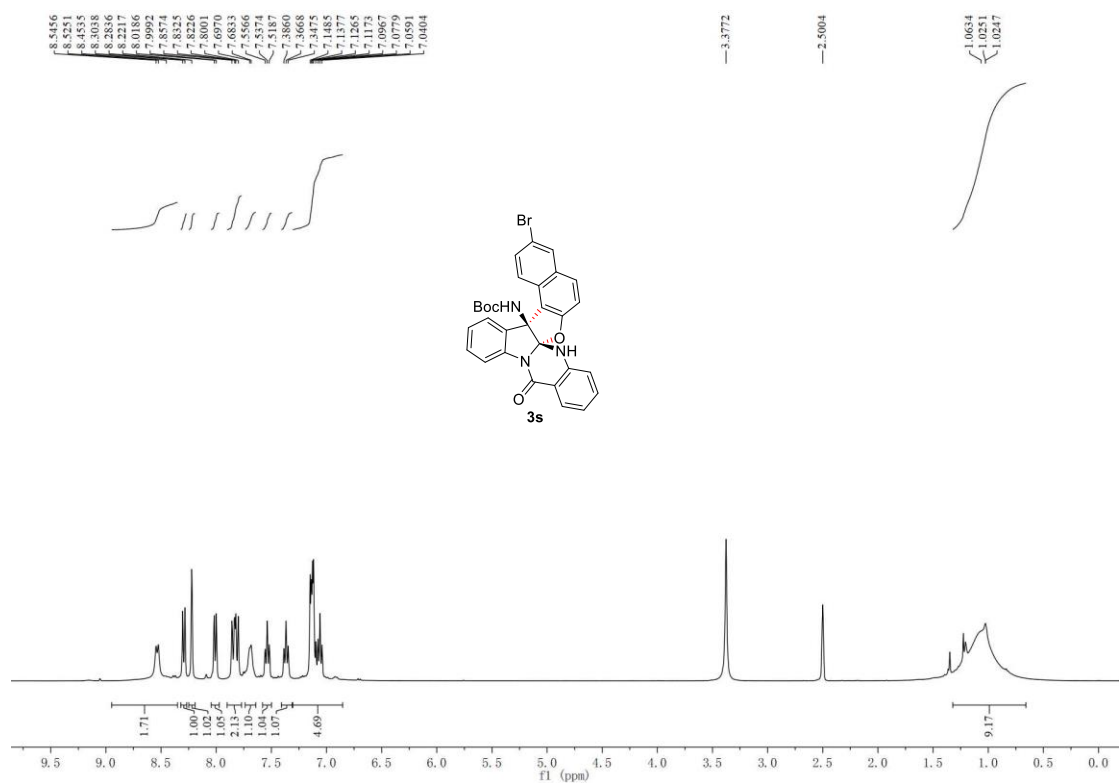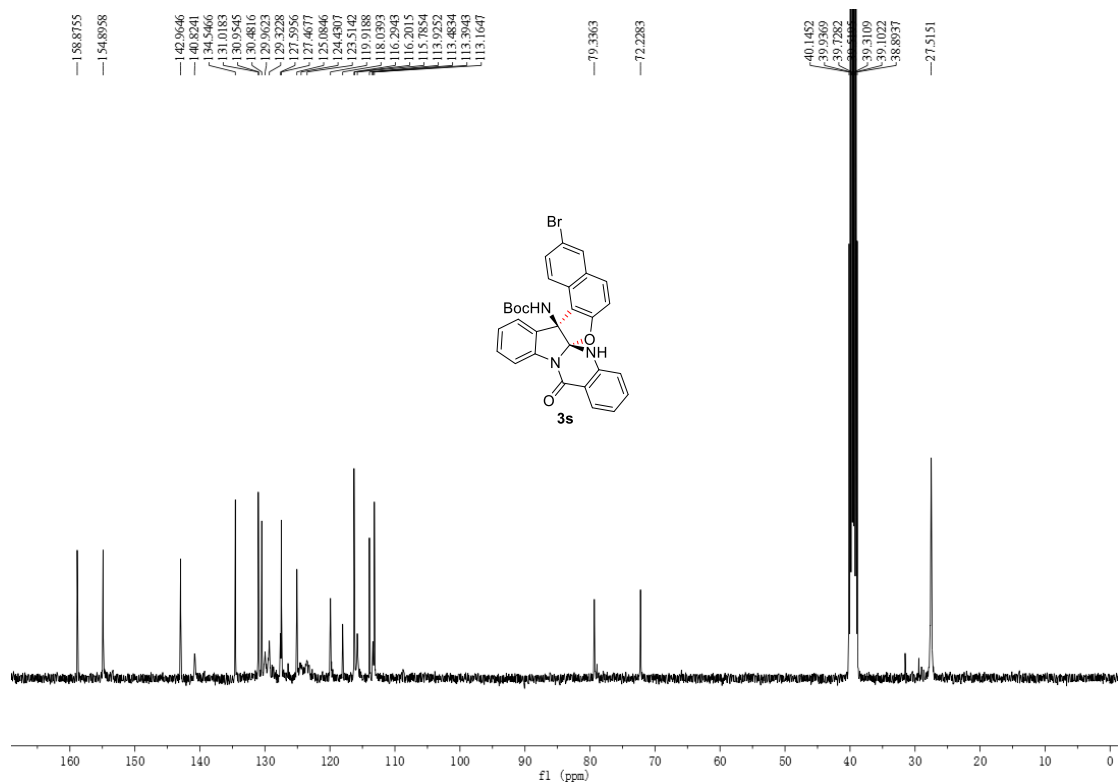

$^1\text{H}$  NMR and  $^{13}\text{C}$  NMR of **3t**

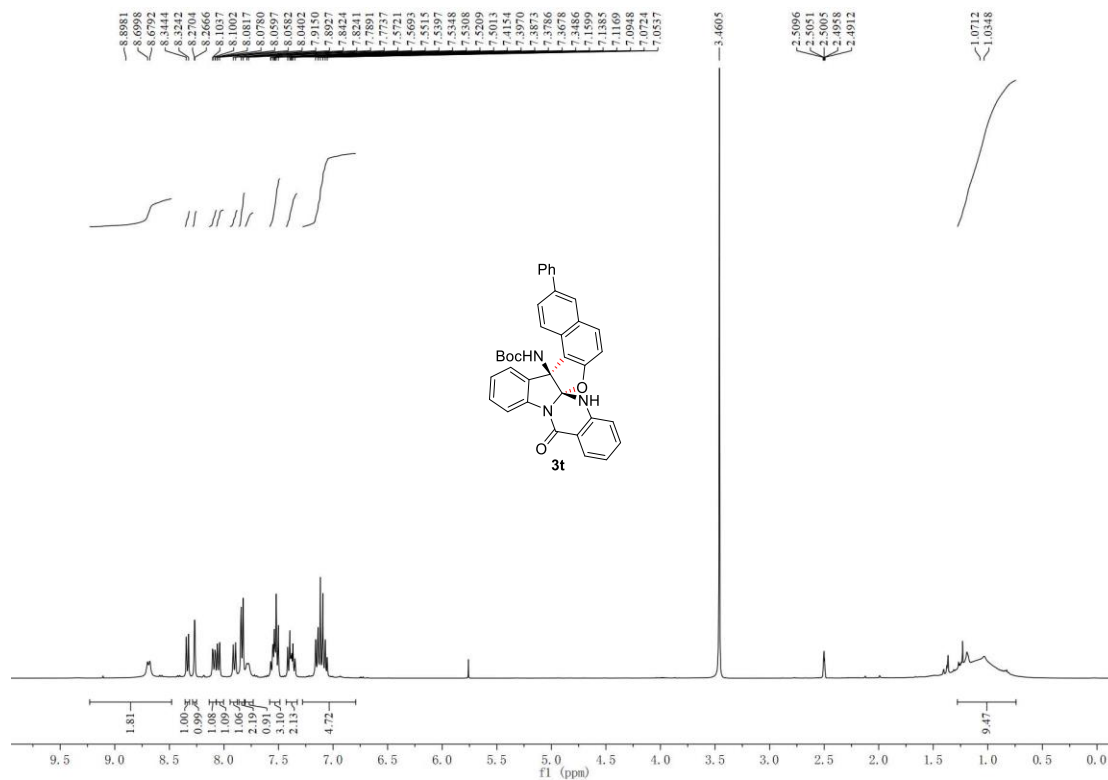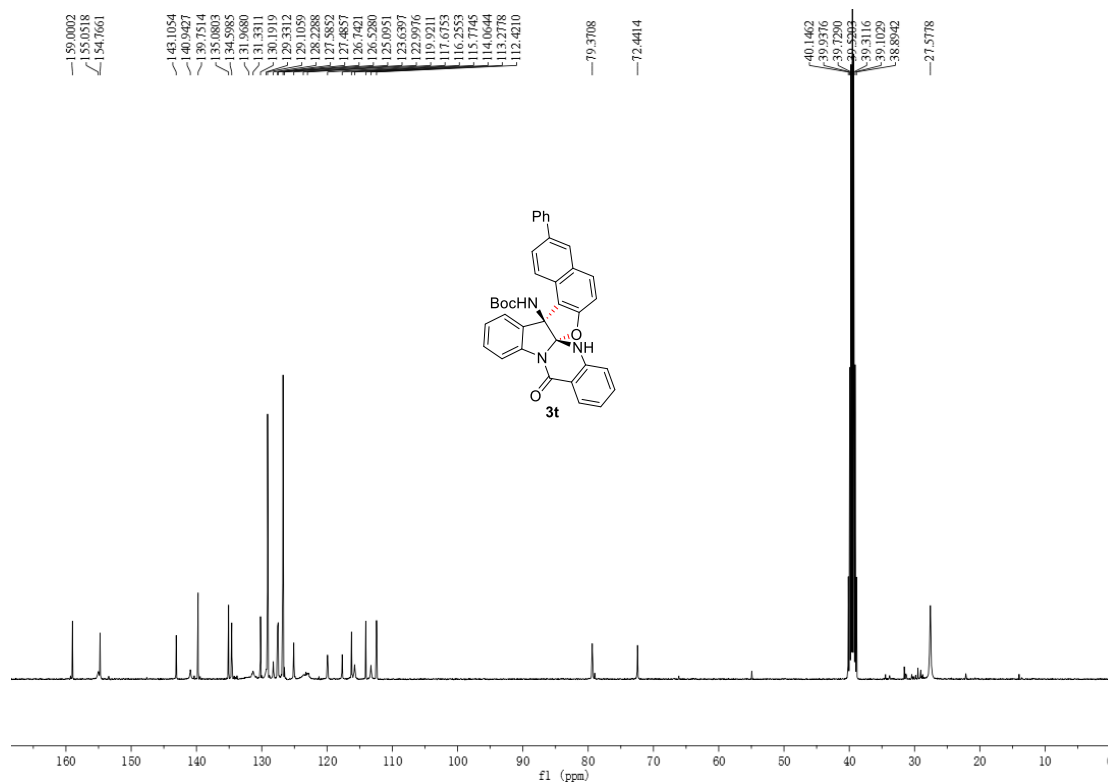

$^1\text{H}$  NMR and  $^{13}\text{C}$  NMR of **3u**

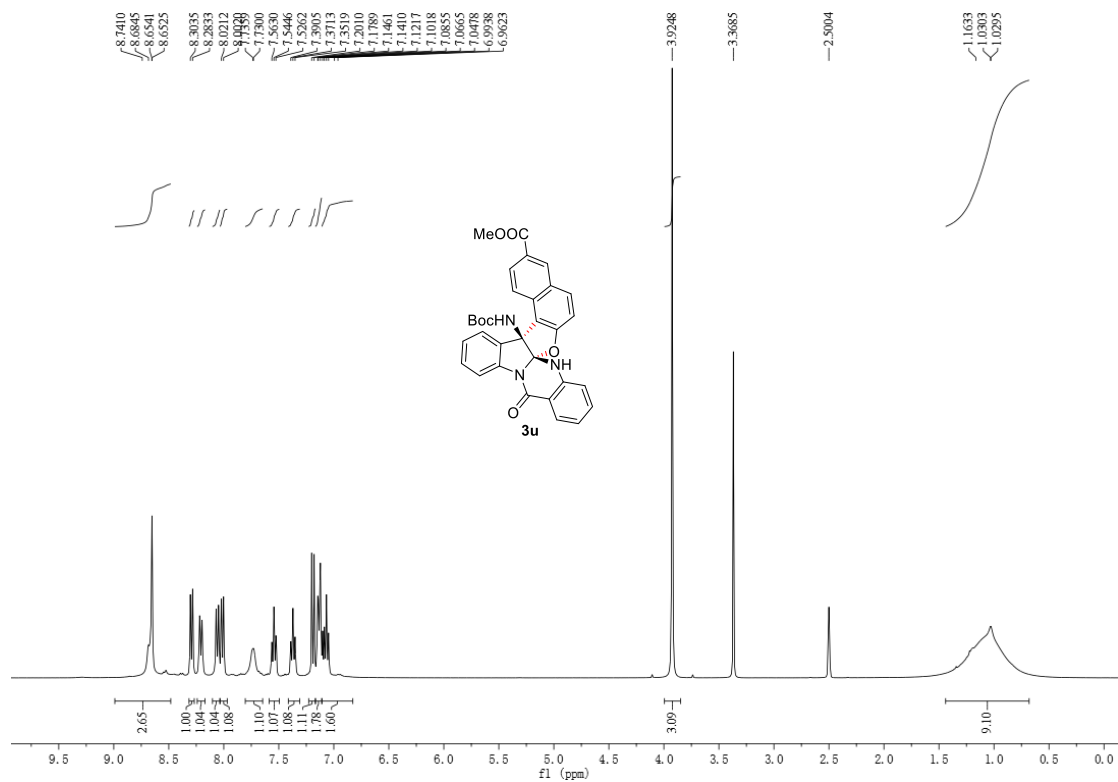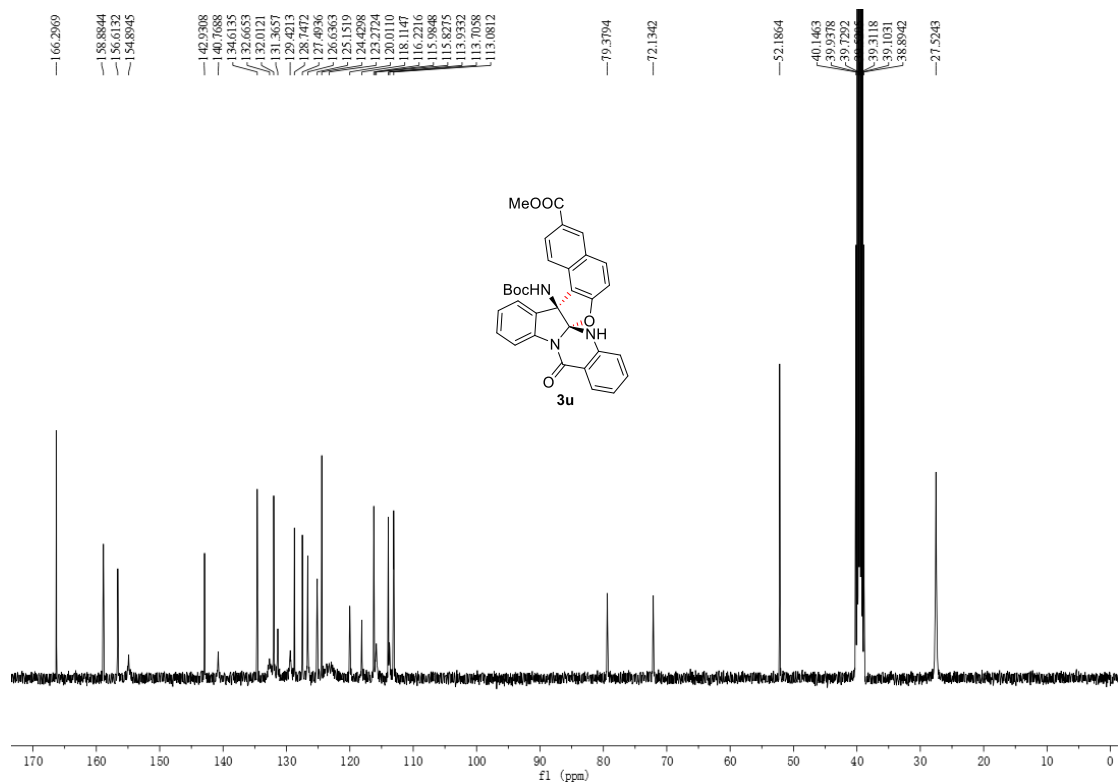

$^1\text{H}$  NMR and  $^{13}\text{C}$  NMR of **3w**

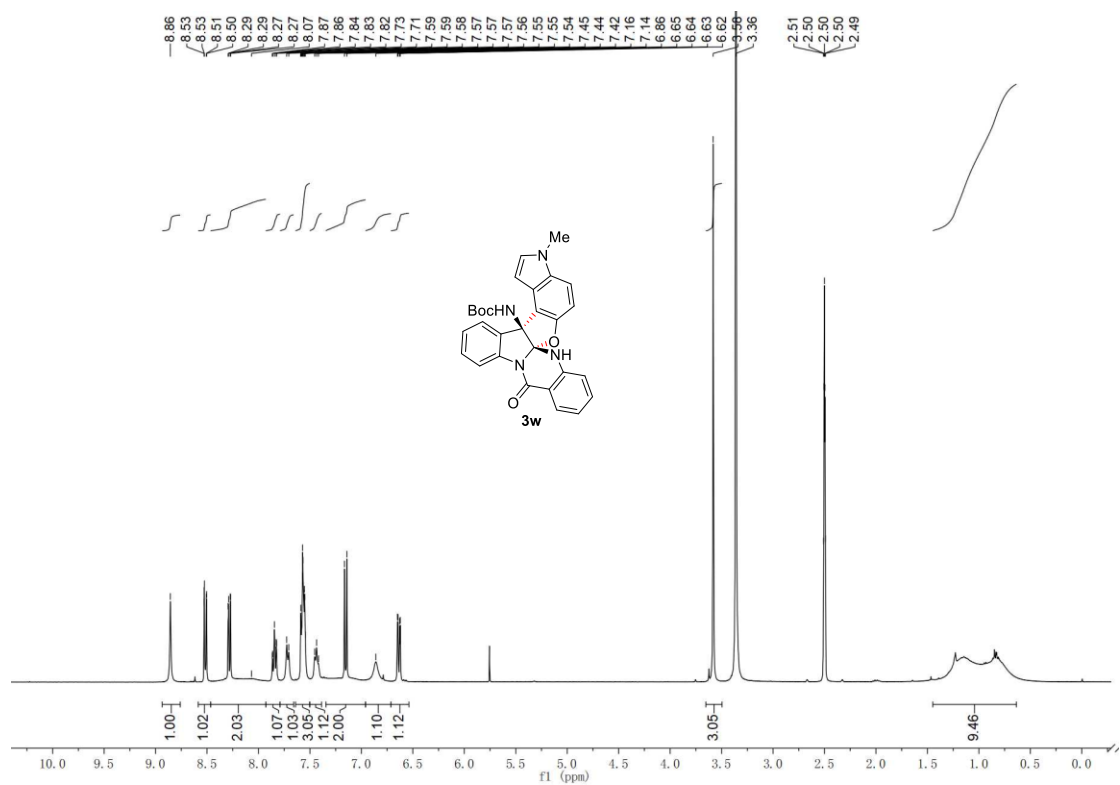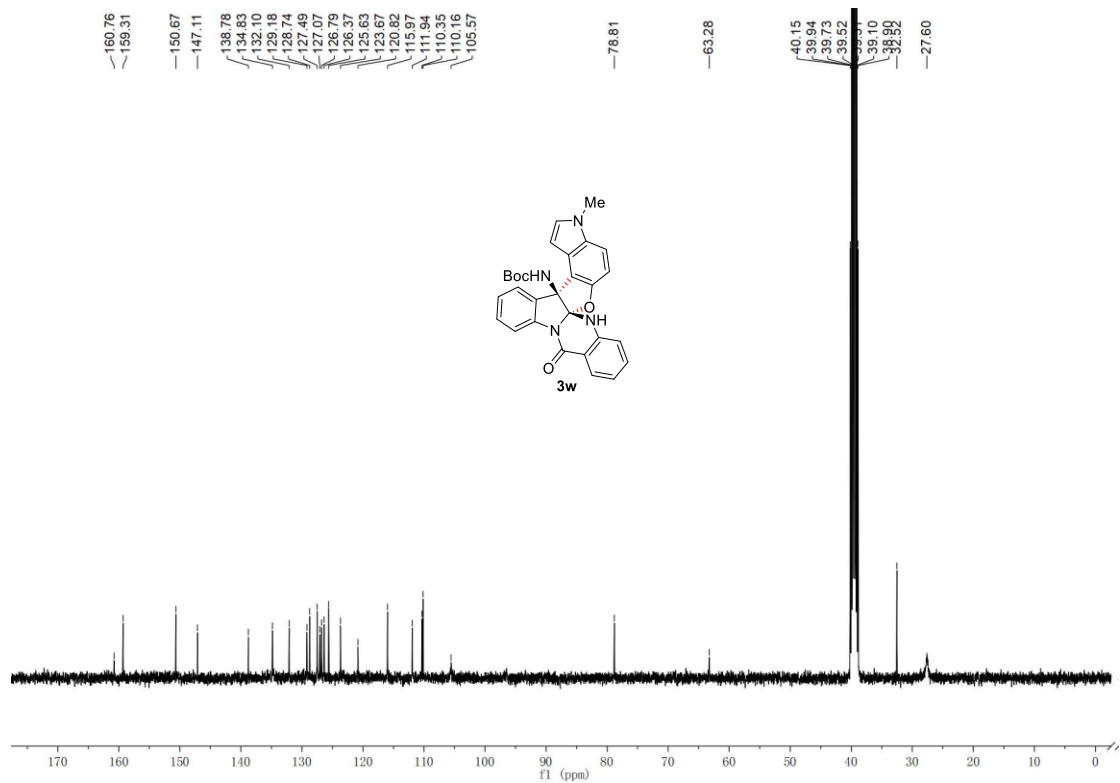

$^1\text{H}$  NMR and  $^{13}\text{C}$  NMR of **5a**

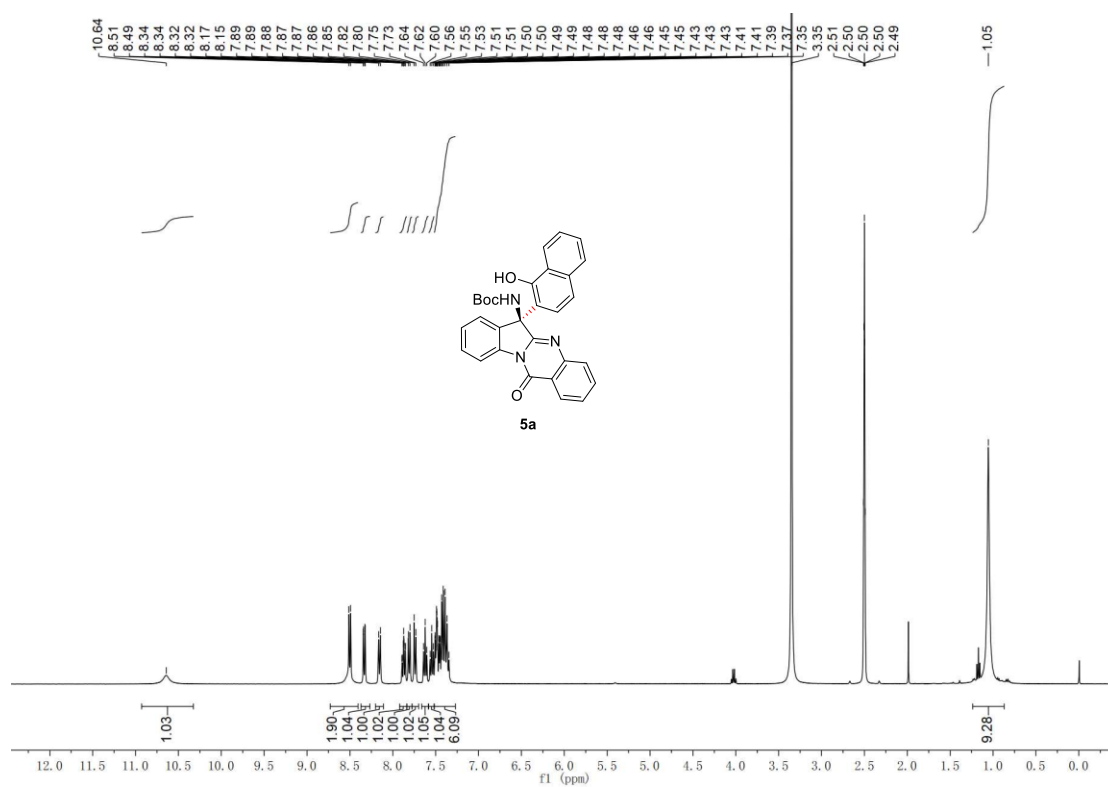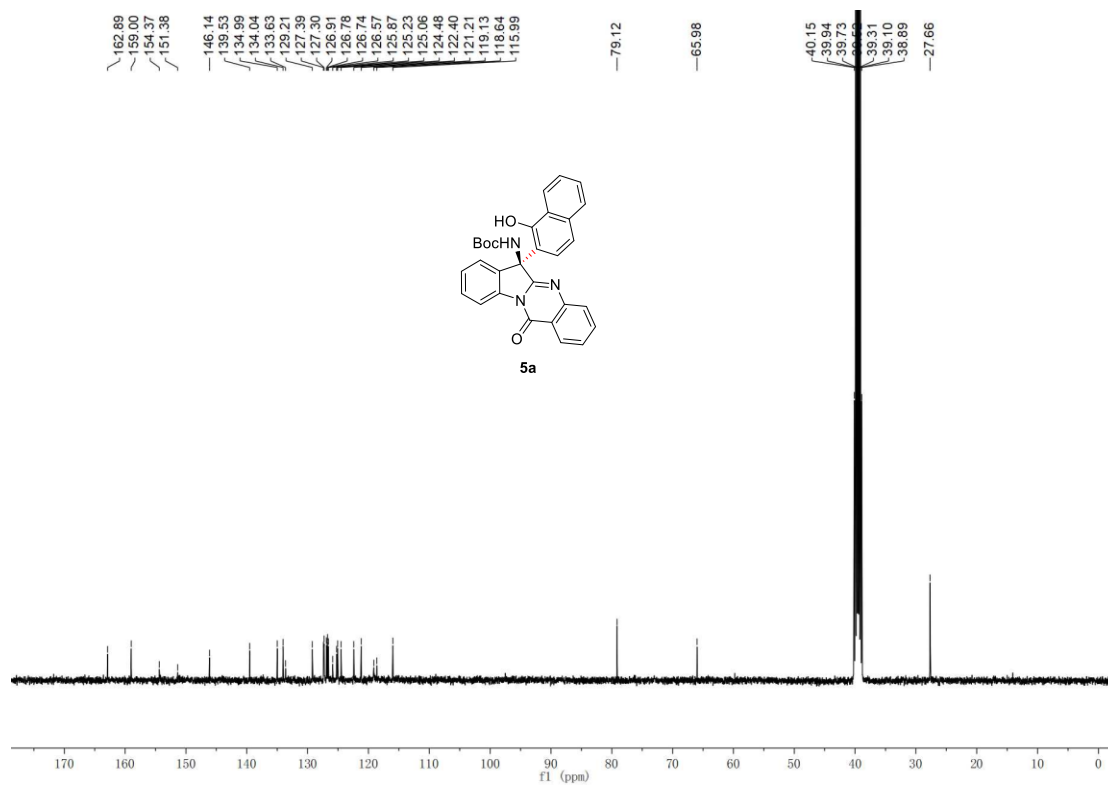

$^1\text{H}$  NMR and  $^{13}\text{C}$  NMR of **5b**

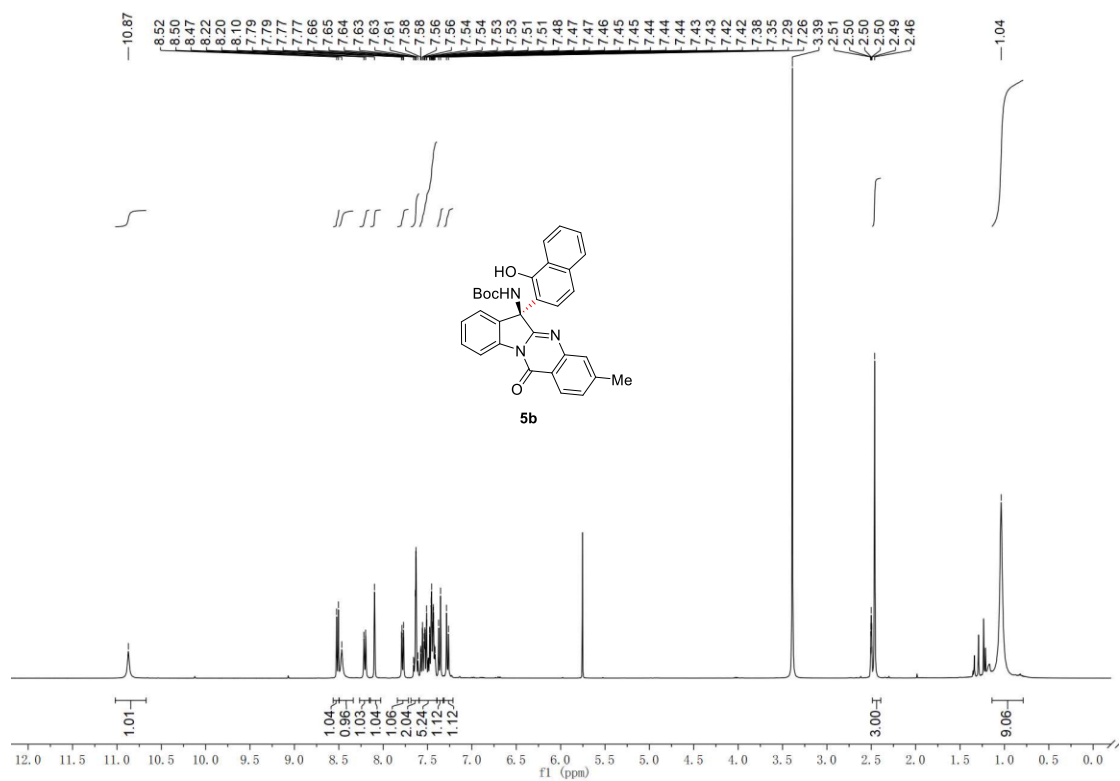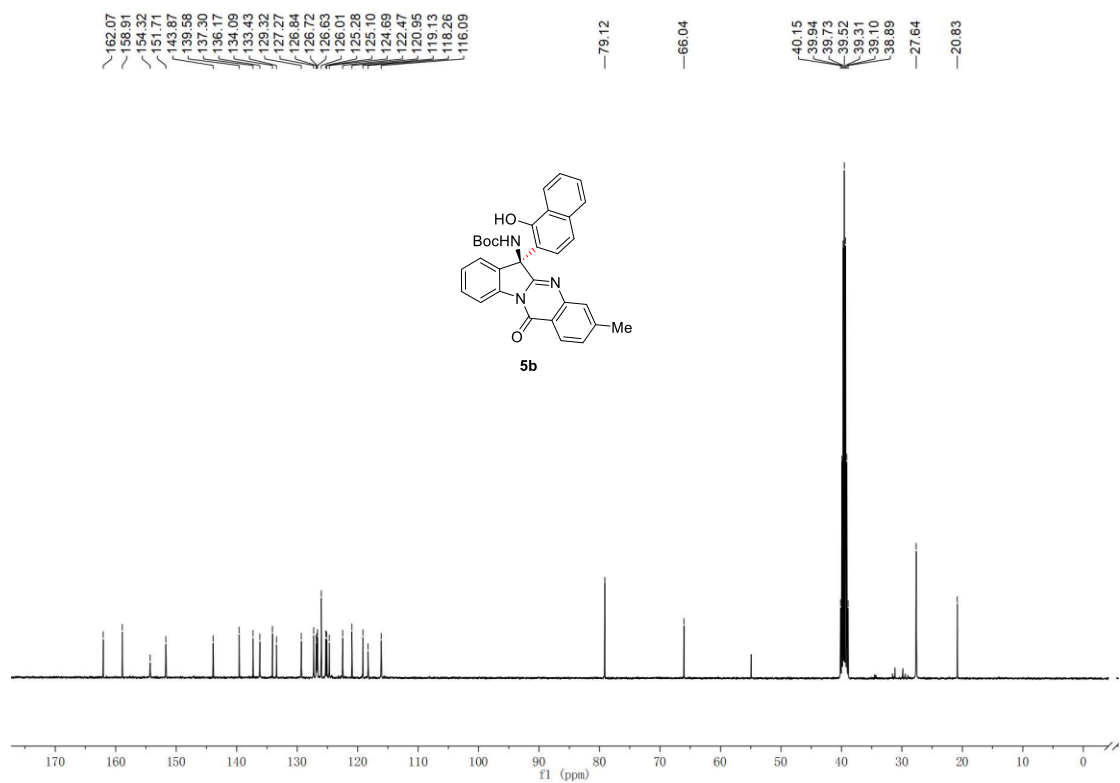

$^1\text{H}$  NMR and  $^{13}\text{C}$  NMR of **5c**

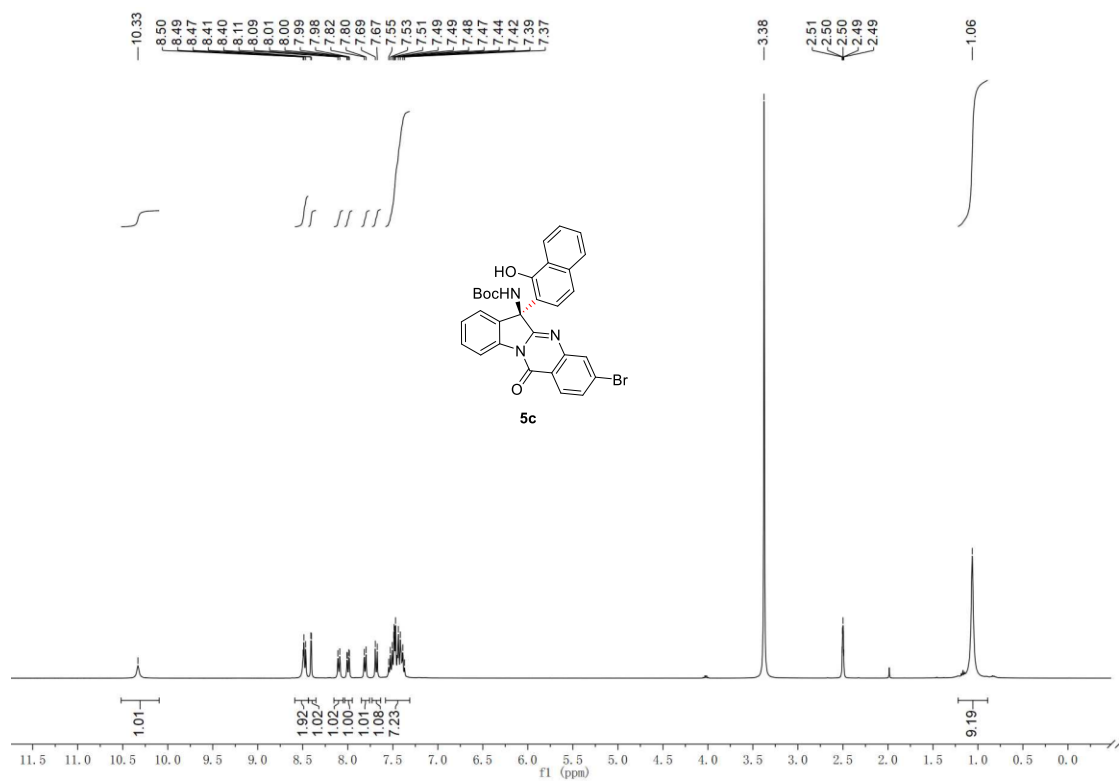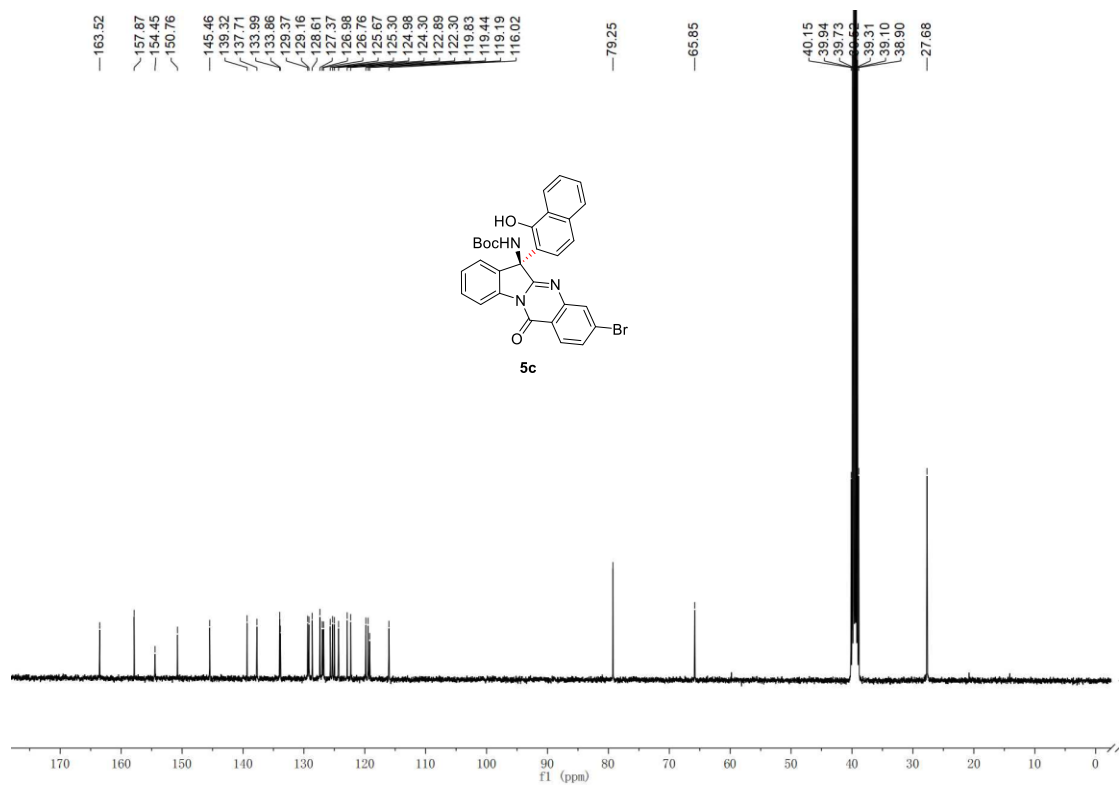

$^1\text{H}$  NMR and  $^{13}\text{C}$  NMR of **5d**

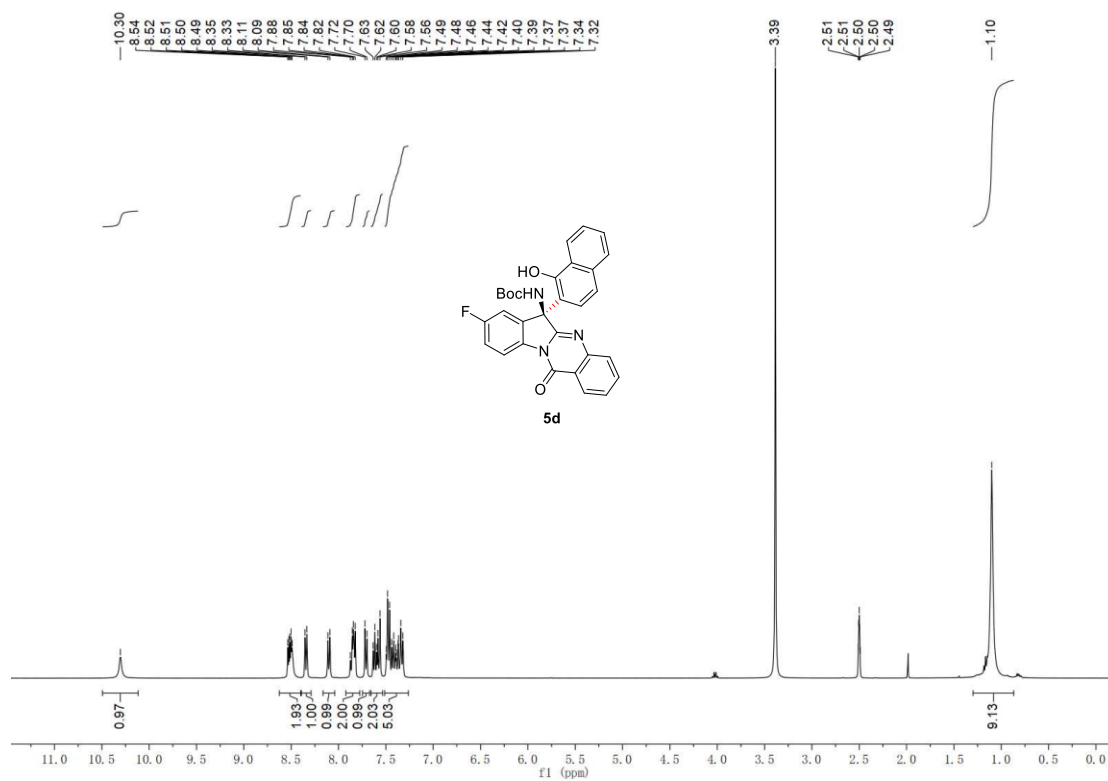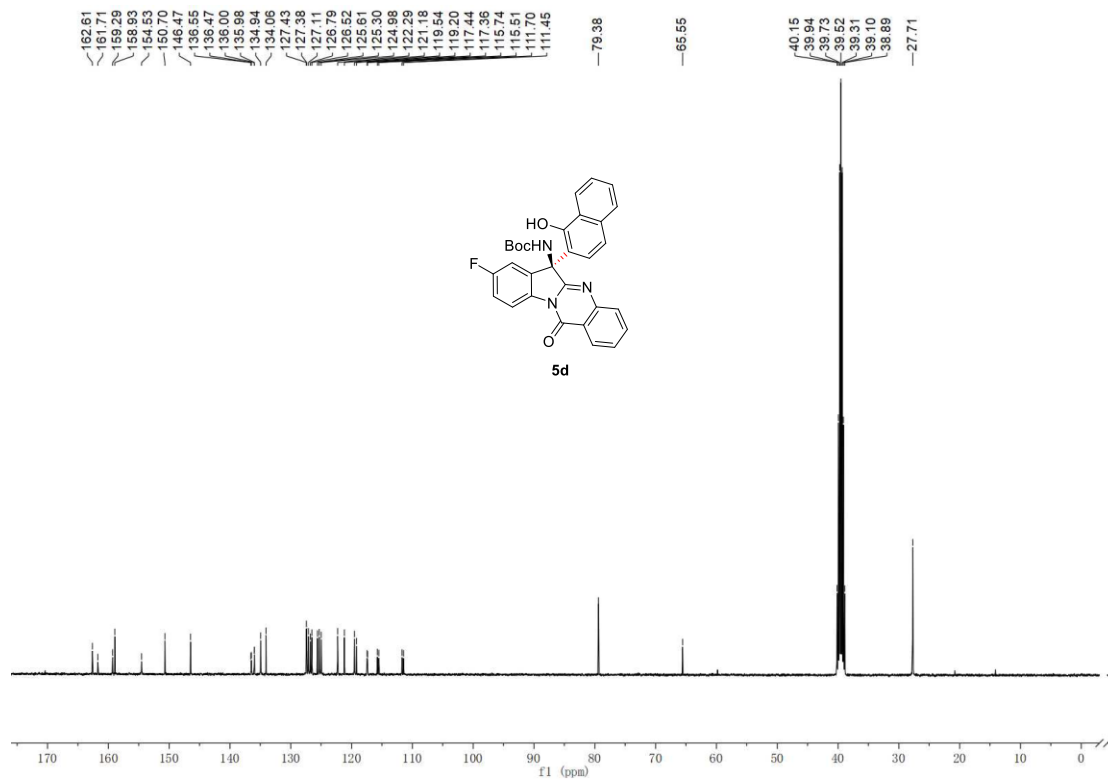

$^1\text{H}$  NMR and  $^{13}\text{C}$  NMR of **5e**

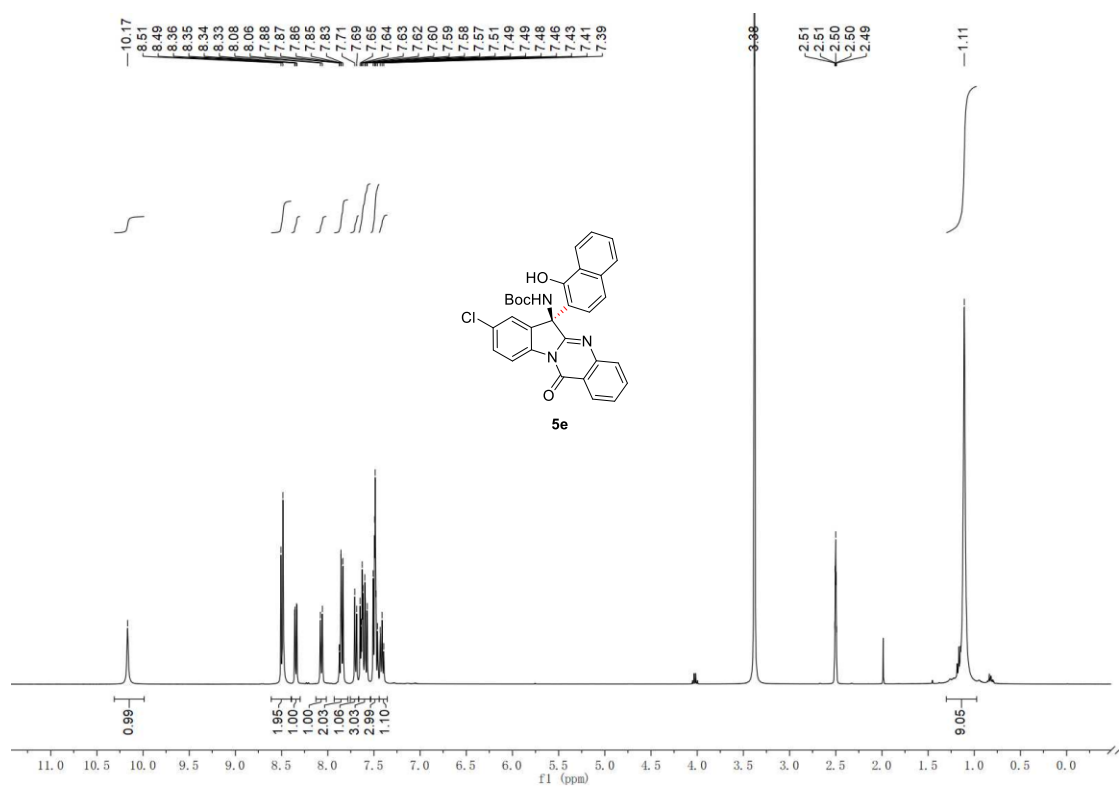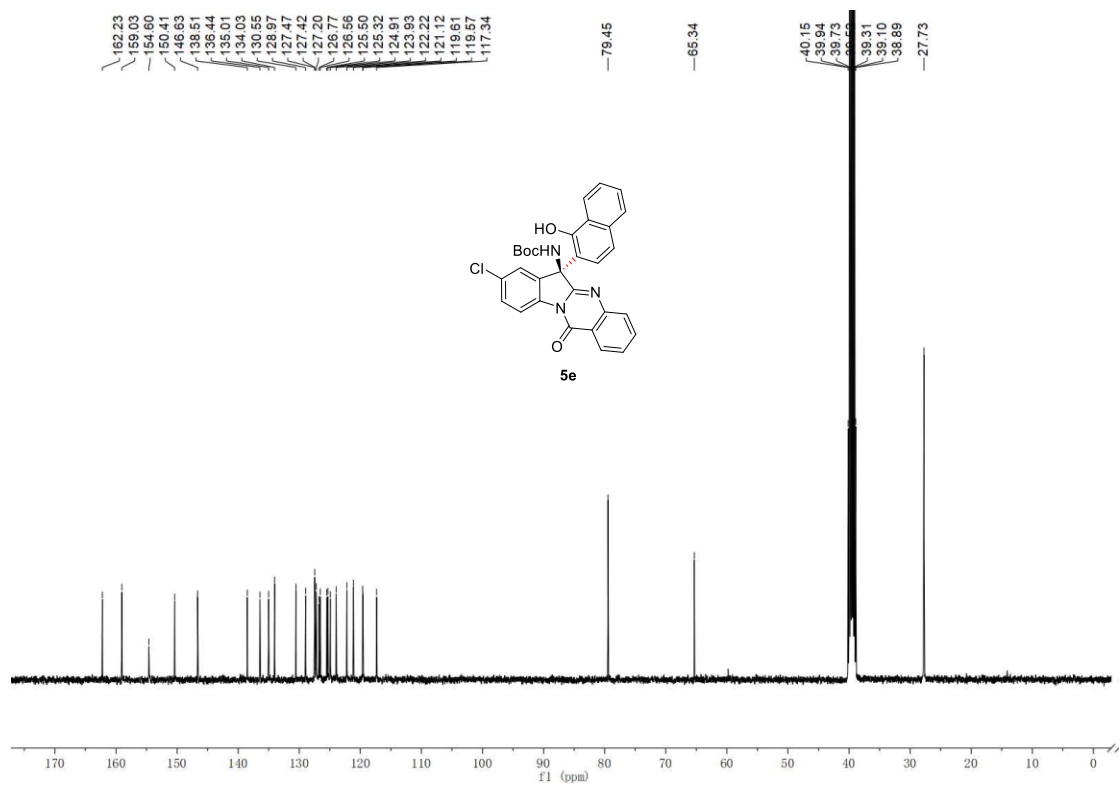

$^1\text{H}$  NMR and  $^{13}\text{C}$  NMR of **5f**

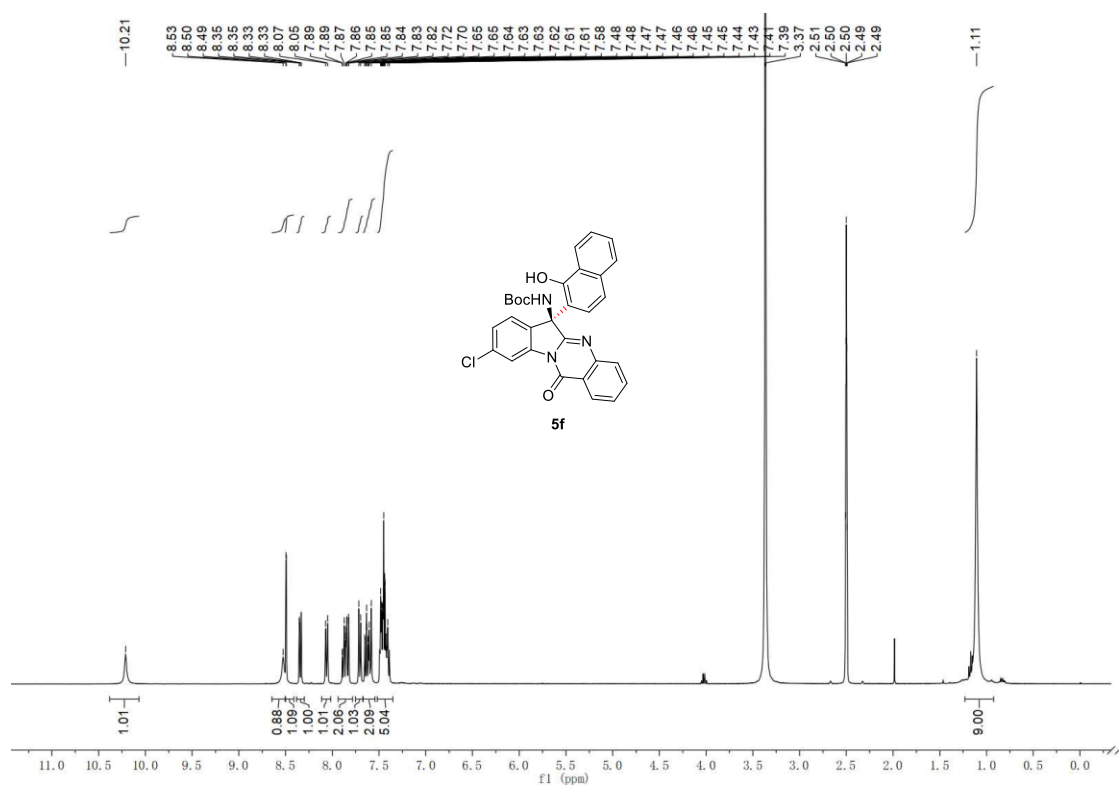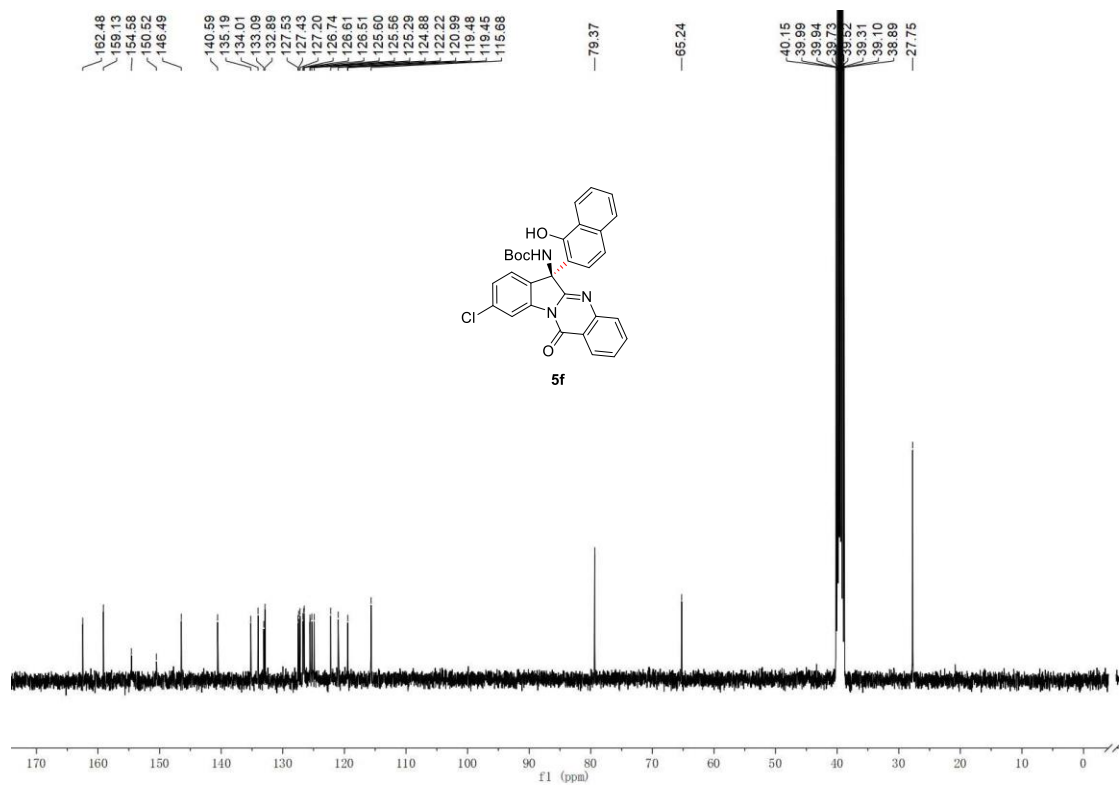

$^1\text{H}$  NMR and  $^{13}\text{C}$  NMR of **5g**

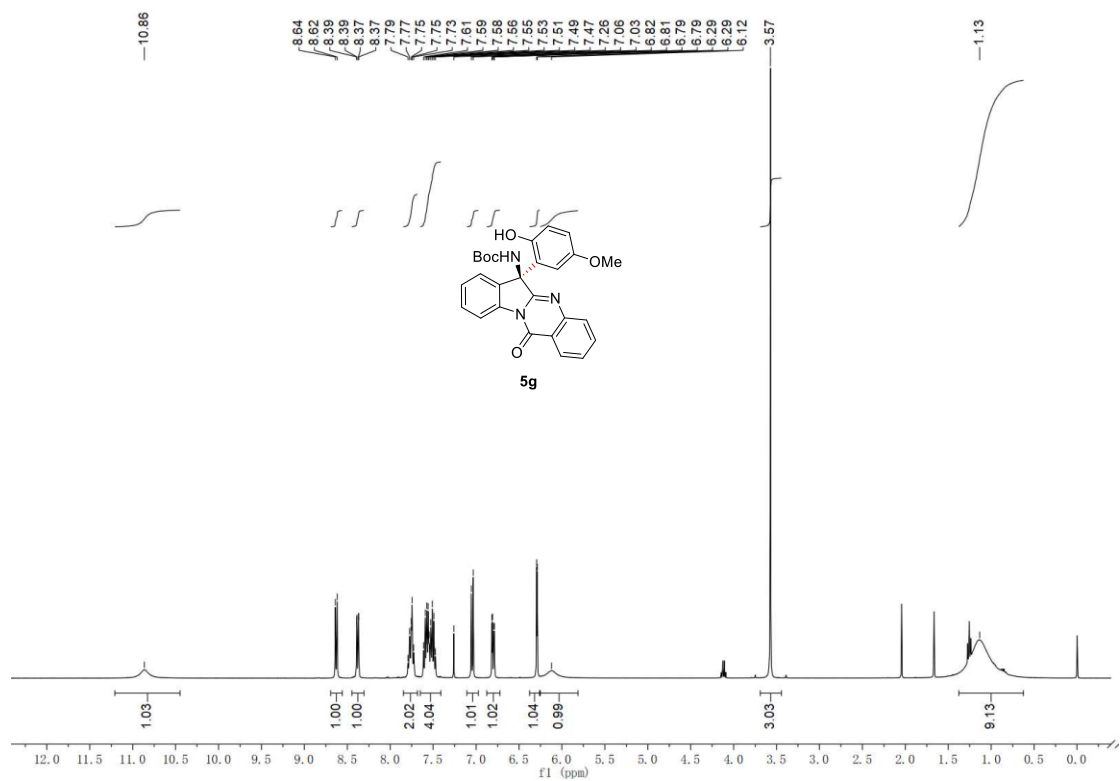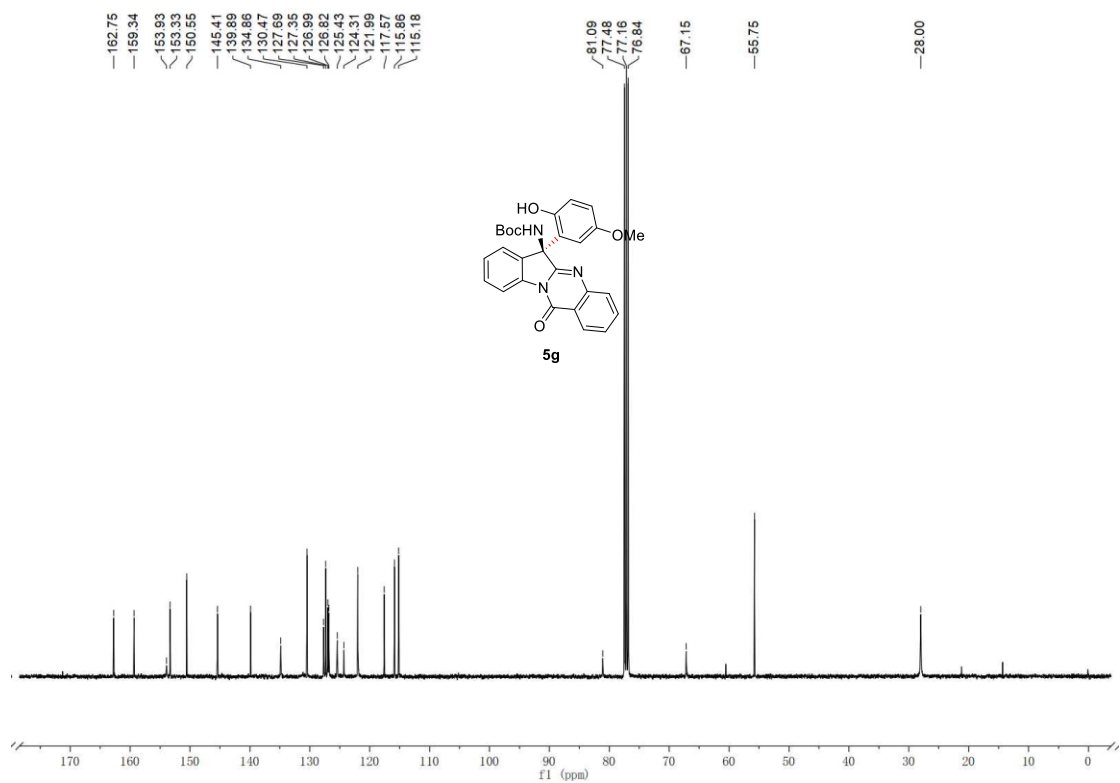

$^1\text{H}$  NMR and  $^{13}\text{C}$  NMR of **5h**

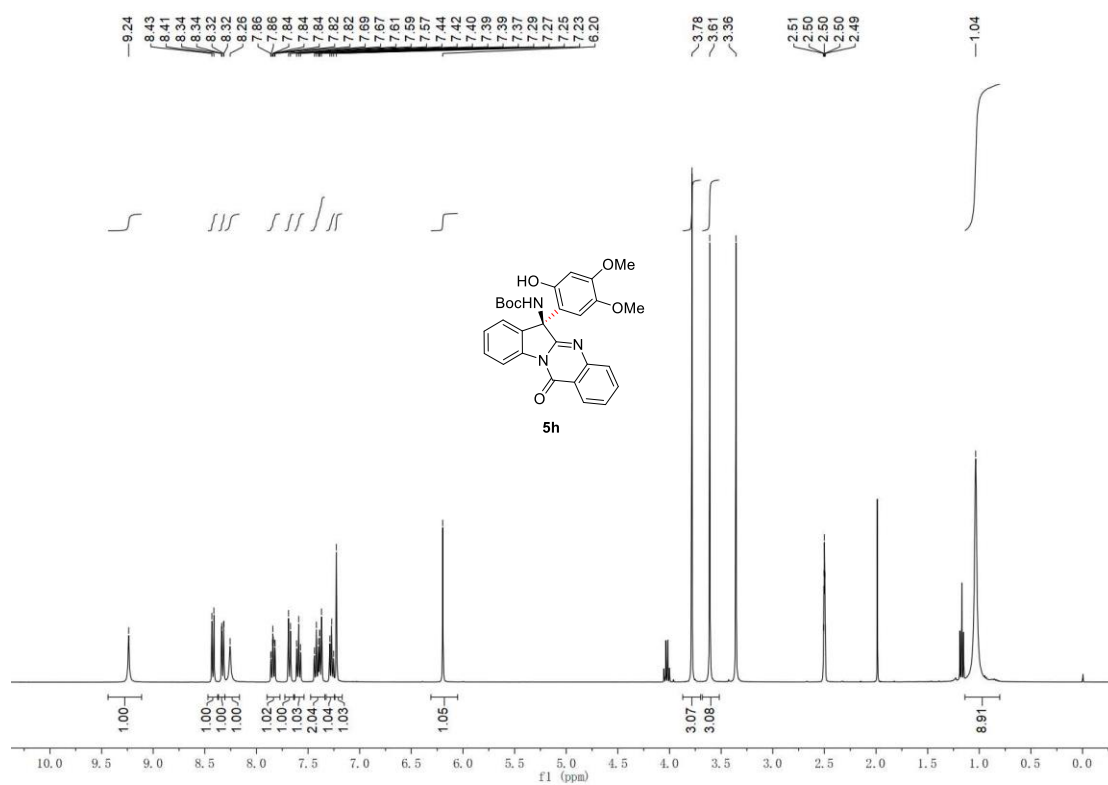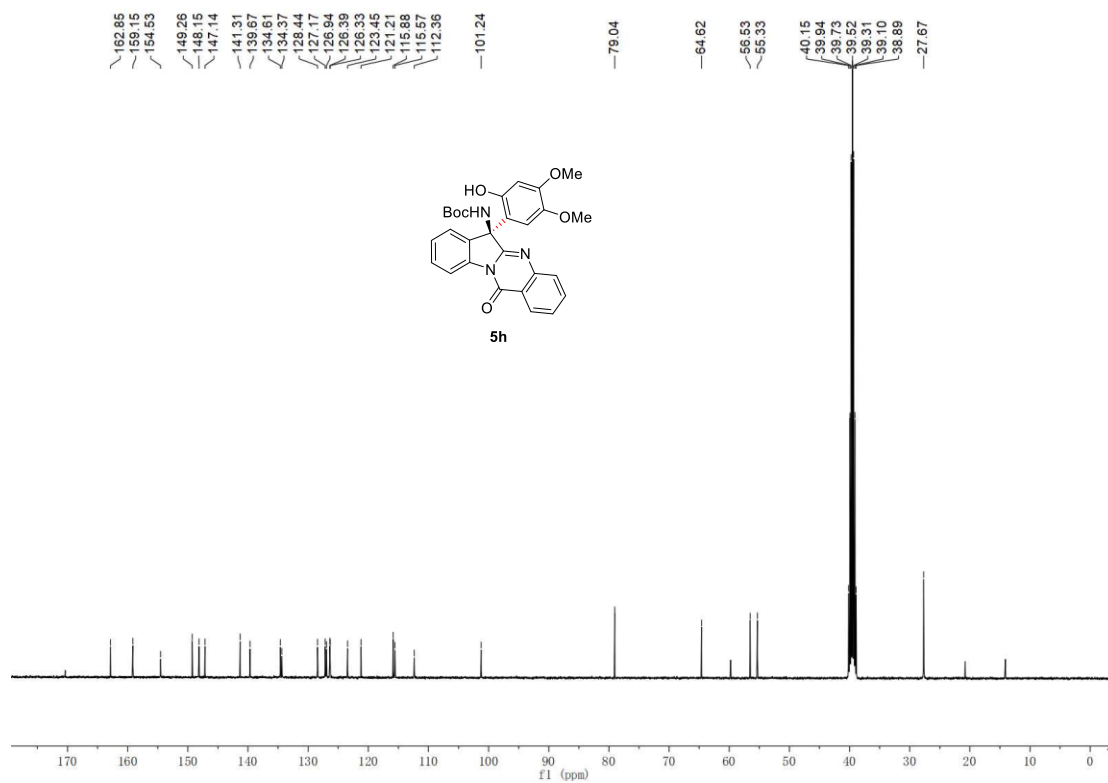

Supplement: d3qo02125d1.pdf [file d3qo02125d1.pdf]
